# Supplementary material for: Dynamic early clusters of nodal proteins contribute to node of Ranvier assembly during myelination of peripheral neurons
Source: eLife. 2021 Jul 9;10:e68089. doi: 10.7554/eLife.68089 (PMC8289411; doi:10.7554/eLife.68089)
Supplement: Figure 2—source data 1. [file elife-68089-fig2-data1.xlsx]

## Sheet: Sheet1
	Figure 2A-source data
	Clusters / 100 neurons
	Matrigel		Collagen
	Schwann cells / Myelinating medium		Schwann cells / Myelinating medium
	Yes / Yes	No / Yes	Yes / Yes	Yes / No
	54.3013	3.27273	13.8737	1.27273
	45.3506	0.909091	13.8737	1.45454
	36.549	0.181818	12.3819	1.63636
