# Supplementary material for: Dynamic early clusters of nodal proteins contribute to node of Ranvier assembly during myelination of peripheral neurons
Source: eLife. 2021 Jul 9;10:e68089. doi: 10.7554/eLife.68089 (PMC8289411; doi:10.7554/eLife.68089)
Supplement: Figure 3—figure supplement 1—source data 1. [file elife-68089-fig3-figsupp1-data1.xlsx]

## Sheet: Sheet1
	Figure 3S1B-source data																								Figure 3S1C-source data
	Normalised intensity																								Recovery (%)
Time (s)	Unmyelinated axons						Early clusters							Heminodes					Nodes						Unmyelinated axons	Early clusters	Heminodes	Nodes
0	0	0	0	0	0	0	0	0	0	0	0	0	0	0	0	0	0	0	0	0	0	0	0		1.01281	0.585425	0.492376	0.027824
3.991	0.274303	0.178425	0.11963	0.142516	0.190463	0.234789	0.120342	0.129057	0.1938	0.0916713	0.145875	0.099615	0.208568	-0.00140931	0.00151309	0.00367385	0.000347023	-0.00804431	-0.000705534	0.00571467	-0.0211412	-0.00406935	-0.00235393		0.906974	0.552149	0.402783	0.026485
7.982	0.367125	0.236875	0.127383	0.301036	0.275226	0.344444	0.16032	0.168812	0.255931	0.107242	0.183355	0.138405	0.279172	0.0344528	0.0139201	0.041585	0.0387864	-0.0136549	0.00263956	0.0176632	-0.0257077	0.00337895	-0.00806411		0.941909	0.569664	0.531951	-0.0314
11.973	0.441492	0.33331	0.207034	0.396068	0.365968	0.361071	0.200449	0.184767	0.292456	0.122392	0.215262	0.143794	0.291789	0.0466212	0.0253598	0.0680088	0.0541166	3.28761e-05	0.00405693	0.00533236	-0.0144875	0.00301832	-0.0145645		0.903812	0.596147	0.415409	0.010283
15.964	0.486704	0.350346	0.280994	0.368237	0.395137	0.457314	0.221789	0.207207	0.262378	0.133338	0.220864	0.176146	0.330036	0.068046	0.0338876	0.0814049	0.0515478	0.0193872	0.0084962	0.0157416	-0.0153864	-0.00165269	-0.0126213		0.825217	0.542252	0.355811	0.002771
19.955	0.506869	0.397903	0.332025	0.484631	0.430461	0.465551	0.224224	0.218076	0.282544	0.173154	0.247205	0.203194	0.322878	0.0649431	0.0417088	0.103815	0.0358612	0.0250483	0.00519248	0.0195473	-0.0317621	0.000938959	-0.010457		0.809395	0.568319
23.946	0.527671	0.351293	0.449978	0.426984	0.493369	0.473248	0.234202	0.222703	0.313338	0.166695	0.25612	0.219387	0.332266	0.0807277	0.0488285	0.111002	0.0521791	0.0503692	0.00646918	0.00840009	-0.0262958	0.0141514	-0.0154588			0.458247
27.937	0.554341	0.43176	0.450607	0.490477	0.527196	0.502017	0.233863	0.249832	0.312326	0.165379	0.267636	0.216223	0.346425	0.0911662	0.0597828	0.11997	0.0618157	0.073615	0.00793672	0.0200945	-0.0236062	0.00591505	-0.0124711
31.928	0.612377	0.422273	0.496755	0.519419	0.479826	0.476227	0.257742	0.224942	0.316243	0.193077	0.279665	0.243935	0.34131	0.106597	0.066885	0.13389	0.0663228	0.067029	0.0112825	0.0179111	-0.0310692	0.0100379	-0.0174109
35.919	0.615369	0.491376	0.454228	0.553946	0.563009	0.568416	0.256252	0.236292	0.323204	0.175881	0.27706	0.259761	0.350213	0.114121	0.074873	0.153553	0.0853811	0.0705635	0.00602852	0.00631611	-0.0265261	0.0114584	-0.0107715
39.91	0.664395	0.450325	0.415822	0.53917	0.557602	0.570888	0.281709	0.252966	0.327848	0.187649	0.266922	0.268156	0.379338	0.107191	0.0718407	0.165067	0.0892417	0.0768185	0.014416	0.00877096	-0.0328459	0.0128356	-0.0208481
43.901	0.650521	0.465912	0.538384	0.590129	0.589315	0.569261	0.261465	0.258131	0.346102	0.204873	0.270271	0.271711	0.41681	0.114971	0.0964957	0.150185	0.0975702	0.0630302	0.00865416	0.0169606	-0.0181573	0.00860609	-0.017431
47.892	0.660876	0.529783	0.465301	0.626018	0.579647	0.59806	0.279978	0.263766	0.333523	0.181196	0.286972	0.266672	0.449281	0.121576	0.0929712	0.171299	0.0878018	0.0933944	0.0121525	0.0155434	-0.016503	0.00764946	-0.0171491
51.883	0.677359	0.517763	0.528642	0.662144	0.642881	0.630692	0.279463	0.260917	0.338359	0.189489	0.29607	0.287026	0.456405	0.13273	0.101208	0.15732	0.113596	0.0757307	0.0113423	0.0141764	-0.0139009	-0.00128911	-0.0120369
55.874	0.68653	0.545747	0.564763	0.623999	0.597126	0.652599	0.292376	0.262818	0.336498	0.202595	0.304687	0.286405	0.391116	0.136772	0.103507	0.189339	0.122839	0.129702	0.00904343	0.0129431	-0.0261407	0.0134123	-0.0154935
59.865	0.687409	0.512358	0.59159	0.682966	0.638827	0.625982	0.293601	0.280039	0.366731	0.21849	0.293006	0.288125	0.328215	0.142239	0.106344	0.180959	0.121382	0.113704	0.0140439	0.0219324	-0.0279053	0.0182877	-0.022267
63.856	0.668315	0.544629	0.602102	0.674262	0.591811	0.644455	0.304118	0.279606	0.348614	0.237574	0.32585	0.295811	0.338293	0.159749	0.122217	0.174329	0.115634	0.118668	0.0171213	0.0202029	-0.0256806	0.0105264	-0.0124156
67.847	0.683078	0.489105	0.628783	0.638007	0.606353	0.601418	0.305641	0.282973	0.37917	0.239266	0.297213	0.30551	0.341497	0.160724	0.129047	0.17798	0.115325	0.127396	0.0135864	0.0158439	-0.0252461	0.0203087	-0.0116881
71.838	0.715187	0.561173	0.615011	0.660566	0.662237	0.662651	0.317429	0.275411	0.385106	0.225442	0.316232	0.294398	0.334918	0.166343	0.136764	0.200376	0.114306	0.12996	0.0196338	0.021082	-0.0251802	0.00478593	-0.0203661
75.829	0.738265	0.583485	0.615219	0.706734	0.667762	0.642879	0.340365	0.283551	0.361148	0.239964	0.304114	0.306051	0.328566	0.179123	0.127904	0.198629	0.135911	0.150867	0.0190546	0.0177898	-0.0250877	0.0223021	-0.0152867
79.82	0.751684	0.621999	0.611859	0.685181	0.661616	0.728692	0.311113	0.28289	0.364179	0.237335	0.309234	0.303946	0.352583	0.186573	0.147972	0.198595	0.12738	0.158635	0.0195974	0.0179469	-0.0210474	0.0136443	-0.0105501
83.811	0.740634	0.631313	0.648856	0.704754	0.679198	0.701907	0.331274	0.287453	0.378583	0.236869	0.315399	0.332487	0.364466	0.197116	0.146937	0.206067	0.142111	0.140387	0.0171955	0.0127896	-0.0156236	0.00778733	-0.0189576
87.802	0.747993	0.606278	0.700324	0.705343	0.738151	0.694545	0.340461	0.330134	0.396547	0.248844	0.345585	0.302497	0.339118	0.207757	0.152272	0.232053	0.121283	0.140537	0.0236574	0.0292801	-0.0341069	0.0156657	-0.0177348
91.793	0.773353	0.606916	0.630999	0.716855	0.69073	0.710546	0.332643	0.293802	0.366743	0.243378	0.316478	0.33879	0.356976	0.201871	0.145048	0.220851	0.148732	0.142101	0.0198859	0.0224717	-0.0319615	0.00711568	-0.0197942
95.784	0.760533	0.624998	0.628583	0.722781	0.709233	0.753612	0.370139	0.314678	0.38134	0.22555	0.327666	0.329363	0.334858	0.202624	0.162151	0.231035	0.136317	0.135675	0.0173938	0.0149377	-0.034809	0.0093192	-0.00634487
99.775	0.781259	0.626864	0.683323	0.75893	0.749215	0.726832	0.375189	0.330226	0.373681	0.272951	0.300482	0.33219	0.36434	0.216331	0.155378	0.269085	0.141488	0.144014	0.0220941	0.0120684	-0.0202452	0.00659426	-0.00807797
103.766	0.774861	0.598419	0.698664	0.760104	0.812066	0.79998	0.405753	0.318903	0.387101	0.256337	0.312618	0.324159	0.350523	0.226356	0.156496	0.264474	0.155164	0.140592	0.00946645	0.020379	-0.0224894	0.00772082	-0.00951905
107.757	0.77734	0.644184	0.712553	0.714257	0.757063	0.723085	0.379399	0.325723	0.393157	0.25319	0.321532	0.342794	0.374676	0.21613	0.157382	0.275895	0.137948	0.14402	0.0211284	0.0153816	-0.0319658	0.0156804	-0.00807338
111.748	0.759821	0.592609	0.683604	0.769614	0.779359	0.803135	0.394138	0.338784	0.404719	0.268179	0.331856	0.334525	0.369665	0.227805	0.1581	0.261707	0.130944	0.12554	0.0128151	0.021147	-0.0368362	0.0177351	-0.0100799
115.739	0.743398	0.623587	0.711334	0.779447	0.755537	0.816135	0.398029	0.351275	0.382667	0.294947	0.3302	0.325398	0.372426	0.234418	0.170822	0.265987	0.170948	0.144973	0.0168639	0.0104614	-0.0279452	0.0108464	-0.00952295
119.73	0.79241	0.64127	0.660105	0.776679	0.77407	0.831375	0.397147	0.3415	0.428202	0.26588	0.327728	0.343962	0.366528	0.25095	0.155619	0.285815	0.160801	0.150564	0.0177687	0.0204973	-0.0205607	0.00711289	-0.0154039
123.721	0.779557	0.705318	0.733992	0.76028	0.717735	0.791123	0.392791	0.341253	0.415941	0.270906	0.345904	0.343485	0.37363	0.235768	0.166538	0.282333	0.161146	0.147006	0.0146349	0.00331259	-0.00928995	0.0132469	-0.0133247
127.712	0.764889	0.671467	0.785336	0.729823	0.7513	0.798691	0.405081	0.34432	0.395533	0.278458	0.347127	0.332851	0.399083	0.240968	0.155466	0.303385	0.15689	0.15362	0.0183351	0.0171757	-0.00944854	0.0107061	-0.0122652
131.702	0.810311	0.69247	0.76542	0.799772	0.790454	0.794231	0.387058	0.334109	0.410875	0.278128	0.330439	0.362577	0.388688	0.23375	0.143723	0.302916	0.166922	0.160597	0.012747	0.012702	-0.0138204	0.0105206	-0.00838714
135.693	0.796235	0.667524	0.719094	0.739406	0.737621	0.839224	0.414395	0.342503	0.409553	0.273659	0.351931	0.349246	0.362179	0.250262	0.16462	0.308453	0.171761	0.181851	0.0127641	0.0159431	-0.0115907	0.017459	-0.0218842
139.684	0.822579	0.691752	0.762071	0.801541	0.756178	0.787231	0.436263	0.360291	0.409508	0.278625	0.356598	0.363189	0.380649	0.261437	0.18101	0.316504	0.165998	0.14517	0.0219096	0.0122701	-0.0222015	0.00866485	-0.0232956
143.675	0.797777	0.71535	0.752502	0.78203	0.723099	0.855976	0.42642	0.343417	0.402238	0.267441	0.352228	0.365741	0.389193	0.272909	0.186896	0.326684	0.173121	0.169678	0.0161079	0.0200387	-0.0193269	0.00180488	-0.0204619
147.666	0.816673	0.664671	0.731906	0.812548	0.724354	0.844529	0.427019	0.348919	0.420236	0.285541	0.35182	0.406744	0.415454	0.260669	0.172884	0.335571	0.178817	0.161966	0.0148622	0.0211931	-0.0221086	0.0124256	-0.0204235
151.657	0.804856	0.671117	0.753583	0.79865	0.754468	0.823419	0.421397	0.351124	0.417536	0.289412	0.361774	0.408027	0.413637	0.266778	0.178844	0.330053	0.190077	0.158844	0.0145971	0.0250641	-0.0174727	0.0123443	-0.0154932
155.648	0.825775	0.688885	0.783986	0.784587	0.772427	0.789649	0.43015	0.374273	0.429993	0.295231	0.378817	0.382422	0.390297	0.276064	0.176477	0.324876	0.196054	0.173471	0.0224615	0.0186295	-0.0106612	0.0125258	-0.0265637
159.639	0.827692	0.708526	0.717379	0.751958	0.743091	0.848775	0.43837	0.355906	0.425353	0.292888	0.373904	0.380028	0.399227	0.281928	0.167423	0.323822	0.176494	0.144459	0.0169436	0.02376	-0.0215767	0.0123821	-0.0244535
163.63	0.838018	0.631817	0.804342	0.765056	0.820504	0.827686	0.447223	0.379516	0.435273	0.289438	0.361479	0.369093	0.370138	0.290695	0.187267	0.338214	0.183597	0.161884	0.0210059	0.0168825	-0.0187995	0.0180581	-0.0280637
167.621	0.820154	0.70837	0.810732	0.777192	0.787338	0.819995	0.454626	0.388597	0.41187	0.286438	0.370711	0.372907	0.387325	0.297264	0.193651	0.339719	0.189322	0.188007	0.0156976	0.0211441	-0.00737713	0.00748743	-0.0235119
171.612	0.868623	0.721677	0.832047	0.781825	0.756771	0.8943	0.436598	0.398084	0.432675	0.318808	0.380321	0.390138	0.401614	0.273573	0.189462	0.344085	0.199704	0.185125	0.0132652	0.0184458	-0.0199909	0.00737591	-0.0218486
175.603	0.829509	0.760803	0.779983	0.762519	0.771296	0.905017	0.42205	0.412716	0.45487	0.315788	0.361679	0.36556	0.398767	0.308093	0.198223	0.32128	0.183937	0.162417	0.0214247	0.0146877	-0.0170779	0.0183567	-0.0247998
179.594	0.839912	0.66529	0.739268	0.803626	0.726413	0.866778	0.43972	0.397124	0.427538	0.321354	0.349834	0.377684	0.426067	0.305138	0.207111	0.347077	0.203398	0.178262	0.0200047	0.0161875	-0.00921648	0.00887257	-0.0212158
183.585	0.895112	0.726351	0.825337	0.817288	0.740821	0.821933	0.435982	0.392804	0.436142	0.307941	0.354923	0.365918	0.419442	0.301469	0.209101	0.361326	0.203443	0.167114	0.013117	0.0197799	-0.0142911	0.00783958	-0.020449
187.576	0.90513	0.752459	0.774113	0.810164	0.768253	0.845998	0.426856	0.407688	0.423475	0.314864	0.355515	0.36815	0.387123	0.306778	0.192925	0.36495	0.197836	0.213735	0.014476	0.0130724	-0.0198427	0.00572166	-0.0233317
191.567	0.858255	0.712584	0.69759	0.779959	0.799637	0.885028	0.423844	0.407631	0.414277	0.335217	0.361936	0.366175	0.386546	0.303408	0.203754	0.399785	0.201435	0.202488	0.014953	0.0251423	-0.0275439	0.00905427	-0.0177478
195.558	0.905401	0.71864	0.746348	0.851216	0.720456	0.881846	0.424821	0.400112	0.433998	0.33983	0.397826	0.366387	0.393637	0.30528	0.210172	0.373549	0.196534	0.185432	0.0170042	0.0183093	-0.0286658	-0.00322844	-0.023705
199.549	0.879439	0.740221	0.747748	0.829152	0.821466	0.863452	0.428043	0.409748	0.414392	0.346183	0.396795	0.377162	0.384449	0.299951	0.211047	0.383556	0.209183	0.194098	0.0203951	0.0160929	-0.022771	0.0177633	-0.0183432
203.54	0.829806	0.724813	0.773113	0.843746	0.756279	0.893003	0.455528	0.419091	0.447464	0.371842	0.363832	0.364032	0.420476	0.3243	0.225389	0.349334	0.218001	0.188197	0.0202589	0.0148844	-0.0285236	0.00940944	-0.017156
207.531	0.885994	0.736396	0.810304	0.789751	0.735943	0.788543	0.439714	0.433982	0.455988	0.372376	0.373337	0.37732	0.427451	0.341696	0.240482	0.337314	0.205655	0.197271	0.0213773	0.0225879	-0.0261723	0.0135923	-0.00677995
211.522	0.907044	0.812632	0.80107	0.877709	0.787522	0.838888	0.446687	0.432026	0.445122	0.370282	0.366324	0.386734	0.408911	0.332218	0.218534	0.333749	0.211692	0.1974	0.010867	0.0191351	-0.0300025	0.0100868	-0.0264378
215.513	0.882951	0.806792	0.746372	0.839044	0.780771	0.883691	0.443663	0.408672	0.439749	0.355042	0.364069	0.398611	0.398948	0.325846	0.233412	0.341757	0.234481	0.167953	0.0197843	0.0221635	-0.0183688	0.0136536	-0.0209094
219.504	0.897396	0.767072	0.809547	0.855787	0.796271	0.834327	0.440811	0.403432	0.465779	0.355835	0.38737	0.384347	0.39199	0.347098	0.223832	0.362833	0.216895	0.204157	0.026007	0.0269498	-0.0372782	0.00612453	-0.0240059
223.495	0.905597	0.734575	0.762049	0.801697	0.776532	0.917512	0.455032	0.416639	0.441918	0.36342	0.380649	0.404846	0.418618	0.325354	0.23831	0.362662	0.230719	0.193025	0.0193742	0.0127793	-0.0392653	0.00535853	-0.0113984
227.486	0.902536	0.735161	0.794183	0.834911	0.786476	0.916544	0.428134	0.436179	0.445298	0.36013	0.386284	0.387208	0.398243	0.319131	0.251752	0.401317	0.236014	0.202397	0.0239608	0.0327483	-0.0286111	0.00574112	-0.0149731
231.477	0.945049	0.784576	0.737692	0.791029	0.769111	0.872875	0.468269	0.42693	0.457589	0.37662	0.380617	0.396504	0.393195	0.325135	0.251594	0.356737	0.243517	0.206091	0.0260438	0.0211153	-0.0306464	0.0104848	-0.0193016
235.468	0.931121	0.767071	0.772452	0.813796	0.776727	0.840188	0.455643	0.432473	0.457192	0.37087	0.369914	0.407969	0.391335	0.341193	0.241021	0.367405	0.230548	0.182044	0.0234824	0.0163844	-0.0267776	0.0168565	-0.0166022
239.459	0.908712	0.722478	0.778378	0.872727	0.706497	0.900114	0.480359	0.433462	0.461737	0.383579	0.385822	0.410137	0.399694	0.318494	0.226101	0.368295	0.22968	0.175812	0.0235328	0.0203607	-0.0373032	0.00363237	-0.013884
243.45	0.94959	0.750809	0.821871	0.824165	0.730083	0.906848	0.44715	0.421224	0.460456	0.379011	0.379458	0.417901	0.409318	0.31999	0.236026	0.374316	0.22776	0.194895	0.0241835	0.00867504	-0.0237758	0.00825837	-0.0181747
247.441	0.93251	0.746347	0.790899	0.877744	0.793569	0.882	0.444057	0.42032	0.444023	0.375582	0.377676	0.39123	0.425383	0.342552	0.234027	0.393801	0.238009	0.19427	0.0247831	0.0119971	-0.0247527	0.0105305	-0.0133119
251.432	1.00332	0.753977	0.7577	0.869185	0.699463	0.87551	0.465856	0.426872	0.46095	0.369278	0.363009	0.394554	0.422088	0.344275	0.250472	0.404187	0.239833	0.185111	0.0189137	0.00520859	-0.0127148	0.0103873	-0.0161818
255.423	0.933425	0.712578	0.732823	0.787713	0.743052	0.87214	0.466665	0.437507	0.466312	0.376733	0.39793	0.406981	0.427945	0.347308	0.256167	0.388894	0.244972	0.175687	0.0244209	0.0128114	-0.0173875	0.0111754	-0.00314533
259.414	0.970719	0.791035	0.758584	0.81225	0.743818	0.832618	0.45543	0.409455	0.461251	0.393463	0.378825	0.410792	0.448111	0.350812	0.262489	0.387386	0.245242	0.184844	0.0272229	0.0124159	-0.0304905	0.011602	-0.0050579
263.405	0.956865	0.754389	0.765716	0.846531	0.758164	0.836522	0.469182	0.413245	0.466658	0.376699	0.391559	0.391588	0.436712	0.334148	0.254014	0.386779	0.26349	0.215341	0.0281889	0.018879	-0.0185897	0.00661238	-0.00872307
267.396	0.93721	0.748202	0.754568	0.851406	0.760028	0.832309	0.465576	0.423319	0.493563	0.371304	0.386354	0.417599	0.461392	0.327888	0.253638	0.391697	0.253276	0.221549	0.026557	0.01521	-0.0161048	0.011279	-0.0152401
271.387	0.962793	0.763177	0.753137	0.831621	0.727429	0.865667	0.470639	0.407854	0.462026	0.381414	0.39455	0.414448	0.479281	0.344861	0.279281	0.397414	0.250193	0.220812	0.0302023	0.0143626	-0.0195524	0.0197635	-0.0140524
275.378	1.01607	0.760078	0.80129	0.858527	0.752839	0.818733	0.46862	0.426267	0.467738	0.387905	0.383553	0.417284	0.45764	0.336484	0.265738	0.383083	0.252316	0.201643	0.0283811	0.0179978	-0.00327352	0.0124785	-0.0194104
279.369	0.986514	0.777223	0.87688	0.863397	0.758294	0.890818	0.469778	0.434054	0.48598	0.414418	0.391242	0.424814	0.445844	0.354847	0.249163	0.385454	0.245551	0.199162	0.0246833	0.0100711	-0.0132357	0.00734645	-0.0143955
283.36	1.02396	0.860727	0.881143	0.923921	0.762159	0.852677	0.486782	0.437216	0.483268	0.402737	0.380358	0.415448	0.475447	0.333282	0.259835	0.41061	0.258946	0.197425	0.025191	0.0208139	-0.0193863	0.00894439	-0.00864951
287.351	1.0465	0.771035	0.803808	0.853575	0.681252	0.790005	0.48669	0.449306	0.451087	0.390962	0.37816	0.437379	0.449247	0.355217	0.26261	0.386882	0.232827	0.197776	0.0280508	0.0230343	-0.0215753	0.013099	-0.00993529
291.342	1.01375	0.785212	0.882322	0.859083	0.76935	0.908603	0.470623	0.439619	0.467764	0.38582	0.398884	0.447313	0.457322	0.336336	0.247472	0.385397	0.240637	0.192978	0.0273122	0.0100206	-0.0132778	0.0212836	-0.0113885
295.333	1.06536	0.762246	0.814324	0.864443	0.76419	0.857033	0.487601	0.44249	0.495981	0.383621	0.375895	0.432227	0.445023	0.349248	0.244899	0.390221	0.250746	0.215829	0.0269654	0.0113377	-0.0295077	0.00682481	-0.016768
299.324	1.07947	0.768911	0.794703	0.795984	0.772206	0.900505	0.473387	0.429834	0.462251	0.416889	0.40875	0.4345	0.481174	0.345895	0.280991	0.387283	0.245428	0.215154	0.0245602	0.0112787	-0.0234049	0.00843458	-0.017131
303.315	1.05622	0.836046	0.7952	0.917054	0.782445	0.852907	0.475383	0.440246	0.46297	0.399707	0.400336	0.465589	0.485591	0.345367	0.273811	0.3967	0.279849	0.227511	0.0245704	0.0124824	-0.0241169	0.0110938	-0.0130695
307.306	0.977	0.762341	0.805994	0.902466	0.741684	0.825696	0.497042	0.417143	0.486173	0.385516	0.397428	0.432237	0.485898	0.344388	0.273008	0.397741	0.247909	0.214196	0.031452	0.0127858	-0.0151189	0.00975021	-0.0203456
311.297	1.03403	0.826629	0.8328	0.855227	0.741083	0.856719	0.483149	0.431014	0.476447	0.401668	0.403365	0.448358	0.48247	0.353246	0.277861	0.375874	0.260239	0.214247	0.0210343	0.022394	-0.0249775	0.0135365	-0.028674
315.288	1.02014	0.789457	0.835068	0.900588	0.743992	0.874867	0.481369	0.488344	0.47069	0.395465	0.395522	0.454337	0.468558	0.343368	0.278022	0.395513	0.255252	0.231025	0.0272381	0.0175368	-0.0248427	0.0164729	-0.0118243
319.279	1.03993	0.825094	0.866905	0.852411	0.798855	0.802072	0.508623	0.451114	0.466728	0.390893	0.405571	0.455719	0.470322	0.3453	0.253287	0.41579	0.265069	0.206706	0.027771	0.0136087	-0.0292427	0.0147644	-0.0171001
323.27	1.06984	0.80026	0.822311	0.827397	0.806856	0.826279	0.519653	0.447011	0.48136	0.409809	0.421087	0.488654	0.475058	0.356824	0.273514	0.394466	0.257495	0.201604	0.0254568	0.0231536	-0.0286384	0.0140449	-0.010006
327.261	1.06458	0.816042	0.863356	0.844854	0.859141	0.880787	0.509408	0.431765	0.49382	0.402695	0.421765	0.475764	0.454637	0.351741	0.288601	0.409445	0.262751	0.227163	0.0268867	0.0116796	-0.0231393	0.0118466	-0.0161132
331.252	1.05982	0.839337	0.858724	0.856468	0.834809	0.885798	0.507472	0.471057	0.498568	0.381865	0.406862	0.451895	0.454127	0.372731	0.289515	0.418924	0.268689	0.239063	0.0290633	0.0159149	-0.0230352	0.0103408	-0.0237591
335.243	1.07207	0.869177	0.761691	0.834411	0.868158	0.862043	0.494803	0.454591	0.491555	0.404772	0.422618	0.458122	0.432276	0.367267	0.277819	0.427615	0.275238	0.207672	0.0253661	0.0183981	-0.0250284	0.0168999	-0.0255718
339.234	1.05448	0.823193	0.763538	0.817938	0.882929	0.900007	0.498227	0.467748	0.491818	0.402185	0.398568	0.44898	0.47521	0.360965	0.266045	0.437931	0.280635	0.213657	0.0273033	0.0159797	-0.0105375	0.0110755	-0.0201476
343.225	1.09622	0.832194	0.816891	0.899256	0.866788	0.862631	0.492036	0.465359	0.492675	0.413411	0.406967	0.467053	0.475739	0.371042	0.257847	0.430315	0.270753	0.218546	0.0194416	0.0205958	-0.0323516	0.0183487	-0.0113684
347.216	1.05737	0.855326	0.817343	0.9098	0.841374	0.854394	0.510389	0.453656	0.50661	0.388858	0.394882	0.452363	0.459176	0.374424	0.270574	0.435794	0.280624	0.170818	0.020544	0.0191162	-0.020385	0.012617	-0.00968883
351.207	1.10502	0.848887	0.864488	0.862151	0.843292	0.806792	0.520105	0.450408	0.51227	0.404149	0.413805	0.455414	0.479872	0.353556	0.27864	0.443829	0.264969	0.215738	0.0238971	0.0105906	-0.0310932	0.0228462	-0.0077466
355.198	1.066	0.80913	0.873741	0.852268	0.817211	0.895111	0.508842	0.477078	0.510679	0.417527	0.420639	0.473108	0.444365	0.355345	0.292645	0.429315	0.264383	0.238475	0.0212145	0.0158864	-0.0222508	0.00642784	-0.0145746
359.189	1.04396	0.828865	0.869662	0.802718	0.887566	0.837506	0.512332	0.453669	0.479967	0.389348	0.413211	0.457396	0.471872	0.370766	0.285143	0.43316	0.271163	0.230458	0.0194371	0.0100423	-0.03858	0.0159262	-0.00603323
363.18	1.12201	0.833462	0.920904	0.852723	0.857201	0.878477	0.552322	0.446701	0.498094	0.395177	0.418493	0.449728	0.464821	0.375225	0.268483	0.461276	0.289018	0.233212	0.0235334	0.0172438	-0.0351877	0.0103704	-0.0114693
367.171	1.17285	0.833469	0.845508	0.863816	0.830336	0.853335	0.514544	0.447223	0.490804	0.374523	0.413315	0.46475	0.470859	0.380669	0.285446	0.446076	0.286292	0.208163	0.019165	0.0119716	-0.0286847	0.0124213	-0.00290467
371.162	1.13846	0.829178	0.860697	0.902427	0.860508	0.798376	0.528824	0.440539	0.519518	0.408734	0.399771	0.460241	0.413898	0.371729	0.26023	0.463807	0.283046	0.224508	0.0211893	0.0188101	-0.0342781	0.0117714	-0.0174065
375.153	1.23922	0.865807	0.77253	0.868523	0.879735	0.830019	0.522921	0.449763	0.504874	0.414537	0.40372	0.475679	0.400529	0.362157	0.290888	0.445969	0.295503	0.22011	0.0180537	0.0167668	-0.0470826	0.0095934	-0.0148226
379.144	1.27497	0.85498	0.827953	0.817348	0.856847	0.791511	0.533182	0.440487	0.524753	0.41109	0.405861	0.488072	0.411474	0.36893	0.259318	0.472131	0.296791	0.209397	0.0219375	0.0184836	-0.0360313	0.01702	-0.00936513
383.135	1.14427	0.865107	0.871896	0.85561	0.856245	0.837031	0.543124	0.412969	0.508218	0.422827	0.397459	0.446632	0.411483	0.365016	0.289302	0.45384	0.30322	0.221794	0.0192053	0.021589	-0.0360051	0.0180571	-0.0172897
387.126	1.18168	0.812162	0.826598	0.867732	0.859321	0.812281	0.538801	0.425935	0.525757	0.413448	0.39822	0.454418	0.451516	0.367053	0.298748	0.428783	0.313842	0.222391	0.0178315	0.0182667	-0.0479107	0.0146203	-0.00806987
391.116	1.1283	0.854446	0.809154	0.833774	0.880362	0.808256	0.536141	0.46314	0.510401	0.415865	0.423314	0.462329	0.472091	0.376282	0.301346	0.46623	0.311612	0.22136	0.0144223	0.0164213	-0.0474128	0.0148868	-0.0107327
395.107	1.18662	0.910195	0.794192	0.882297	0.898837	0.868305	0.530892	0.469986	0.491907	0.429591	0.415844	0.482339	0.430823	0.363674	0.312651	0.481416	0.302317	0.223648	0.0224811	0.0209078	-0.0386443	0.0163024	-0.00754467
399.098	1.21205	0.845502	0.793061	0.864301	0.851082	0.816164	0.54271	0.491944	0.503446	0.412993	0.416744	0.47314	0.438247	0.374773	0.291752	0.468295	0.321052	0.191309	0.0231777	0.0246572	-0.0353084	0.00736603	-0.00250523
403.089	1.24668	0.883488	0.805652	0.890295	0.877804	0.842735	0.555596	0.476206	0.495398	0.408631	0.426363	0.485741	0.464106	0.375982	0.320814	0.482058	0.30716	0.22075	0.0221081	0.0248044	-0.0528575	0.0235758	-0.00321952
407.08	1.1954	0.853652	0.867335	0.862969	0.847408	0.778942	0.54039	0.447314	0.501868	0.434834	0.427935	0.461394	0.463097	0.385695	0.315876	0.457962	0.310929	0.203501	0.0238958	0.0188487	-0.0456844	0.0190999	-0.0174402
411.071	1.18558	0.919449	0.86651	0.85322	0.870327	0.759304	0.553307	0.418296	0.495968	0.415143	0.417911	0.465377	0.465847	0.373248	0.307536	0.461498	0.286206	0.225106	0.0191853	0.0132691	-0.0414028	0.0231368	-0.00567309
415.062	1.26568	0.87658	0.858772	0.894194	0.92915	0.882292	0.542247	0.459991	0.485271	0.427126	0.432859	0.479319	0.473887	0.398063	0.311801	0.468196	0.298926	0.201758	0.0207511	0.0174325	-0.0577709	0.0250897	-0.00705512
419.053	1.2019	0.835312	0.885162	0.877464	0.902112	0.803113	0.541686	0.470768	0.501883	0.436943	0.43588	0.472415	0.473997	0.381293	0.324898	0.486394	0.302528	0.185826	0.0180743	0.0241992	-0.0345077	0.0245231	-0.00402416
423.044	1.27695	0.857627	0.886424	0.851955	0.896551	0.809736	0.5286	0.465371	0.502957	0.449789	0.422099	0.481291	0.471174	0.386726	0.324508	0.492531	0.306729	0.227224	0.0181257	0.0173259	-0.0379015	0.018799	0.00412893
427.035	1.17081	0.867453	0.933598	0.850482	0.840845	0.848328	0.544728	0.473074	0.508182	0.403057	0.451202	0.477117	0.484515	0.384477	0.319678	0.47849	0.307239	0.233847	0.026237	0.0137668	-0.0521894	0.0274453	-0.00753899
431.026	1.3523	0.892096	0.866085	0.861441	0.870773	0.841681	0.534458	0.467735	0.484117	0.433813	0.431179	0.492799	0.469335	0.381737	0.317436	0.496417	0.332242	0.209937	0.0191078	0.0183531	-0.0290267	0.0139142	-0.00707984
435.017	1.23951	0.870132	0.87201	0.885657	0.898108	0.886927	0.534795	0.464548	0.499823	0.405379	0.455939	0.49482	0.477468	0.389336	0.317084	0.505603	0.309061	0.198611	0.0207103	0.0266046	-0.0343774	0.0155645	-0.0148873
439.008	1.30629	0.924623	0.856259	0.856646	0.92281	0.842858	0.549153	0.493184	0.518277	0.402918	0.440311	0.484247	0.507323	0.372801	0.299514	0.48539	0.323473	0.237235	0.0122255	0.0190264	-0.027193	0.014872	-0.0118687
442.999	1.30661	0.880101	0.853692	0.899869	0.908702	0.837452	0.547715	0.488735	0.545433	0.409899	0.435828	0.510645	0.489209	0.374081	0.308724	0.495576	0.312011	0.184612	0.0208326	0.0233413	-0.0294891	0.0106721	0.00249391
446.99	1.30256	0.899786	0.84062	0.839865	0.970979	0.852492	0.561217	0.508683	0.511645	0.415816	0.43391	0.515559	0.502056	0.403659	0.309401	0.507139	0.298162	0.227705	0.0132408	0.0142674	-0.034744	0.0119871	0.0072748
450.981	1.28087	0.847452	0.944618	0.868837	0.900368	0.864808	0.557106	0.512864	0.516323	0.411968	0.443205	0.516268	0.506935	0.395625	0.311904	0.511341	0.302562	0.205539	0.0174794	0.00918704	-0.0323975	0.0175209	-0.0045013
454.972	1.14346	0.882935	0.906984	0.884826	0.879583	0.820435	0.534992	0.507592	0.523465	0.40857	0.443222	0.519133	0.525869	0.386464	0.292822	0.538544	0.299357	0.204336	0.0130886	0.00364928	-0.0476372	0.0109891	-0.00653994
458.963	1.14283	0.874423	0.885867	0.869094	0.867005	0.869912	0.546331	0.49397	0.510373	0.441341	0.429448	0.520348	0.481161	0.389952	0.310804	0.523296	0.307341	0.240036	0.0205735	0.0137408	-0.0337012	0.0130075	0.00563437
462.954	1.10398	0.817831	0.867255	0.873418	0.849734	0.789605	0.561331	0.514841	0.5172	0.445061	0.421131	0.506182	0.466605	0.385745	0.300045	0.521281	0.307172	0.245979	0.0229157	0.0109337	-0.0371177	0.0127546	0.00402694
466.945	1.11977	0.871253	0.849669	0.860471	0.853308	0.821074	0.559249	0.516657	0.527166	0.411395	0.426191	0.538389	0.493812	0.388109	0.290125	0.529381	0.296946	0.227572	0.0168432	0.0188338	-0.0329761	0.0135012	-0.00273653
470.936	1.11875	0.871009	0.911003	0.886031	0.876084	0.834961	0.568049	0.532135	0.509863	0.405508	0.438341	0.521613	0.479689	0.403433	0.31686	0.516158	0.314385	0.176927	0.0209212	0.00966748	-0.0380424	0.014613	-0.00455299
474.927	1.1407	0.829889	0.917507	0.943533	0.848468	0.809447	0.574326	0.529943	0.527952	0.40483	0.430985	0.504638	0.445885	0.402134	0.314322	0.509406	0.321909	0.24889	0.0244985	0.0097862	-0.0379682	0.0120085	0.00842304
478.918	1.07535	0.834758	0.833552	0.907854	0.894877	0.805617	0.56706	0.549544	0.535968	0.409172	0.441336	0.55791	0.448562	0.391396	0.32097	0.509242	0.317467	0.220621	0.0240132	0.0135925	-0.0292184	0.0229443	0.00481187
482.909	1.08703	0.874075	0.902374	0.903822	0.914508	0.754919	0.564818	0.541964	0.510926	0.447306	0.419031	0.568142	0.487249	0.419248	0.324083	0.502656	0.331705	0.20306	0.0272281	0.0121289	-0.0315759	0.013618	0.00107348
486.9	1.13638	0.899486	0.909915	0.898103	0.898434	0.85882	0.542813	0.522504	0.54744	0.438643	0.432432	0.541449	0.485185	0.407523	0.340288	0.513436	0.307472	0.228475	0.0269725	0.0238997	-0.0482923	0.0172025	0.00839217
490.891	1.20684	0.817472	0.891168	0.854898	0.891381	0.805717	0.552706	0.512898	0.523727	0.420951	0.443414	0.534404	0.494851	0.40397	0.315819	0.509627	0.29847	0.202626	0.018289	0.0171713	-0.0334735	0.0112939	0.00724389
494.882	1.23146	0.834561	0.951273	0.861405	0.881466	0.815952	0.55909	0.521852	0.526398	0.415074	0.444481	0.554429	0.481208	0.41209	0.309269	0.525299	0.320129	0.228185	0.0160499	0.0160227	-0.0305902	0.0196807	0.0105914
498.873	1.13528	0.852136	0.895266	0.8463	0.880908	0.796319	0.566446	0.536028	0.54501	0.435973	0.439638	0.555333	0.475707	0.409672	0.308769	0.528099	0.310436	0.232677	0.0216378	0.0174731	-0.046194	0.025464	0.0121583
502.864	1.08568	0.853997	0.850964	0.885361	0.919569	0.80768	0.561523	0.526427	0.533372	0.423818	0.432867	0.527249	0.478546	0.396185	0.312829	0.510856	0.315207	0.213576	0.022477	0.0170613	-0.0514923	0.00876319	-0.0071928
506.855	1.18207	0.82049	0.901634	0.862604	0.908148	0.781798	0.586345	0.536781	0.533478	0.407057	0.430118	0.509456	0.485934	0.421226	0.317799	0.503148	0.311585	0.222107	0.0109704	0.0122325	-0.0434649	0.0119157	-0.00583221
510.846	1.12303	0.826733	0.937845	0.876073	0.871169	0.746802	0.566841	0.535423	0.52937	0.425344	0.435307	0.508695	0.501151	0.418511	0.323889	0.529475	0.32836	0.243679	0.020673	0.0117041	-0.0435916	0.00906721	0.00329773
514.837	1.23751	0.796996	0.891345	0.873302	0.884037	0.831735	0.590025	0.526869	0.538743	0.448983	0.418641	0.516104	0.487302	0.424447	0.309381	0.54267	0.328695	0.234466	0.017953	0.0133997	-0.0498378	0.0176511	0.0106908
518.828	1.17167	0.848691	0.92488	0.906528	0.886307	0.85009	0.559208	0.523481	0.53424	0.434606	0.435511	0.53842	0.476976	0.424123	0.322197	0.523674	0.32077	0.229231	0.0160861	0.00502434	-0.0642793	0.0100203	-0.00746648
522.819	1.12633	0.883176	0.908659	0.895501	0.927064	0.878239	0.579326	0.523543	0.540156	0.424619	0.421844	0.515289	0.504583	0.426833	0.333193	0.49106	0.340419	0.221049	0.0158579	0.00566182	-0.0633561	0.00901545	-0.00519605
526.81	1.17031	0.848772	0.959263	0.938813	0.907322	0.82552	0.562373	0.520742	0.551654	0.436123	0.435287	0.513435	0.519603	0.421786	0.334511	0.503943	0.315094	0.272025	0.0141615	0.00974924	-0.0515479	0.00774318	0.00070629
530.801	1.19979	0.86168	0.88767	0.872941	0.908597	0.794793	0.578899	0.5085	0.550193	0.428366	0.429956	0.518221	0.509069	0.408108	0.334981	0.506281	0.341743	0.251364	0.0190196	0.0145162	-0.0480798	0.00505773	0.00198896
534.792	1.09106	0.872448	0.840477	0.919767	0.927702	0.871636	0.574023	0.519833	0.543592	0.452139	0.429922	0.488081	0.519371	0.428237	0.340434	0.515022	0.31919	0.249781	0.0169491	0.014654	-0.0449477	0.0156866	-0.015303
538.783	1.1443	0.840534	0.861049	0.939218	0.863845	0.8458	0.588209	0.528041	0.54257	0.441045	0.456346	0.507387	0.511088	0.429918	0.33767	0.531228	0.326142	0.268407	0.0210802	0.0169113	-0.0452438	0.00856052	-0.00440599
542.774	1.13292	0.823886	0.833994	0.917361	0.866274	0.847189	0.57082	0.52976	0.529556	0.453968	0.436348	0.502242	0.490888	0.445115	0.320825	0.537044	0.344077	0.252842	0.021381	0.017893	-0.0370152	0.0137359	0.00225535
546.765	1.07866	0.815419	0.908508	0.815765	0.848042	0.765674	0.560501	0.518406	0.544242	0.447519	0.410819	0.502103	0.473858	0.440956	0.353354	0.522867	0.333883	0.273103	0.0190762	0.013577	-0.0326594	0.0171844	-0.0108041
550.756	1.09825	0.803459	0.843911	0.937466	0.848014	0.77929	0.566571	0.516739	0.546399	0.433216	0.434413	0.507623	0.500664	0.439628	0.34972	0.514497	0.362867	0.247826	0.0206742	0.0107296	-0.0466763	0.00305802	-0.00484139
554.747	1.06825	0.845184	0.881623	0.905817	0.862825	0.794546	0.545293	0.543308	0.531888	0.432571	0.411649	0.512776	0.492122	0.436454	0.344241	0.509473	0.337933	0.217422	0.0177291	0.0126652	-0.0341947	0.0094132	-0.00888854
558.738	1.11967	0.86811	0.925189	0.916583	0.847704	0.880542	0.546945	0.526486	0.546346	0.422501	0.429955	0.507109	0.493734	0.437782	0.35653	0.526419	0.335746	0.253126	0.0200318	0.0148929	-0.0491239	0.018855	-0.0127859
562.729	1.10035	0.881168	0.862223	0.875418	0.836835	0.841924	0.570074	0.533073	0.540496	0.447058	0.417738	0.501489	0.510174	0.439905	0.348737	0.533395	0.342301	0.232406	0.0274618	0.0229022	-0.0293922	0.0117082	-0.00919544
566.72	1.09444	0.882651	0.826432	0.851373	0.857775	0.848768	0.567571	0.573127	0.532043	0.444718	0.432452	0.504962	0.550539	0.44679	0.342952	0.518166	0.344624	0.246424	0.0234656	0.0103399	-0.0516528	0.0123166	0.00189668
570.711	1.05429	0.886684	0.868051	0.860404	0.830664	0.806864	0.568071	0.554358	0.543598	0.45216	0.422504	0.516584	0.520448	0.445464	0.348291	0.526557	0.354864	0.25007	0.0252637	0.014459	-0.0455866	0.012106	-0.00445155
574.702	1.10791	0.831469	0.756892	0.901292	0.850525	0.866807	0.556343	0.548955	0.542897	0.427027	0.42991	0.513816	0.503628	0.4514	0.348254	0.507895	0.358035	0.223566	0.0171966	0.0169455	-0.0341271	0.0109685	-0.0114231
578.693	1.12173	0.85345	0.752179	0.908307	0.871324	0.865922	0.562886	0.560855	0.536706	0.429979	0.42361	0.52139	0.473451	0.449961	0.356794	0.513131	0.367259	0.236492	0.0216746	0.0106801	-0.0485015	0.0114946	-0.00866423
582.684	1.08177	0.854724	0.766876	0.909792	0.877456	0.851839	0.579491	0.558792	0.551721	0.432837	0.434878	0.508481	0.46292	0.447225	0.353515	0.49839	0.363325	0.241683	0.0230993	0.0149378	-0.049545	0.00353116	0.00248114
586.675	1.07045	0.820494	0.848143	0.925952	0.823953	0.889721	0.555082	0.563635	0.552008	0.454338	0.428629	0.518379	0.440916	0.449567	0.328535	0.499327	0.350438	0.246632	0.0172442	0.016488	-0.0480272	0.00775888	-0.00904714
590.666	1.09923	0.829624	0.88463	0.947329	0.800338	0.807289	0.565514	0.538717	0.538057	0.465382	0.42568	0.538184	0.462674	0.467592	0.340947	0.511301	0.363334	0.248373	0.0235543	0.0129141	-0.0439916	0.0130369	0.00101053
594.657	1.0126	0.868774	0.876724	0.9615	0.86024	0.854087	0.562257	0.552261	0.55084	0.455059	0.445793	0.514681	0.469432	0.452959	0.339775	0.535922	0.361367	0.268265	0.0237573	0.0253339	-0.0417282	0.00494373	-0.00481
598.648	1.08413	0.829224	0.848908	0.893069	0.832227	0.84092	0.546078	0.543336	0.54481	0.470719	0.426519	0.512909	0.475434	0.45521	0.346678	0.497966	0.375891	0.256096	0.0212768	0.02362	-0.0376993	0.0103067	0.00108355
602.639	1.07054	0.885771	0.797044	0.923199	0.854688	0.830419	0.574966	0.57519	0.539819	0.44794	0.416724	0.559879	0.496796	0.458231	0.349814	0.525898	0.375173	0.240239	0.0261908	0.0157123	-0.0278483	0.00748517	0.00857537
606.63	1.08954	0.843581	0.904266	0.914305	0.873798	0.779156	0.58178	0.568778	0.539589	0.474989	0.430121	0.541712	0.490735	0.450382	0.333251	0.528395	0.371082	0.228884	0.0257182	0.0180877	-0.0344199	0.011935	0.000705368
610.621	1.08013	0.841748	0.852328	0.903483	0.86126	0.780299	0.554379	0.566958	0.537619	0.465676	0.434736	0.542016	0.479449	0.477072	0.362668	0.530116	0.362866	0.246102	0.0272199	0.0231261	-0.0375447	0.0145623	0.00213408
614.612	1.03988	0.837499	0.821634	1.00718	0.878242	0.796432	0.575111	0.555598	0.545429	0.444022	0.472642	0.549728	0.506879	0.463678	0.33911	0.5358	0.362237	0.229018	0.0236475	0.0172466	-0.0443793	0.00676016	0.00647761
618.603	1.07058	0.85599	0.919021	0.92222	0.810801	0.784489	0.545866	0.558948	0.54758	0.437215	0.439378	0.532008	0.510252	0.44991	0.358321	0.556006	0.378603	0.251821	0.0308918	0.0186941	-0.0272297	0.00790759	-0.000951716
622.594	1.04469	0.855354	0.870922	0.918775	0.819592	0.7933	0.559439	0.574587	0.547129	0.456836	0.435599	0.538623	0.502218	0.458925	0.33737	0.551812	0.381316	0.239121	0.0292682	0.0194843	-0.0292586	0.0148396	-6.67836e-06
626.585	1.03082	0.866118	0.82682	0.866769	0.849126	0.886407	0.568704	0.589914	0.538589	0.476264	0.433732	0.570474	0.504872	0.472523	0.36665	0.561062	0.369294	0.253875	0.0269668	0.0173692	-0.0163273	0.0133755	6.66198e-05
630.576	1.03783	0.860012	0.880846	0.869904	0.840318	0.805599	0.558289	0.558579	0.527022	0.451792	0.431769	0.552722	0.483252	0.497436	0.359681	0.54524	0.371219	0.232395	0.0278748	0.0185372	-0.0390122	0.0071271	0.0038546
634.567	1.02417	0.836362	0.876641	0.884301	0.802761	0.772046	0.55445	0.571403	0.551841	0.468334	0.43839	0.552896	0.52017	0.485702	0.360195	0.551383	0.382646	0.25721	0.0297861	0.0152812	-0.0407574	0.0168171	0.00453298
638.558	1.02719	0.873923	0.855045	0.911651	0.872699	0.783855	0.575361	0.556704	0.53794	0.44606	0.421942	0.577072	0.487101	0.479004	0.371763	0.535486	0.365447	0.25988	0.0279413	0.0235527	-0.0227108	0.0164529	-0.00294251
642.549	1.01958	0.841779	0.939135	0.904648	0.877454	0.79821	0.570559	0.553705	0.580896	0.461203	0.430605	0.56254	0.486984	0.487363	0.35967	0.530868	0.396614	0.242967	0.028551	0.0178993	-0.0207075	0.0126951	-0.00415833
646.539	1.07667	0.907432	0.864268	0.923383	0.83777	0.851602	0.581106	0.56293	0.547723	0.449991	0.448225	0.546341	0.489719	0.486012	0.354061	0.53889	0.400074	0.255918	0.0276748	0.0266575	-0.0183651	0.011464	-0.00136345
650.531	1.05914	0.889046	0.884743	0.942222	0.831124	0.855358	0.575577	0.549586	0.552823	0.466344	0.449628	0.560258	0.506929	0.478942	0.369319	0.531757	0.380347	0.246701	0.0295338	0.016126	-0.0277484	0.012955	-0.000658336
654.521	1.01171	0.892078	0.859353	0.922164	0.85005	0.805407	0.566482	0.536617	0.554383	0.46239	0.451781	0.568879	0.507605	0.481227	0.387452	0.53424	0.384693	0.28587	0.0305852	0.014535	-0.0270462	0.0122369	0.00213566
658.512	1.00846	0.920601	0.913861	0.83917	0.897051	0.870408	0.557518	0.525275	0.550556	0.460834	0.443061	0.574026	0.50065	0.491045	0.37249	0.536417	0.385078	0.259485	0.0282069	0.0155349	-0.0359118	0.0226042	0.00440147
662.503	1.07285	0.939913	0.923521	0.881309	0.891811	0.902681	0.571601	0.516117	0.553304	0.468081	0.471042	0.570307	0.513405	0.476148	0.364094	0.529409	0.380534	0.271582	0.0261231	0.0218214	-0.0365091	0.0130746	0.00856541
666.494	0.989279	0.938564	1.02399	0.882357	0.854075	0.845619	0.557531	0.524414	0.564965	0.466005	0.456377	0.561446	0.512211	0.481067	0.363303	0.541527	0.392896	0.262597	0.028669	0.0152541	-0.0379597	0.0159617	0.00242567
670.485	0.980829	0.936309	0.910328	0.879891	0.833231	0.796207	0.575796	0.538789	0.549739	0.468713	0.453535	0.554874	0.519584	0.474974	0.364655	0.534688	0.38801	0.287376	0.0261248	0.017136	-0.0319733	0.0148415	0.0103394
674.476	1.03425	0.888827	0.948559	0.907683	0.880888	0.845162	0.5872	0.541331	0.559849	0.444929	0.458909	0.547585	0.494528	0.484862	0.375575	0.544576	0.392479	0.284362	0.022887	0.0210201	-0.0310242	0.0133202	0.0114533
678.467	1.08785	0.924457	0.869086	0.906734	0.874837	0.887444	0.575028	0.553085	0.563588	0.43903	0.467063	0.563449	0.48984	0.468113	0.360736	0.549341	0.400889	0.298576	0.0302115	0.013668	-0.0395742	0.0162952	0.000456686
682.458	1.08996	0.871423	0.883439	0.909057	0.87913	0.897179	0.606495	0.551023	0.559855	0.471527	0.446689	0.569279	0.489644	0.455237	0.360672	0.532189	0.387402	0.289031	0.0320703	0.0161397	-0.0220718	0.0246297	0.0099718
686.449	1.02685	0.916725	0.952908	0.86545	0.855186	0.910816	0.596995	0.586062	0.541619	0.487723	0.44617	0.557027	0.500384	0.479538	0.382806	0.52323	0.36397	0.295614	0.0375262	0.0178382	-0.0280191	0.0269217	0.01365
690.44	0.999034	0.881879	1.05146	0.953334	0.870657	0.86184	0.585586	0.580832	0.550305	0.464595	0.465283	0.558384	0.487593	0.463984	0.37588	0.510884	0.379273	0.303627	0.0371451	0.0233325	-0.0193944	0.0184562	-0.00675425
694.431	1.02908	0.907975	0.874237	0.878093	0.886596	0.913138	0.591652	0.583935	0.536988	0.48094	0.466411	0.574008	0.497341	0.471638	0.365291	0.533558	0.386981	0.324858	0.0342015	0.0226808	-0.0336425	0.0223783	0.00127144
698.422	0.997567	0.981257	0.88149	0.876348	0.885906	0.853714	0.597197	0.593161	0.544502	0.437807	0.472796	0.57249	0.479587	0.458653	0.384399	0.523102	0.372522	0.315776	0.0323898	0.0233243	-0.0312732	0.0244909	0.00645194
702.413	1.05429	0.919983	0.864902	0.893785	0.870038	0.815286	0.584065	0.572472	0.547813	0.478002	0.45446	0.575615	0.504533	0.468954	0.386059	0.554199	0.374582	0.293451	0.0366056	0.0238606	-0.0250833	0.0199903	-0.00457305
706.404	1.0383	0.891208	0.911367	0.91968	0.927885	0.781931	0.585512	0.559879	0.538206	0.509609	0.460578	0.589591	0.510668	0.483287	0.375068	0.526666	0.376936	0.318545	0.0350876	0.0289634	-0.027548	0.0265457	0.00493499
710.395	1.04933	0.943077	0.867933	0.900224	0.91131	0.792988	0.578334	0.577982	0.567856	0.460993	0.46252	0.589261	0.500897	0.473851	0.364817	0.523926	0.3703	0.285077	0.0385432	0.0285964	-0.0349572	0.0306035	0.00231999
714.386	1.10248	0.919115	0.923246	0.829798	0.904672	0.780131	0.592484	0.580819	0.572137	0.464145	0.461743	0.57159	0.546449	0.476158	0.354854	0.521712	0.38718	0.313153	0.0315972	0.0250779	-0.0343459	0.0150587	-0.000329146
718.377	1.07326	0.881892	0.872374	0.815264	0.901083	0.829427	0.58586	0.582785	0.554887	0.478068	0.465012	0.587206	0.501979	0.483836	0.371154	0.561559	0.405205	0.317137	0.0286908	0.022319	-0.0228507	0.0170028	0.000479934
722.368	1.02801	0.910264	0.889073	0.866924	0.911306	0.893325	0.59181	0.591713	0.570667	0.481297	0.455283	0.596013	0.514233	0.472601	0.371598	0.559529	0.385473	0.302908	0.0361788	0.0209456	-0.0323092	0.018573	0.00763471
726.359	0.978148	0.900173	0.923923	0.84918	0.901188	0.833435	0.595541	0.557613	0.562716	0.488156	0.46601	0.576018	0.504873	0.474295	0.381894	0.52044	0.378292	0.31037	0.0296421	0.0203584	-0.0330084	0.0220555	0.00138725
730.35	0.999144	0.891401	0.954212	0.911112	0.875674	0.795763	0.584007	0.568608	0.561265	0.478413	0.453457	0.577488	0.501011	0.472343	0.370844	0.545138	0.382595	0.27799	0.0300731	0.0170359	-0.020135	0.0211833	0.00289035
734.341	1.04201	0.864117	0.915701	0.887918	0.871954	0.809069	0.580195	0.572436	0.572047	0.480781	0.449838	0.57213	0.473055	0.457871	0.352453	0.531469	0.380136	0.33528	0.037212	0.0183695	-0.0379716	0.0240978	0.0120927
738.332	1.04541	0.895419	0.912149	0.850122	0.921399	0.728439	0.578413	0.583314	0.570239	0.495293	0.448846	0.566364	0.492358	0.492084	0.377951	0.534165	0.381887	0.305509	0.0364153	0.0235459	-0.0318703	0.0118255	-2.16702e-05
742.323	1.0061	0.87249	0.861081	0.847661	0.910405	0.822682	0.566018	0.573588	0.579686	0.498953	0.457578	0.565596	0.500072	0.484891	0.379492	0.554342	0.402232	0.323029	0.0292355	0.0217224	-0.0290148	0.0174876	0.00434071
746.314	0.990385	0.848518	0.888195	0.859471	0.903494	0.706001	0.588233	0.557339	0.57062	0.487009	0.443584	0.54469	0.495751	0.484105	0.375171	0.529377	0.416772	0.302881	0.0409594	0.0328965	-0.0355159	0.0239022	-0.00373119
750.305	1.01333	0.941922	0.921348	0.911557	0.845651	0.741793	0.589957	0.574806	0.586611	0.519728	0.446113	0.548535	0.489128	0.493937	0.373972	0.531182	0.44672	0.314979	0.0369534	0.0177085	-0.0304103	0.0189776	-3.71779e-05
754.296	0.976492	0.894436	0.871143	0.850219	0.874073	0.712747	0.581353	0.594606	0.555512	0.528398	0.453589	0.571634	0.503633	0.456096	0.369886	0.535769	0.415595	0.298377	0.0290361	0.0173678	-0.027522	0.022511	0.00279177
758.287	1.00767	0.882604	0.891705	0.908152	0.843517	0.815765	0.58721	0.567591	0.560899	0.509278	0.453754	0.563813	0.49709	0.494174	0.356922	0.535648	0.428518	0.303343	0.0310755	0.0283027	-0.0225775	0.00962009	0.00673233
762.278	1.03283	0.879018	0.90333	0.871112	0.956056	0.792969	0.564533	0.563343	0.590815	0.531066	0.449855	0.576154	0.472649	0.494548	0.384963	0.568206	0.392188	0.338619	0.0343572	0.026327	-0.0182274	0.0185659	0.00253227
766.269	1.02045	0.907762	0.848705	0.87789	0.927666	0.762685	0.560118	0.568234	0.573265	0.512218	0.449989	0.578582	0.531088	0.482557	0.380856	0.531374	0.387601	0.328236	0.0334567	0.0245322	-0.0311276	0.0162288	-0.00961919
770.26	1.03995	0.914768	0.929696	0.855693	0.869071	0.818956	0.586535	0.570316	0.569176	0.497256	0.444176	0.594586	0.490435	0.480957	0.368144	0.533475	0.377998	0.321407	0.0317297	0.0262818	-0.0324627	0.0147914	-0.011783
774.251	1.01483	0.955919	0.870323	0.842668	0.851926	0.781292	0.579648	0.574223	0.553897	0.506567	0.436264	0.588661	0.488663	0.486624	0.379181	0.543239	0.379709	0.30312	0.0307027	0.0211335	-0.0394012	0.0144411	0.00137658
778.242	1.06323	0.880599	0.949144	0.871636	0.887432	0.82161	0.583859	0.559223	0.571299	0.532112	0.453205	0.600178	0.524144	0.478511	0.379055	0.524925	0.397771	0.308982	0.0293298	0.0220928	-0.0361809	0.0175125	-0.00195849
782.233	1.10086	0.964701	1.00343	0.840337	0.889982	0.826742	0.592999	0.574843	0.568983	0.515738	0.450896	0.603804	0.512484	0.457332	0.362384	0.523762	0.382565	0.326065	0.0342026	0.0157286	-0.0287951	0.0201702	-0.00811862
786.224	1.06701	0.927953	0.946054	0.838643	0.873677	0.834086	0.582253	0.566026	0.56323	0.514114	0.462244	0.573184	0.545683	0.470595	0.381802	0.52801	0.37784	0.303505	0.0302054	0.0227412	-0.0215215	0.0107052	-0.00544148
790.215	1.08428	0.939077	0.963133	0.820627	0.874796	0.801686	0.581822	0.564973	0.567929	0.499247	0.453829	0.577138	0.531987	0.477688	0.391208	0.532219	0.380644	0.313722	0.0314721	0.0207848	-0.0184899	0.0182201	-0.00377397
794.206	1.13046	0.939337	0.986427	0.860861	0.918454	0.753548	0.586732	0.573425	0.597832	0.509839	0.438489	0.601398	0.544028	0.474142	0.375958	0.537019	0.366782	0.339753	0.0248907	0.0246948	-0.0149192	0.0149597	0.00340112
798.197	1.05684	0.944179	1.02534	0.884642	0.917798	0.845385	0.583739	0.558796	0.581279	0.518468	0.459637	0.600642	0.51186	0.47873	0.366483	0.533601	0.383917	0.326859	0.0294024	0.0194064	-0.0286463	0.0156285	-0.00105638
802.188	1.15115	0.94673	1.05276	0.926314	0.854832	0.844286	0.581773	0.565995	0.578422	0.52999	0.461331	0.596919	0.52195	0.495279	0.396055	0.505456	0.367117	0.335948	0.023545	0.0192655	-0.0307943	0.00763279	-0.00707646
806.179	1.11421	0.932182	0.964652	0.858035	0.888752	0.832709	0.604042	0.562313	0.592044	0.513823	0.442424	0.62325	0.520027	0.472021	0.376392	0.520729	0.365207	0.311757	0.0302691	0.0184047	-0.0292389	0.0153768	0.00257875
810.17	1.13269	0.958062	1.03912	0.890079	0.888108	0.780522	0.582727	0.561988	0.55223	0.520605	0.470921	0.615533	0.533947	0.46891	0.39934	0.53722	0.385745	0.322157	0.0285071	0.0250089	-0.0291336	0.0191832	-0.00140415
814.161	1.09153	0.900421	0.992515	0.901279	0.871466	0.890847	0.571203	0.594136	0.595635	0.504694	0.437372	0.576804	0.515053	0.467823	0.384307	0.525054	0.391591	0.320022	0.0391699	0.0293279	-0.0293039	0.0305257	-0.00073054
818.152	1.12052	0.957352	1.05323	0.939641	0.879977	0.733615	0.576883	0.5778	0.576053	0.543768	0.453576	0.557248	0.522296	0.475255	0.376214	0.526321	0.399579	0.332315	0.0399739	0.0158	-0.0410714	0.0250789	0.000716932
822.143	1.13943	0.958542	1.0151	0.940183	0.889398	0.801885	0.56982	0.573017	0.58776	0.539489	0.462418	0.56064	0.527886	0.470453	0.397808	0.528428	0.367757	0.341927	0.0361004	0.0271271	-0.0192683	0.0176618	0.000948729
826.134	1.07504	0.965524	0.971359	0.892269	0.843816	0.754294	0.549355	0.562414	0.573742	0.541662	0.465128	0.558308	0.497378	0.483032	0.396835	0.515031	0.407068	0.324933	0.0393355	0.0229291	-0.0346844	0.0196818	-0.00693529
830.125	1.13044	0.952545	1.02971	0.874389	0.869457	0.865289	0.550255	0.590183	0.587503	0.539542	0.44704	0.573133	0.496584	0.469459	0.390381	0.509676	0.382485	0.340215	0.0290794	0.0320407	-0.037408	0.0113582	-0.00668124
834.116	1.05774	0.930917	1.02985	0.87644	0.863977	0.833827	0.559171	0.573137	0.592081	0.519428	0.451482	0.57835	0.501154	0.490384	0.396237	0.509521	0.397217	0.343158	0.0437307	0.0248114	-0.0350904	0.0210607	-0.0091539
838.107	1.05808	0.928867	1.07747	0.884043	0.889374	0.877997	0.5594	0.583161	0.594486	0.525902	0.442455	0.572136	0.513839	0.495044	0.399909	0.499513	0.371797	0.347594	0.0422153	0.0247594	-0.0328439	0.0232223	-0.00123697
842.098	1.02888	0.933897	1.04946	0.868026	0.921628	0.79632	0.577543	0.579758	0.596378	0.551097	0.460828	0.583382	0.522571	0.492767	0.397361	0.502014	0.398691	0.343255	0.0440971	0.0308849	-0.0359341	0.0251439	-0.00341884
846.089	1.03623	0.906863	1.01354	0.90824	0.942331	0.805154	0.591977	0.582181	0.605492	0.532795	0.430531	0.587838	0.517643	0.485037	0.399495	0.49989	0.389355	0.364878	0.0377226	0.0259433	-0.0238812	0.0156876	0.000329517
850.08	1.05817	0.896675	0.941293	0.861947	0.872145	0.869412	0.60435	0.585043	0.58365	0.536929	0.445303	0.584933	0.533759	0.477354	0.379134	0.521735	0.397945	0.367076	0.0319119	0.0279853	-0.041604	0.0181914	0.00154411
854.071	1.03438	0.878757	1.01622	0.909335	0.860743	0.911809	0.576779	0.580945	0.584964	0.544238	0.445278	0.578436	0.524825	0.491125	0.394105	0.553799	0.403017	0.34075	0.0319241	0.0365515	-0.0485406	0.00923784	0.00994139
858.062	1.0378	0.88772	0.886038	0.896632	0.856184	0.895397	0.561762	0.560028	0.581335	0.543062	0.458534	0.579323	0.514056	0.472727	0.397956	0.53161	0.424699	0.351919	0.0275435	0.0268605	-0.0330144	0.0151004	0.0128195
862.053	1.02448	0.922525	1.00795	0.902435	0.850917	0.850463	0.59508	0.580676	0.588726	0.544816	0.458761	0.570739	0.513699	0.467189	0.387165	0.552503	0.400707	0.356533	0.0334996	0.0244611	-0.0456355	0.0148672	0.00104909
866.044	1.00298	0.903479	0.878458	0.897771	0.845078	0.789873	0.588328	0.579196	0.578847	0.552461	0.458637	0.544539	0.541197	0.498738	0.399607	0.518205	0.415168	0.350286	0.032279	0.0263183	-0.0342717	0.0174277	-0.00316249
870.035	1.01027	0.915315	0.925044	0.905848	0.809311	0.807277	0.583049	0.584129	0.592722	0.518336	0.454836	0.563852	0.551264	0.507896	0.401103	0.543051	0.415422	0.342221	0.0215652	0.0268541	-0.0285727	0.00657585	-0.000815892
874.026	1.00284	0.916426	0.974742	0.982019	0.816887	0.806604	0.57349	0.558626	0.607288	0.557779	0.451967	0.574639	0.532849	0.494279	0.413761	0.56458	0.395127	0.356106	0.0185145	0.0255387	-0.0337382	0.00595371	0.00770661
878.017	1.01602	0.896847	0.936542	0.854318	0.797674	0.814118	0.601563	0.578858	0.606403	0.564242	0.471664	0.585825	0.559471	0.503334	0.398095	0.534173	0.432088	0.370267	0.0240395	0.0253318	-0.0284139	0.0119768	0.00263091
882.008	0.995643	0.902897	0.911336	0.920781	0.818488	0.776226	0.582005	0.56709	0.592559	0.552082	0.463204	0.566244	0.555626	0.487053	0.410716	0.522749	0.42253	0.371773	0.0309203	0.0233238	-0.0299834	0.0173077	-0.000729006
885.999	1.02671	0.922418	0.973086	0.908216	0.810747	0.787274	0.580131	0.563279	0.595314	0.556841	0.450368	0.556532	0.578604	0.485861	0.410077	0.520538	0.407968	0.351201	0.0259393	0.0258427	-0.0296347	0.00459207	0.00348969
889.99	1.01023	0.885587	0.963699	0.877505	0.812848	0.751007	0.588495	0.549246	0.606739	0.572042	0.469556	0.572816	0.537817	0.497503	0.402303	0.502515	0.426449	0.35682	0.0291623	0.0340213	-0.0278019	-0.00322473	0.00205513
893.981	1.00111	0.916525	0.962193	0.892593	0.834035	0.815709	0.600348	0.575516	0.611539	0.559833	0.444946	0.568683	0.53794	0.509177	0.407046	0.529584	0.413936	0.350982	0.034775	0.0262975	-0.0229077	0.0122516	0.00266248
