# Supplementary material for: Dynamic early clusters of nodal proteins contribute to node of Ranvier assembly during myelination of peripheral neurons
Source: eLife. 2021 Jul 9;10:e68089. doi: 10.7554/eLife.68089 (PMC8289411; doi:10.7554/eLife.68089)
Supplement: Figure 3—figure supplement 2—source data 1. [file elife-68089-fig3-figsupp2-data1.xlsx]

## Sheet: Sheet1
	Figure 3S2B-source data			Figure 3S2C-source data
	Motile vesicles / 100 µm			Speed of motile vesicles (µm/s)
	Before FRAP/ FLIP	After FRAP / FLIP		Before FRAP/ FLIP	After FRAP / FLIP
	33.0103	21.2495		0.924258	1.48625
	34.7504	40.5421		1.0636	1.23826
	31.339	28.49		1.53786	1.48625
	18.0505	31.9889		1.69777	1.21922
	22.1921	33.2881		1.2615	1.50648
