# Supplementary material for: Dynamic early clusters of nodal proteins contribute to node of Ranvier assembly during myelination of peripheral neurons
Source: eLife. 2021 Jul 9;10:e68089. doi: 10.7554/eLife.68089 (PMC8289411; doi:10.7554/eLife.68089)
Supplement: Figure 3—figure supplement 3—source data 1. [file elife-68089-fig3-figsupp3-data1.xlsx]

## Sheet: Sheet1
	Figure 3S3B-source data					Figure 3S3D-source data												Figure 3S3F-source data										Figure 3S3G-source data
	FRAP / Control ROI Intensity					Motile vesicles / 100 µm (Normalised)												Normalised FRAP/ Control ROI fluorescence intensity										Normalised fluorescence intensity
	Pre-bleach	0 h	4 h			DMSO					Nocodazole							Nocodazole				DMSO						Nocodazole				DMSO
	3.33	0.1582	2.198		Before treatment	100	100	100	100	100	100	100	100	100	100		Pre-bleach	1	1	1	1	1	1	1	1		Pre-bleach	1	1	1	1	1	1	1	1
	3.868	0.2212	2.411		1 h	112.115	171.483	95.5319	53.0117	140.462	40.9849	86.4587	22.8083	64.1048	16.954		Post-bleach (0h)	0.1367	0.06211	0.09311	0.03741	0.1206	0.1067	0.09057	0.02794		Post-bleach (0h)	0.92	0.9782	0.886367	0.9341	0.9682	0.957	0.9343	0.9398
	4.168	0.2092	2.366		4.5 h	165.603	199.925	41.6899	78.5503	62.1354	10.8485	53.8172	29.131	28.3433	0		Post-bleach (4h)	0.7464	0.6207	0.5286	0.6158	0.7664	0.8062	0.6343	0.5927		Post-bleach (4h)	0.7639	0.7633	0.893623	0.7323	0.9692	0.804	0.8118	0.8069
