# Supplementary material for: Dynamic early clusters of nodal proteins contribute to node of Ranvier assembly during myelination of peripheral neurons
Source: eLife. 2021 Jul 9;10:e68089. doi: 10.7554/eLife.68089 (PMC8289411; doi:10.7554/eLife.68089)
Supplement: Figure 3—source data 1. [file elife-68089-fig3-data1.xlsx]

## Sheet: Sheet1
	Figure 3B-source data															Figure 3C-source data						Figure 3E-source data								Figure 3F-source data										Figure 3G-source data
	Normalised intensity															Recovery (%)						Normalised intensity								Normalised intensity										Recovery (%)
Time (s)	No Schwann cells			Early clusters				Heminodes				Nodes				No Schwann cells	Early clusters	Heminodes	Nodes		Time (s)	FRAP			FRAP/FLIP both sides				Time (s)	FRAP			FRAP/FLIP both sides			FRAP/FLIP unmyelinated side				Early clusters		Heminodes
0	0	0	0	0	0	0	0	0	0	0	0	0	0	0		0.869829	0.554375	0.301142	0.046554		0	0	0	0	0	0	0		0	0	0	0	0	0	0	0	0	0		FRAP	FRAP/FLIP both sides	FRAP	FRAP/FLIP both sides	FRAP/FLIP unmyelinated side
3.988	0.180778	0.152648	0.15228	0.0308177	0.0281313	0.0586622	0.0885137	0.0161255	0.0137144	0.00791113	0.0238349	0.00171049	0.005562	0.0070069		0.790214	0.483051	0.348907	0.071198		3.988	0.0470311	0.0516468	0.0337288	0.00929458	0.0107172	0.0106517		3.988	0.0210165	0.0114458	0.0185283	0.0107039	0.00912801	0.00977845	0.0147999	0.0136492	0.00936681		0.471642	0.0126677	0.264531	0.0451086	0.0499437
7.977	0.290793	0.256327	0.260145	0.0583348	0.0538658	0.0907329	0.132407	0.0262051	0.0269636	0.0174044	0.0445216	0.00688846	0.00944463	0.0106139		0.871676	0.58968	0.224843	0.046757		7.977	0.087632	0.0865803	0.0570111	0.0129714	0.0161061	0.0165552		7.977	0.0353597	0.0194223	0.0324245	0.0122299	0.0122872	0.0153515	0.0219745	0.0163373	0.0161631		0.640132	0.0760192	0.236555	0.0276053	0.0594113
11.965	0.349716	0.317765	0.328255	0.0814229	0.0643174	0.116816	0.166739	0.035749	0.0381359	0.023225	0.0585871	0.00805825	0.0143948	0.0125783			0.675333	0.374933			11.965	0.111365	0.115522	0.0739311	0.0147405	0.0194218	0.0203047		11.965	0.044447	0.0263491	0.0399049	0.0151238	0.0129684	0.0128012	0.025732	0.0180438	0.0209186		0.449614	0.0584093	0.297649	0.0577328	0.0857101
15.954	0.388451	0.353504	0.386058	0.0924018	0.0764711	0.13573	0.188092	0.0435665	0.0465927	0.0280521	0.0705761	0.00734489	0.0165624	0.0142448							15.954	0.121643	0.135975	0.0861644	0.0145954	0.0199709	0.0239905		15.954	0.0523553	0.0320554	0.0468948	0.0162498	0.0142938	0.0137816	0.0294527	0.0222673	0.0231602
19.942	0.42558	0.384863	0.413474	0.104485	0.0925911	0.15578	0.212279	0.052688	0.0527983	0.0313106	0.0814871	0.00812418	0.0168169	0.0156088							19.942	0.137028	0.157546	0.0980029	0.0172774	0.0239516	0.0241329		19.942	0.0587153	0.0355267	0.0558231	0.018777	0.0150882	0.0170101	0.030981	0.0248577	0.0250629
23.931	0.450184	0.407834	0.424443	0.117664	0.0979987	0.170451	0.225961	0.0564106	0.0622086	0.0342402	0.0872664	0.00782544	0.0178065	0.0180165							23.931	0.147023	0.167653	0.105039	0.0183351	0.0267272	0.0265452		23.931	0.0648988	0.0397706	0.0637922	0.0189442	0.0153541	0.0170694	0.0330468	0.0246768	0.0292659
27.919	0.488436	0.433646	0.462805	0.127808	0.111863	0.179812	0.245539	0.0601463	0.0689252	0.0408834	0.0962223	0.0107134	0.0212315	0.0190246							27.919	0.155205	0.18737	0.112087	0.0186923	0.0306801	0.0287616		27.919	0.0708194	0.0432008	0.0684659	0.0169054	0.0160613	0.0178702	0.0351652	0.025726	0.0305912
31.908	0.501741	0.44596	0.463861	0.13297	0.117232	0.188852	0.261789	0.065813	0.0693112	0.0427103	0.0999364	0.0128442	0.0201571	0.0194097							31.908	0.160244	0.195795	0.116095	0.0208567	0.031442	0.0291727		31.908	0.0752033	0.0466974	0.0766804	0.0209887	0.0181733	0.0215619	0.0357298	0.0278675	0.0332691
35.896	0.519589	0.466416	0.477356	0.135282	0.128078	0.195105	0.272788	0.0746461	0.0787004	0.0457466	0.107849	0.0150575	0.0203203	0.0196753							35.896	0.176155	0.205029	0.125275	0.0231691	0.0333893	0.0307493		35.896	0.0805508	0.0509927	0.0786708	0.0190327	0.0189382	0.0199938	0.0371487	0.0301816	0.0333867
39.885	0.53414	0.481817	0.50941	0.148483	0.130964	0.205745	0.282206	0.0756909	0.085648	0.0473946	0.115098	0.0116327	0.0217547	0.0205396							39.885	0.182999	0.211453	0.128312	0.0221314	0.0369646	0.0336776		39.885	0.0813465	0.054162	0.0853421	0.0213725	0.0197664	0.023631	0.0400297	0.0328862	0.0368306
43.873	0.545608	0.496441	0.517063	0.151162	0.138092	0.214666	0.290809	0.0815244	0.0890395	0.0536354	0.124147	0.0156263	0.0220366	0.0214705							43.873	0.192292	0.213045	0.138425	0.0238987	0.0393298	0.0339227		43.873	0.0856869	0.0585953	0.0902289	0.0214611	0.0216312	0.0257076	0.0400804	0.0337165	0.0377422
47.862	0.559442	0.507226	0.543813	0.161931	0.143796	0.217668	0.299661	0.0875181	0.0931646	0.0537111	0.128894	0.015754	0.0229461	0.0239366							47.862	0.200786	0.21918	0.142014	0.0242344	0.0419397	0.0374888		47.862	0.0913463	0.0593655	0.0962921	0.0225373	0.0248379	0.0272975	0.0406529	0.0328801	0.0378257
51.85	0.573636	0.513865	0.564279	0.163612	0.150483	0.226364	0.309604	0.0849866	0.0958331	0.0557222	0.129448	0.0181125	0.0238026	0.0232346							51.85	0.206777	0.224631	0.145173	0.024715	0.0423035	0.0363241		51.85	0.095563	0.0629825	0.0984245	0.023969	0.0234964	0.0282199	0.0428711	0.035768	0.0368969
55.839	0.581483	0.527165	0.566522	0.173103	0.151311	0.228658	0.315398	0.0856382	0.0976506	0.060219	0.138055	0.0166076	0.0238918	0.0226516							55.839	0.211405	0.236428	0.148646	0.0269438	0.0456607	0.0416337		55.839	0.0993349	0.0664622	0.102317	0.0250048	0.0211006	0.0298828	0.0422019	0.0355338	0.0428317
59.827	0.596143	0.528889	0.567756	0.173615	0.153251	0.242382	0.323588	0.0878874	0.103944	0.0652227	0.142086	0.0176179	0.0235798	0.0236963							59.827	0.218686	0.240789	0.156317	0.0277375	0.0478683	0.0431771		59.827	0.101826	0.0679026	0.105697	0.0247032	0.0219474	0.0293346	0.0436582	0.0386681	0.0428441
63.816	0.610867	0.543115	0.604244	0.178897	0.161706	0.248863	0.328216	0.0943472	0.104852	0.0649761	0.147609	0.0209074	0.0263044	0.0242229							63.816	0.221246	0.249732	0.162205	0.0278633	0.0521796	0.0462735		63.816	0.103492	0.0705222	0.11052	0.0267105	0.0251038	0.0318844	0.0465087	0.0400494	0.0452159
67.804	0.610784	0.552478	0.591055	0.179936	0.163091	0.256245	0.339609	0.0970977	0.109455	0.0678417	0.151588	0.0206997	0.0254191	0.0252719							67.804	0.228706	0.254354	0.167212	0.0296394	0.0531871	0.0467068		67.804	0.106673	0.0725899	0.112147	0.0274826	0.0238349	0.0334493	0.0476913	0.0372869	0.0461735
71.793	0.631346	0.56177	0.609833	0.189784	0.171677	0.263556	0.353834	0.103188	0.110635	0.0707287	0.15354	0.0225362	0.027151	0.0243663							71.793	0.223041	0.262091	0.172732	0.0293616	0.054622	0.0484889		71.793	0.10785	0.0743667	0.113859	0.0290586	0.0239731	0.0345345	0.0477514	0.0396759	0.0494973
75.781	0.62174	0.562994	0.600241	0.198233	0.169554	0.269508	0.35139	0.104599	0.113465	0.0735742	0.158452	0.0202185	0.0289622	0.0248862							75.781	0.23208	0.269647	0.173014	0.0268707	0.0567664	0.0501362		75.781	0.109695	0.0771218	0.119397	0.0295526	0.0252204	0.0355263	0.0474906	0.0413086	0.0488089
79.77	0.634517	0.556553	0.614982	0.201463	0.169831	0.277602	0.36782	0.113798	0.117959	0.0749924	0.163745	0.022381	0.0312944	0.0261086							79.77	0.235506	0.271745	0.176067	0.0295336	0.0566016	0.0482755		79.77	0.111299	0.0785216	0.121382	0.0305808	0.0245152	0.0402713	0.0473505	0.0429653	0.0512636
83.758	0.641629	0.559652	0.634519	0.205005	0.179299	0.274029	0.379147	0.110841	0.121636	0.0786336	0.171482	0.0176092	0.0298135	0.0261371							83.758	0.245846	0.274397	0.186317	0.0288794	0.0566304	0.0546767		83.758	0.112384	0.0804277	0.124549	0.0315664	0.0270374	0.0395368	0.0496576	0.0417803	0.0546724
87.747	0.647775	0.553144	0.633558	0.20722	0.178809	0.275789	0.384584	0.116159	0.123136	0.0767527	0.170637	0.0214303	0.0316168	0.0251626							87.747	0.252664	0.277034	0.186621	0.0294459	0.0575841	0.0535802		87.747	0.114299	0.0827604	0.128894	0.0322692	0.0245055	0.0380192	0.0503022	0.0454941	0.0555049
91.735	0.652118	0.573409	0.651437	0.215509	0.183052	0.282602	0.386318	0.115931	0.125833	0.0793011	0.175664	0.0196204	0.030673	0.0260806							91.735	0.254278	0.276305	0.189094	0.0311331	0.0623765	0.0561283		91.735	0.11575	0.0863482	0.12793	0.033525	0.0266041	0.037815	0.051519	0.0444213	0.0588003
95.724	0.661539	0.574356	0.645062	0.217131	0.187568	0.286293	0.393043	0.114933	0.130556	0.0837024	0.178055	0.0243799	0.0344589	0.0257659							95.724	0.260146	0.27895	0.188426	0.0311975	0.0609354	0.0558975		95.724	0.118686	0.084885	0.130792	0.03609	0.0271187	0.0381331	0.0526139	0.0469196	0.0601597
99.712	0.660825	0.58601	0.658013	0.221877	0.18535	0.293236	0.401767	0.121674	0.134078	0.0849363	0.179557	0.0212803	0.0340472	0.0272793							99.712	0.2629	0.282959	0.194583	0.0310115	0.0635462	0.0569202		99.712	0.120726	0.0895885	0.137275	0.0342197	0.0286315	0.0398936	0.050718	0.0465835	0.056636
103.701	0.669711	0.608931	0.663973	0.229458	0.196987	0.303386	0.398598	0.125424	0.132929	0.0816634	0.181429	0.0234493	0.0315199	0.0268485							103.701	0.265413	0.288016	0.202591	0.0324537	0.0682603	0.0558763		103.701	0.122239	0.0899504	0.14017	0.0328512	0.029706	0.0390033	0.0531186	0.0485489	0.0594999
107.689	0.671673	0.59959	0.647611	0.236536	0.197872	0.304875	0.400746	0.12506	0.136652	0.0841468	0.188812	0.0216668	0.0334499	0.0286013							107.689	0.261789	0.289439	0.203565	0.0341338	0.0685176	0.0603985		107.689	0.124796	0.0922825	0.141178	0.0323364	0.0276745	0.0417421	0.0552918	0.04744	0.0587626
111.678	0.690378	0.610952	0.647514	0.236002	0.207471	0.304896	0.410387	0.132672	0.140292	0.085699	0.192042	0.0235976	0.0317715	0.0289413							111.678	0.271831	0.296411	0.209153	0.0323473	0.0675118	0.0597972		111.678	0.126934	0.0950941	0.142131	0.033827	0.0278942	0.0409947	0.054996	0.0463761	0.0603044
115.666	0.689028	0.614338	0.675414	0.238308	0.208634	0.308298	0.418268	0.13272	0.1409	0.0907956	0.199193	0.0227256	0.0346522	0.0296214							115.666	0.265641	0.297356	0.209366	0.0314655	0.0711853	0.0602811		115.666	0.12556	0.0979055	0.146107	0.0346499	0.0282537	0.0410903	0.054993	0.0516683	0.059054
119.655	0.679486	0.603973	0.673812	0.241792	0.213057	0.311053	0.418762	0.133331	0.139609	0.0935987	0.202083	0.0242067	0.035927	0.0286701							119.655	0.272672	0.303002	0.213613	0.0327029	0.0711421	0.0635433		119.655	0.128428	0.0978467	0.14786	0.0363404	0.0274361	0.0442262	0.0569014	0.0540345	0.0624486
123.643	0.68939	0.615277	0.66807	0.244571	0.212363	0.309615	0.419585	0.134557	0.146125	0.0924096	0.207855	0.0249985	0.036976	0.0279294							123.643	0.27474	0.30705	0.215938	0.0309261	0.0711149	0.0619364		123.643	0.131745	0.100222	0.151336	0.0379475	0.0298898	0.0439004	0.0550045	0.0541102	0.0609005
127.632	0.704395	0.638133	0.665469	0.248114	0.217602	0.315369	0.426575	0.137493	0.14578	0.0936053	0.212705	0.0235176	0.0368545	0.0273778							127.632	0.278431	0.306235	0.22231	0.0301481	0.0714747	0.0635792		127.632	0.133061	0.0987201	0.152611	0.0398125	0.029238	0.0434124	0.0581101	0.052529	0.0604794
131.62	0.70139	0.63445	0.659438	0.247056	0.216596	0.318714	0.433949	0.136278	0.153359	0.0936566	0.203901	0.0267007	0.0386087	0.0280752							131.62	0.275842	0.319152	0.222198	0.0322214	0.0726167	0.0625595		131.62	0.132751	0.101681	0.151857	0.0382506	0.0288783	0.048263	0.0564437	0.0515147	0.0623641
135.609	0.705399	0.629571	0.679718	0.253489	0.215883	0.326345	0.432026	0.136819	0.151052	0.0975571	0.202093	0.0266423	0.0384232	0.0279855							135.609	0.276992	0.316323	0.227841	0.0316935	0.0738923	0.0643758		135.609	0.136298	0.103528	0.155779	0.0378221	0.0284572	0.0455217	0.0578407	0.0531853	0.0653832
139.597	0.710797	0.615119	0.673436	0.256247	0.224738	0.326569	0.43615	0.141512	0.158851	0.100362	0.209974	0.0259253	0.0382887	0.0281564							139.597	0.285125	0.324153	0.228344	0.0330272	0.0752266	0.0662912		139.597	0.137266	0.105048	0.155656	0.0389516	0.0282679	0.0464619	0.0572287	0.054209	0.0685626
143.586	0.702687	0.619185	0.675756	0.259711	0.219232	0.322079	0.436969	0.143335	0.159424	0.0966114	0.214478	0.0267537	0.0418646	0.0281375							143.586	0.284247	0.327602	0.229672	0.0340419	0.0806515	0.0642564		143.586	0.141632	0.107627	0.156279	0.0411368	0.030049	0.0466737	0.0583563	0.0531935	0.0691692
147.574	0.710938	0.621623	0.672945	0.266025	0.232428	0.327751	0.441022	0.141119	0.161792	0.105655	0.21717	0.0281251	0.0431484	0.0302756							147.574	0.290495	0.331033	0.229209	0.0327586	0.0782905	0.0648918		147.574	0.143038	0.108664	0.159472	0.040778	0.0281751	0.0498037	0.0582562	0.0532371	0.0671349
151.563	0.713128	0.628405	0.692689	0.270085	0.234829	0.334864	0.444808	0.145331	0.161609	0.104119	0.215852	0.0289271	0.0399471	0.0297772							151.563	0.292512	0.331783	0.232483	0.0332118	0.0791536	0.0657115		151.563	0.145403	0.110181	0.161637	0.037908	0.0294089	0.0491545	0.0602841	0.0541734	0.0688507
155.551	0.720407	0.634456	0.699955	0.277486	0.239633	0.333307	0.448169	0.144222	0.165689	0.106325	0.215747	0.0294191	0.0403181	0.0295156							155.551	0.29682	0.337318	0.237509	0.0316434	0.082774	0.0648836		155.551	0.148425	0.111808	0.161178	0.0412251	0.0292806	0.0511454	0.0626127	0.0547565	0.0704594
159.54	0.718968	0.640561	0.70459	0.27883	0.240989	0.33718	0.449587	0.148185	0.165905	0.107511	0.219331	0.025668	0.0401113	0.0296581							159.54	0.2964	0.341955	0.240718	0.0320589	0.083351	0.0695184		159.54	0.149417	0.112449	0.163268	0.0396836	0.031821	0.0524171	0.0606129	0.0526976	0.0711179
163.528	0.718556	0.643938	0.709767	0.27628	0.248464	0.343138	0.450388	0.15179	0.164481	0.106822	0.2248	0.0324175	0.0408089	0.0295532							163.528	0.298393	0.342016	0.241476	0.0331394	0.0819955	0.0637952		163.528	0.153103	0.114658	0.165237	0.0409117	0.0298774	0.0515467	0.0611448	0.051174	0.0699365
167.516	0.71967	0.637597	0.713075	0.277488	0.244372	0.343384	0.453648	0.15226	0.166388	0.106216	0.230569	0.0327985	0.0411011	0.0310073							167.516	0.299951	0.346242	0.243024	0.0315426	0.0781479	0.0679207		167.516	0.152851	0.112507	0.167233	0.0413607	0.0311432	0.0527963	0.0628072	0.0555546	0.0735556
171.505	0.725338	0.645969	0.729282	0.28111	0.246515	0.350712	0.456656	0.153163	0.171141	0.10711	0.227757	0.0310768	0.0399385	0.0297055							171.505	0.299875	0.353507	0.247553	0.0308585	0.0820269	0.0683855		171.505	0.153546	0.114228	0.167047	0.0402247	0.0314956	0.0512903	0.0621884	0.0541929	0.0680841
175.493	0.735338	0.648286	0.723247	0.283917	0.253008	0.356802	0.470989	0.152784	0.170883	0.110723	0.233682	0.0316943	0.0427077	0.030187							175.493	0.295137	0.355607	0.249167	0.0342109	0.0795535	0.0674445		175.493	0.152411	0.11509	0.168686	0.0445185	0.0359199	0.0508821	0.0630513	0.0550932	0.0707843
179.482	0.733348	0.659454	0.721303	0.279174	0.252463	0.363163	0.465838	0.152435	0.16912	0.10837	0.229992	0.0343104	0.041474	0.0309901							179.482	0.298769	0.361074	0.249405	0.0349672	0.0817779	0.0689665		179.482	0.154212	0.116412	0.168876	0.0441482	0.0354021	0.0527679	0.0653751	0.0569548	0.0716419
183.47	0.733916	0.648228	0.715829	0.28271	0.247037	0.365215	0.467604	0.160021	0.17796	0.10786	0.232739	0.0334251	0.040271	0.031492							183.47	0.300113	0.355603	0.24651	0.0325813	0.0787214	0.0686588		183.47	0.153902	0.115088	0.172352	0.0432881	0.0351434	0.0525336	0.0616573	0.0563673	0.073372
187.459	0.735392	0.64688	0.707922	0.282871	0.256859	0.364903	0.461415	0.160075	0.172602	0.111249	0.231762	0.0309071	0.0415722	0.0328344							187.459	0.29921	0.360514	0.249792	0.0315342	0.0793074	0.0730098		187.459	0.154285	0.117832	0.173577	0.0426905	0.0363725	0.0519852	0.0633834	0.0557283	0.0745621
191.447	0.738457	0.660394	0.716271	0.281236	0.259668	0.365351	0.471882	0.158818	0.180836	0.111475	0.236167	0.0290126	0.0401589	0.0328215							191.447	0.308212	0.360691	0.251583	0.032429	0.0795474	0.0708883		191.447	0.155397	0.119419	0.174608	0.0436221	0.0342058	0.0535824	0.0634715	0.0557876	0.0780599
195.436	0.731193	0.652207	0.718893	0.290137	0.26416	0.375222	0.475477	0.163275	0.18311	0.110127	0.240853	0.0298558	0.0404312	0.0312362							195.436	0.309218	0.361215	0.258139	0.0322869	0.0797329	0.0693292		195.436	0.158338	0.120143	0.176414	0.0464691	0.0363144	0.0533405	0.0623449	0.0570766	0.075371
199.424	0.742552	0.651803	0.714271	0.293867	0.263918	0.369316	0.479044	0.162206	0.184677	0.11027	0.240881	0.0333303	0.0417956	0.0308052							199.424	0.310982	0.371686	0.256904	0.0307265	0.0803696	0.0703999		199.424	0.159989	0.121728	0.175338	0.0454281	0.0343127	0.0533341	0.0673049	0.0596851	0.0753586
203.413	0.748702	0.651133	0.713759	0.294738	0.263695	0.37223	0.477431	0.163819	0.186957	0.112744	0.239867	0.032588	0.0423072	0.0333368							203.413	0.306206	0.370608	0.258461	0.0301701	0.0825055	0.07209		203.413	0.159861	0.125145	0.176391	0.0430814	0.0330236	0.0539561	0.0667144	0.058877	0.0777946
207.401	0.747759	0.653265	0.709962	0.292416	0.272196	0.38344	0.484557	0.166074	0.187705	0.116011	0.24123	0.032346	0.0424556	0.0321408							207.401	0.308409	0.364757	0.259367	0.0282175	0.0843091	0.0747094		207.401	0.161196	0.12561	0.178616	0.0434261	0.0364883	0.0556656	0.0682612	0.0613022	0.0766827
211.39	0.742044	0.661728	0.71616	0.293878	0.275992	0.394245	0.485893	0.163426	0.187652	0.116157	0.239257	0.0320356	0.0437135	0.0330365							211.39	0.318011	0.366613	0.263594	0.0286408	0.0838822	0.0731694		211.39	0.161727	0.12389	0.182604	0.0460836	0.0359437	0.0550764	0.0675501	0.0597424	0.0804335
215.378	0.741338	0.65249	0.721511	0.298407	0.276803	0.387364	0.48967	0.165749	0.185928	0.11745	0.239918	0.0330444	0.0465548	0.0324135							215.378	0.317585	0.366894	0.259361	0.0310279	0.0845924	0.0750621		215.378	0.16227	0.124464	0.183701	0.0455402	0.0363784	0.0563019	0.0674024	0.0604094	0.0816578
219.367	0.752314	0.668674	0.734921	0.299648	0.278242	0.396125	0.4895	0.166963	0.190152	0.117674	0.244426	0.0315683	0.0460601	0.0320035							219.367	0.316623	0.377358	0.265261	0.0297921	0.0834052	0.0724561		219.367	0.167017	0.127179	0.184797	0.0441472	0.0359187	0.0559412	0.0648552	0.0619702	0.0822174
223.355	0.746505	0.649025	0.73298	0.295461	0.283417	0.387654	0.488385	0.168172	0.191928	0.121804	0.247477	0.0313133	0.0460658	0.0341348							223.355	0.327975	0.37719	0.267175	0.0315353	0.0794036	0.0735852		223.355	0.166322	0.130264	0.187545	0.0445711	0.0365917	0.0572074	0.0662147	0.0601201	0.0842462
227.344	0.759594	0.656426	0.728955	0.300526	0.277196	0.404432	0.494996	0.169155	0.193948	0.120707	0.247082	0.034436	0.0476201	0.0334687							227.344	0.323573	0.378409	0.269244	0.0301733	0.0830903	0.0712913		227.344	0.166094	0.130029	0.188186	0.0453971	0.0373513	0.054795	0.0672623	0.06088	0.0835588
231.332	0.745645	0.650934	0.72882	0.30117	0.278891	0.401644	0.491458	0.169072	0.194687	0.12339	0.251112	0.0339503	0.0489777	0.0319574							231.332	0.321745	0.377392	0.267555	0.0312942	0.0812539	0.0760081		231.332	0.168769	0.129658	0.189893	0.0461613	0.0369952	0.0582375	0.0658096	0.0642079	0.0843592
235.321	0.754318	0.673556	0.724571	0.308472	0.280822	0.405271	0.494462	0.173408	0.198995	0.124858	0.247706	0.030869	0.0475831	0.0336219							235.321	0.317143	0.382769	0.269024	0.0310527	0.0818338	0.0741553		235.321	0.168391	0.13164	0.190147	0.0465114	0.0375569	0.0575872	0.0666832	0.0618406	0.0840341
239.309	0.765176	0.678316	0.752011	0.306412	0.288163	0.411058	0.507974	0.177511	0.202273	0.127726	0.247695	0.0344684	0.0475192	0.0331459							239.309	0.327794	0.378327	0.273377	0.0309004	0.0853102	0.0784524		239.309	0.166777	0.131145	0.190736	0.0441192	0.0373368	0.0585942	0.0649583	0.0629404	0.0835025
243.298	0.750333	0.676116	0.756125	0.307075	0.282607	0.413576	0.50922	0.178521	0.201487	0.122636	0.244527	0.0294729	0.0495104	0.0370491							243.298	0.327091	0.378297	0.278346	0.0285401	0.0823934	0.0739684		243.298	0.168177	0.133699	0.191521	0.0470524	0.0383974	0.0551168	0.0684771	0.0628691	0.0840787
247.286	0.762252	0.67448	0.752058	0.312813	0.284908	0.412065	0.510287	0.177273	0.208267	0.125076	0.249215	0.0286493	0.0462884	0.034791							247.286	0.329171	0.3847	0.277971	0.0303037	0.081013	0.0755517		247.286	0.166935	0.132537	0.191453	0.0442287	0.0374297	0.0581083	0.0681654	0.0614087	0.0855243
251.275	0.757383	0.673057	0.756072	0.318291	0.286609	0.406378	0.511741	0.180917	0.208977	0.124837	0.247256	0.0343625	0.0482561	0.0349228							251.275	0.327274	0.383235	0.279426	0.0317059	0.0842778	0.0731601		251.275	0.170684	0.135077	0.195853	0.0438725	0.0385714	0.058236	0.0664293	0.0648241	0.086111
255.263	0.76062	0.669059	0.756068	0.320553	0.29034	0.409778	0.512782	0.181294	0.207842	0.127585	0.251354	0.0309745	0.0471072	0.0349474							255.263	0.333983	0.389409	0.289687	0.0314876	0.085609	0.0747099		255.263	0.170641	0.135981	0.195836	0.0447871	0.0382752	0.0557982	0.067101	0.0645729	0.0856072
259.252	0.763674	0.675942	0.762591	0.319923	0.285792	0.414965	0.520151	0.183389	0.208579	0.13055	0.25481	0.0304866	0.0485744	0.0357639							259.252	0.325565	0.390685	0.288201	0.0299461	0.0832942	0.0742683		259.252	0.169059	0.135079	0.196422	0.042828	0.0387763	0.0581272	0.0678148	0.0644539	0.0863203
263.24	0.760638	0.680175	0.734304	0.313689	0.284799	0.412958	0.511064	0.180159	0.212867	0.127517	0.254243	0.0329305	0.046972	0.0360592							263.24	0.331779	0.397585	0.289661	0.0314392	0.0810899	0.0746042		263.24	0.17153	0.135041	0.199075	0.0424591	0.038993	0.0583551	0.0670942	0.062696	0.0891282
267.229	0.76622	0.702987	0.732666	0.317651	0.286854	0.424552	0.518693	0.186599	0.211479	0.132366	0.258243	0.0295079	0.0484835	0.0364284							267.229	0.328059	0.407029	0.289994	0.0273194	0.0809641	0.071578		267.229	0.169595	0.135554	0.202059	0.0451028	0.0403754	0.0574945	0.0671079	0.0631175	0.083751
271.217	0.765095	0.702389	0.734337	0.323589	0.289718	0.415818	0.513136	0.186264	0.216295	0.134573	0.252022	0.0304063	0.0505732	0.0348692							271.217	0.33626	0.407874	0.289496	0.0302043	0.0837811	0.0705294		271.217	0.170294	0.138759	0.200737	0.0455721	0.0398348	0.0567867	0.0674375	0.0653277	0.0891183
275.206	0.774387	0.685924	0.735001	0.323827	0.287133	0.414858	0.520207	0.188161	0.211939	0.132841	0.258435	0.0326624	0.048041	0.0343294							275.206	0.333874	0.407746	0.294612	0.0292432	0.0861983	0.0725704		275.206	0.173318	0.137424	0.200416	0.0457504	0.0383759	0.0571481	0.0684983	0.0641689	0.0878239
279.194	0.783527	0.697528	0.746905	0.327048	0.293428	0.430587	0.52413	0.190381	0.216339	0.137803	0.257641	0.0327086	0.0482819	0.0350921							279.194	0.337405	0.406539	0.300121	0.0268484	0.0852285	0.0738343		279.194	0.176387	0.140521	0.198072	0.0456514	0.0365733	0.0570645	0.0701733	0.0618012	0.0842852
283.183	0.795228	0.69362	0.750476	0.326093	0.295665	0.426628	0.525933	0.191197	0.214772	0.136726	0.260229	0.0301108	0.0487585	0.0350886							283.183	0.334538	0.412192	0.297938	0.0281623	0.0854276	0.0728957		283.183	0.174102	0.14154	0.2016	0.0460177	0.0380529	0.0572049	0.0682099	0.0641752	0.08835
287.171	0.784951	0.699445	0.748032	0.334882	0.296891	0.429139	0.524219	0.190441	0.216786	0.138196	0.261776	0.0306466	0.0486383	0.0349032							287.171	0.341603	0.410234	0.298797	0.0278136	0.0866279	0.07154		287.171	0.174298	0.139484	0.207057	0.0458375	0.0386599	0.0585561	0.0672136	0.0651369	0.0847096
291.16	0.795336	0.694169	0.759727	0.332874	0.296183	0.433175	0.534244	0.193037	0.222529	0.139685	0.261777	0.0314356	0.0512772	0.0338041							291.16	0.337282	0.414831	0.295874	0.0282902	0.0849655	0.0742807		291.16	0.178336	0.142211	0.204975	0.0454765	0.0408285	0.0579723	0.067584	0.0645624	0.0890455
295.148	0.780176	0.686115	0.772458	0.339489	0.306972	0.432481	0.525968	0.194426	0.226542	0.139462	0.267665	0.0337792	0.051559	0.0352729							295.148	0.342495	0.413827	0.304536	0.0317716	0.0875051	0.0741241		295.148	0.177626	0.144305	0.208784	0.043681	0.0390149	0.0558149	0.0634517	0.0616693	0.087886
299.137	0.786377	0.70705	0.762343	0.337211	0.305544	0.426194	0.535378	0.192966	0.226103	0.141022	0.271271	0.0360945	0.0473653	0.0356871							299.137	0.341618	0.414337	0.307229	0.0316762	0.0848777	0.0735758		299.137	0.179343	0.146095	0.207854	0.0442571	0.0390917	0.0568732	0.0669633	0.0678889	0.0891936
303.125	0.781255	0.700272	0.76919	0.344143	0.303512	0.441149	0.533903	0.192845	0.224627	0.141759	0.270741	0.0324669	0.0497919	0.0344588							303.125	0.34854	0.426008	0.307035	0.0295743	0.0879878	0.0731528		303.125	0.17916	0.147691	0.209479	0.0446512	0.0386363	0.0578796	0.0679504	0.0642557	0.0863178
307.114	0.780086	0.689538	0.76356	0.339836	0.30679	0.429169	0.534779	0.19605	0.228897	0.146504	0.26455	0.032841	0.0494012	0.0366715							307.114	0.357519	0.422586	0.309556	0.0306107	0.0901546	0.072886		307.114	0.178598	0.146588	0.207285	0.0447113	0.0401715	0.0586281	0.0681975	0.0626576	0.0879436
311.102	0.77834	0.688554	0.784372	0.339668	0.31287	0.425714	0.536607	0.198152	0.225723	0.147925	0.271135	0.0335627	0.047894	0.0351662							311.102	0.351716	0.42392	0.314338	0.0300358	0.0918244	0.0733561		311.102	0.18277	0.146278	0.211119	0.0452065	0.0394825	0.0615097	0.066139	0.0636408	0.0894614
315.091	0.783406	0.69612	0.758651	0.341995	0.31077	0.426582	0.536572	0.196834	0.230696	0.146648	0.271837	0.033198	0.0513232	0.0335959							315.091	0.353621	0.429334	0.316815	0.0298556	0.0914097	0.0729606		315.091	0.183791	0.149586	0.211486	0.0460013	0.0402332	0.0590751	0.0669445	0.0625062	0.0891627
319.079	0.784693	0.701239	0.775922	0.341659	0.311948	0.433198	0.541755	0.200601	0.233087	0.14856	0.271289	0.0322192	0.051403	0.0354619							319.079	0.34641	0.435714	0.318061	0.0300747	0.0891541	0.0751777		319.079	0.185851	0.149212	0.216895	0.0457004	0.0383059	0.0596178	0.0687726	0.0678473	0.0894134
323.068	0.77338	0.694119	0.763232	0.347251	0.318478	0.433499	0.536528	0.202523	0.23504	0.148214	0.271649	0.0306426	0.0518057	0.0353644							323.068	0.344405	0.439809	0.319641	0.0289896	0.0913436	0.0754901		323.068	0.186832	0.151367	0.215925	0.0459407	0.0392113	0.0569252	0.0684959	0.0630578	0.0912135
327.056	0.777791	0.712579	0.752857	0.350594	0.322765	0.432549	0.540365	0.202865	0.229967	0.148168	0.273671	0.0329668	0.0525076	0.0362789							327.056	0.346875	0.436484	0.327404	0.0293988	0.0914202	0.0746693		327.056	0.187896	0.152933	0.215065	0.0455532	0.0401762	0.0557982	0.0653187	0.0620565	0.091886
331.045	0.790551	0.705035	0.758341	0.351701	0.316429	0.436742	0.541852	0.205458	0.229821	0.149418	0.273297	0.0351413	0.0526865	0.0354325							331.045	0.340303	0.438429	0.331712	0.0280429	0.0859105	0.076433		331.045	0.188418	0.152088	0.214578	0.0464903	0.0394404	0.0580444	0.0657878	0.0635605	0.0890074
335.033	0.788541	0.699201	0.761158	0.350549	0.322314	0.44032	0.544284	0.208292	0.233871	0.152123	0.268293	0.0345524	0.0510758	0.0352089							335.033	0.347791	0.445235	0.326591	0.0284037	0.0865324	0.0754246		335.033	0.190018	0.151397	0.212162	0.0468736	0.0400635	0.0598764	0.0654449	0.0621321	0.0886077
339.022	0.796061	0.700506	0.780258	0.343923	0.323345	0.438244	0.548268	0.209593	0.234666	0.151073	0.271779	0.0320356	0.0498382	0.0360561							339.022	0.354801	0.440385	0.330223	0.0279408	0.0885256	0.0782265		339.022	0.187599	0.151922	0.215049	0.0481482	0.0407897	0.0598915	0.066912	0.0626245	0.0898294
343.01	0.792627	0.713272	0.760761	0.346967	0.324106	0.43629	0.556029	0.212907	0.229708	0.154081	0.274525	0.0337713	0.0469512	0.0365292							343.01	0.354924	0.449078	0.333586	0.0256757	0.088261	0.0781878		343.01	0.18648	0.154329	0.215189	0.0451834	0.0401525	0.0586623	0.0685261	0.0625471	0.086988
346.999	0.787884	0.724494	0.783949	0.347655	0.326515	0.438121	0.557617	0.218058	0.229139	0.157394	0.277973	0.034075	0.0482764	0.0351896							346.999	0.350564	0.447247	0.333273	0.0263736	0.0867615	0.0746184		346.999	0.188803	0.157493	0.214221	0.0440149	0.0390361	0.058106	0.0662915	0.063169	0.0858834
350.987	0.8032	0.723385	0.789881	0.354658	0.330332	0.433756	0.557238	0.21111	0.236855	0.156968	0.278989	0.033826	0.0499711	0.0361819							350.987	0.348362	0.450832	0.335669	0.0277111	0.0872106	0.0742214		350.987	0.190821	0.158118	0.218888	0.0433631	0.039501	0.0579083	0.0667505	0.0639862	0.0875651
354.976	0.795804	0.719426	0.800397	0.356015	0.326065	0.445047	0.561235	0.212473	0.234691	0.156707	0.283835	0.0361414	0.0494636	0.0360622							354.976	0.358033	0.45892	0.338342	0.0283524	0.0891631	0.0729667		354.976	0.191019	0.158125	0.220201	0.0450917	0.0406697	0.0601468	0.0669427	0.0610516	0.0911942
358.964	0.797017	0.717401	0.792154	0.371153	0.328643	0.447154	0.564451	0.216618	0.229133	0.156882	0.281706	0.0355386	0.0513388	0.0353775							358.964	0.352125	0.458279	0.335111	0.0272025	0.0881431	0.0756234		358.964	0.189472	0.158673	0.225055	0.0458451	0.0395607	0.0584928	0.0651835	0.061828	0.0901956
362.953	0.802212	0.716923	0.789187	0.360221	0.327597	0.442938	0.562614	0.218519	0.233272	0.158624	0.280539	0.0374768	0.0492515	0.0349462							362.953	0.354842	0.461679	0.338016	0.0271624	0.0853638	0.0778907		362.953	0.191936	0.159966	0.225238	0.045691	0.039365	0.0570067	0.0651072	0.0619656	0.0874344
366.941	0.793303	0.718559	0.797714	0.364687	0.327083	0.446078	0.560634	0.216224	0.235862	0.158478	0.290615	0.0328668	0.048347	0.034715							366.941	0.35808	0.457623	0.342629	0.0253533	0.0870173	0.0763082		366.941	0.191512	0.160175	0.225375	0.0469827	0.0392202	0.0566959	0.0648172	0.0650314	0.0923301
370.93	0.791168	0.713485	0.814959	0.369371	0.333288	0.447182	0.578853	0.2191	0.235892	0.159115	0.289543	0.0371535	0.0482315	0.0357679							370.93	0.357112	0.455312	0.332944	0.026566	0.0859781	0.0774339		370.93	0.196723	0.160164	0.223772	0.0471577	0.0401049	0.0573727	0.0652323	0.0653793	0.0936075
374.918	0.786787	0.728274	0.787778	0.373987	0.327051	0.447328	0.580638	0.219831	0.238074	0.158075	0.288373	0.035737	0.0511272	0.0356712							374.918	0.360284	0.449955	0.336168	0.0259173	0.0846276	0.077072		374.918	0.198027	0.161401	0.226319	0.0457115	0.0416897	0.0590244	0.0654855	0.0663504	0.0912167
378.907	0.797729	0.723785	0.80017	0.370302	0.337151	0.44794	0.577889	0.227452	0.23914	0.16248	0.289619	0.035666	0.051704	0.0368088							378.907	0.356193	0.464461	0.341735	0.0256322	0.0895392	0.076489		378.907	0.195406	0.162234	0.225521	0.0453526	0.0425965	0.0609903	0.0645816	0.06325	0.0896846
382.895	0.803698	0.722552	0.803157	0.375406	0.333504	0.452502	0.585021	0.22604	0.240616	0.161582	0.294907	0.0355582	0.0512081	0.0365885							382.895	0.363571	0.456586	0.346177	0.0243787	0.0913213	0.0748563		382.895	0.198309	0.163087	0.226986	0.0456082	0.041597	0.0615532	0.0653678	0.0625265	0.0916876
386.884	0.801062	0.737932	0.800854	0.376971	0.332132	0.456557	0.58755	0.224876	0.248538	0.164661	0.296246	0.0332438	0.0536594	0.036433							386.884	0.362497	0.468183	0.347996	0.0270243	0.0867202	0.0752355		386.884	0.198011	0.164269	0.227881	0.0482661	0.0382994	0.0657027	0.0644953	0.0664568	0.0913786
390.872	0.807972	0.743745	0.811135	0.378291	0.332374	0.458876	0.580175	0.225445	0.239806	0.161013	0.293314	0.0343701	0.0535607	0.0360026							390.872	0.363017	0.460977	0.345993	0.0225305	0.0878637	0.0761506		390.872	0.200347	0.165462	0.227899	0.0437529	0.0379703	0.0618362	0.0644569	0.066215	0.091143
394.861	0.804659	0.72462	0.81585	0.378153	0.339204	0.457156	0.588654	0.223654	0.242312	0.16423	0.295274	0.0348448	0.0507936	0.0358176							394.861	0.373879	0.454464	0.347793	0.0243008	0.0851787	0.0777685		394.861	0.201799	0.165518	0.22973	0.045249	0.0368832	0.0619167	0.064604	0.065026	0.0946971
398.849	0.810521	0.727271	0.813451	0.370538	0.337326	0.454521	0.59934	0.229069	0.24819	0.167088	0.302769	0.0337873	0.0538668	0.0369855							398.849	0.364514	0.458551	0.346094	0.0270263	0.0846916	0.0795077		398.849	0.20089	0.167258	0.230353	0.0478536	0.0358428	0.0658512	0.0643602	0.0659128	0.0913921
402.838	0.801364	0.732153	0.821218	0.373844	0.343377	0.462222	0.587318	0.230443	0.243718	0.165756	0.300455	0.032818	0.0535675	0.0351992							402.838	0.365005	0.454019	0.344897	0.0270811	0.0895466	0.0782987		402.838	0.203885	0.169193	0.231634	0.0455962	0.0394976	0.0616189	0.0634148	0.0671232	0.0927035
406.826	0.807702	0.724352	0.81773	0.373414	0.341618	0.458413	0.594571	0.229612	0.249254	0.165051	0.301442	0.0349831	0.0536639	0.0366454							406.826	0.366348	0.464868	0.345012	0.0258022	0.0854067	0.0748209		406.826	0.199749	0.166865	0.229652	0.0461275	0.0389953	0.0642407	0.0611455	0.0661018	0.0916995
410.815	0.809246	0.728584	0.838066	0.374316	0.341927	0.470401	0.586694	0.228441	0.245697	0.163042	0.302528	0.0363693	0.0542304	0.036678							410.815	0.366186	0.463436	0.345788	0.0255677	0.0820891	0.0768463		410.815	0.202701	0.170749	0.231398	0.0477608	0.0384246	0.0620852	0.0631762	0.0674538	0.0932918
414.803	0.805969	0.732849	0.814893	0.37996	0.35059	0.465691	0.585651	0.226629	0.249498	0.165018	0.306571	0.0369332	0.055393	0.0370471							414.803	0.36313	0.459752	0.346397	0.0283615	0.0816203	0.0753179		414.803	0.204233	0.171891	0.233403	0.0471228	0.0361454	0.0614103	0.0643896	0.067862	0.0883055
418.791	0.806917	0.72621	0.828116	0.378079	0.353311	0.460455	0.587509	0.229977	0.250329	0.167425	0.306785	0.0360681	0.055133	0.0355386							418.791	0.365303	0.464824	0.345984	0.0278223	0.0852405	0.0775907		418.791	0.202053	0.171893	0.237307	0.0481045	0.0367007	0.0660669	0.0644438	0.0693868	0.0901192
422.78	0.808907	0.735887	0.818061	0.378582	0.356138	0.466778	0.591521	0.231613	0.247234	0.170412	0.30798	0.0379617	0.0549884	0.0384766							422.78	0.363563	0.460704	0.34694	0.0269447	0.0853825	0.0762174		422.78	0.202127	0.176009	0.239149	0.0462127	0.0364788	0.0636761	0.0653873	0.0674762	0.0910519
426.768	0.81507	0.736566	0.822347	0.376804	0.353946	0.467657	0.59935	0.237832	0.253485	0.167902	0.310415	0.0352195	0.0565247	0.0370992							426.768	0.359029	0.467621	0.345438	0.0261297	0.0821908	0.0769558		426.768	0.205942	0.174029	0.238408	0.0463433	0.0385097	0.0642037	0.0651297	0.0668717	0.0898534
430.757	0.811702	0.73146	0.825956	0.385314	0.360775	0.471427	0.599315	0.23367	0.251475	0.169759	0.30891	0.036346	0.0555132	0.0372533							430.757	0.362065	0.467296	0.343852	0.0248142	0.0823073	0.0755738		430.757	0.20462	0.172034	0.241112	0.0467006	0.0382619	0.0657612	0.0660236	0.0670131	0.0897693
434.745	0.808166	0.743004	0.824527	0.382687	0.363178	0.46977	0.59014	0.23818	0.250439	0.172378	0.309964	0.035274	0.055297	0.0388696							434.745	0.364996	0.474814	0.349664	0.0252535	0.08438	0.0769779		434.745	0.20888	0.174996	0.239754	0.0477547	0.0367799	0.0647483	0.0636856	0.0682738	0.093139
438.734	0.815211	0.728034	0.823617	0.391339	0.362126	0.474	0.589222	0.237694	0.247196	0.176598	0.313132	0.0344965	0.0572405	0.0386975							438.734	0.365334	0.472684	0.350656	0.0259648	0.0839962	0.0752756		438.734	0.208553	0.17572	0.242187	0.0478534	0.036851	0.0671918	0.0655688	0.067279	0.092845
442.722	0.815669	0.721931	0.812272	0.391942	0.365074	0.478656	0.591839	0.238575	0.252181	0.179096	0.31519	0.0372625	0.0557097	0.0385526							442.722	0.369887	0.479077	0.348867	0.0228464	0.0830395	0.0731823		442.722	0.209317	0.173349	0.242712	0.0521407	0.0360813	0.0657196	0.0631469	0.0694239	0.0889508
446.711	0.822121	0.74172	0.827771	0.395744	0.365849	0.47479	0.593474	0.237878	0.256339	0.176146	0.316846	0.0363031	0.0577546	0.0369094							446.711	0.370834	0.487229	0.352568	0.0267747	0.0814254	0.0765385		446.711	0.208683	0.174208	0.244119	0.0480328	0.0370406	0.0669341	0.0630859	0.0672888	0.0895202
450.699	0.813509	0.755631	0.817764	0.393338	0.363558	0.485644	0.587364	0.243206	0.256501	0.176065	0.316224	0.0385108	0.0581745	0.0392464							450.699	0.371852	0.479595	0.353168	0.0225253	0.0837081	0.075146		450.699	0.207521	0.173825	0.244708	0.049391	0.03902	0.0636117	0.0632468	0.0688492	0.0924236
454.688	0.820652	0.739678	0.796301	0.394773	0.368594	0.483525	0.590822	0.237588	0.256142	0.179229	0.314931	0.0370038	0.0562137	0.0377027							454.688	0.37188	0.490013	0.354065	0.0232276	0.0835337	0.0771628		454.688	0.20784	0.175344	0.246223	0.0483347	0.0363996	0.0657721	0.0640996	0.0709516	0.0922667
458.676	0.80801	0.741028	0.800898	0.396407	0.362771	0.49214	0.587195	0.2363	0.259032	0.17727	0.320877	0.0363748	0.0563248	0.0391932							458.676	0.370824	0.485198	0.35579	0.0241285	0.0795824	0.0749148		458.676	0.211488	0.175592	0.243555	0.0470396	0.0375289	0.0659851	0.0631537	0.0670445	0.0923027
462.665	0.812376	0.737402	0.807017	0.399726	0.369598	0.483771	0.591114	0.239637	0.256168	0.178275	0.326256	0.0389116	0.0591364	0.0396134							462.665	0.376092	0.479316	0.356671	0.0220903	0.0828545	0.0723527		462.665	0.212357	0.178235	0.246547	0.049451	0.0357814	0.0654583	0.0623568	0.0682126	0.0921015
466.653	0.80863	0.746485	0.805138	0.399053	0.377798	0.483325	0.591683	0.235251	0.262194	0.180882	0.329167	0.0390327	0.0597996	0.0397995							466.653	0.374346	0.479926	0.359086	0.022682	0.0797486	0.0733912		466.653	0.211433	0.179302	0.246646	0.0499903	0.0384721	0.0633774	0.0623226	0.0677834	0.0929091
470.642	0.803314	0.744611	0.83384	0.39909	0.375967	0.493973	0.59013	0.2387	0.260686	0.178077	0.32615	0.0387649	0.0597655	0.0399564							470.642	0.374855	0.480886	0.363889	0.0206897	0.0825537	0.0754397		470.642	0.210717	0.176532	0.244944	0.0524147	0.0388011	0.0635544	0.0634013	0.0699239	0.090662
474.63	0.808328	0.742593	0.823163	0.402591	0.382713	0.481567	0.599406	0.240365	0.263728	0.178224	0.323516	0.0380377	0.0598594	0.0422454							474.63	0.378521	0.485651	0.367068	0.0249656	0.0833856	0.0764091		474.63	0.21049	0.17813	0.245109	0.0533585	0.0359768	0.0628926	0.0628754	0.0671991	0.0884299
478.619	0.817222	0.734133	0.840324	0.407859	0.379498	0.485472	0.597366	0.237404	0.261128	0.179183	0.317321	0.0378872	0.0581505	0.0422544							478.619	0.382912	0.487971	0.366684	0.0214327	0.0788544	0.0751281		478.619	0.212654	0.177934	0.245106	0.0508697	0.0375786	0.0648342	0.0588532	0.0679141	0.0910307
482.607	0.802778	0.740161	0.816163	0.404561	0.382667	0.496664	0.600758	0.241193	0.258989	0.181107	0.324627	0.0372658	0.0604523	0.0420597							482.607	0.379376	0.491823	0.367387	0.0226792	0.0836392	0.0760546		482.607	0.214962	0.180061	0.246559	0.0518993	0.0391719	0.0634494	0.0618291	0.0684654	0.089621
486.596	0.815754	0.739008	0.845541	0.406478	0.391085	0.488564	0.605128	0.245026	0.265644	0.182891	0.324953	0.0369306	0.0603586	0.0409344							486.596	0.389995	0.488385	0.371307	0.0230738	0.0808421	0.0752759		486.596	0.216136	0.183195	0.248742	0.0514538	0.0374988	0.0645735	0.0619888	0.0688194	0.0917358
490.584	0.802389	0.736028	0.855718	0.401184	0.388923	0.494916	0.599088	0.243803	0.262815	0.183221	0.329309	0.0390707	0.0585243	0.0420748							490.584	0.390138	0.492267	0.369882	0.0230035	0.0848674	0.0751941		490.584	0.215737	0.183665	0.245576	0.04862	0.0375305	0.0638877	0.0637337	0.0679914	0.090215
494.573	0.801692	0.742538	0.85255	0.406503	0.394364	0.492863	0.602713	0.24105	0.271229	0.184808	0.325024	0.0363842	0.0584675	0.0432724							494.573	0.393404	0.492036	0.377233	0.0201627	0.0830718	0.0751026		494.573	0.213858	0.183149	0.248093	0.0489763	0.0363207	0.0630284	0.060026	0.0687486	0.0913852
498.561	0.807191	0.72918	0.850246	0.416635	0.392154	0.49351	0.604191	0.24012	0.267206	0.187433	0.329268	0.0372739	0.060941	0.042549							498.561	0.393034	0.493708	0.379649	0.0210104	0.0837853	0.0738287		498.561	0.216142	0.185035	0.250684	0.0493712	0.0385331	0.0659378	0.0601879	0.0667275	0.0947608
502.55	0.806977	0.737194	0.836391	0.415944	0.395259	0.49919	0.599859	0.24161	0.268977	0.186827	0.331502	0.0373761	0.0632024	0.0431399							502.55	0.394276	0.488137	0.378531	0.0231717	0.0842639	0.0745565		502.55	0.217357	0.182104	0.250207	0.0471749	0.035597	0.0633285	0.0587306	0.0679682	0.093867
506.538	0.8137	0.736475	0.845037	0.424201	0.391374	0.501575	0.606625	0.240389	0.27371	0.190028	0.329828	0.0404634	0.0658109	0.0421176							506.538	0.393674	0.496529	0.379102	0.02031	0.0847064	0.0729366		506.538	0.219824	0.187462	0.248645	0.0490465	0.0363464	0.0639009	0.0608298	0.0679785	0.090927
510.527	0.817581	0.7493	0.840238	0.421469	0.390228	0.49603	0.603513	0.242451	0.276416	0.188416	0.332076	0.0394291	0.0647863	0.0440789							510.527	0.393557	0.493006	0.375901	0.0214401	0.0827128	0.0773533		510.527	0.221398	0.187239	0.252982	0.0480863	0.0358424	0.0619649	0.0625381	0.0680927	0.0897526
514.515	0.819183	0.728826	0.840572	0.42861	0.40093	0.492495	0.612838	0.244291	0.277861	0.188247	0.330839	0.0379998	0.0623186	0.0422965							514.515	0.399995	0.491871	0.3799	0.019388	0.0838101	0.0754239		514.515	0.223418	0.190075	0.254236	0.0468671	0.0342201	0.0601222	0.0616662	0.0657836	0.0929536
518.504	0.827661	0.73232	0.839855	0.423465	0.405964	0.501874	0.623239	0.243627	0.271728	0.191752	0.323556	0.0390786	0.0650828	0.0435663							518.504	0.399173	0.496236	0.380172	0.0188246	0.0824938	0.0757603		518.504	0.221526	0.192006	0.253116	0.0457389	0.0361493	0.0607608	0.0605755	0.0679735	0.0921824
522.492	0.818638	0.731633	0.840949	0.430721	0.407195	0.501775	0.617947	0.246404	0.276241	0.190104	0.325292	0.0398549	0.0641322	0.0452628							522.492	0.405674	0.504226	0.387691	0.0204922	0.0876476	0.0729185		522.492	0.226542	0.189677	0.253141	0.0494142	0.0365206	0.0614679	0.0614997	0.0678539	0.0915103
526.481	0.818979	0.731448	0.854635	0.433063	0.408672	0.50617	0.626185	0.250422	0.272528	0.192996	0.322789	0.0422592	0.0650578	0.0444129							526.481	0.401976	0.506525	0.380728	0.0175978	0.0862819	0.0767911		526.481	0.225484	0.188845	0.258717	0.0508825	0.0377084	0.0607618	0.0583059	0.0674803	0.091938
530.469	0.817562	0.728544	0.856364	0.435134	0.406628	0.509398	0.635327	0.250189	0.271383	0.192305	0.323938	0.042863	0.066143	0.0436937							530.469	0.401092	0.510057	0.384798	0.0217587	0.0847269	0.0747547		530.469	0.225178	0.191037	0.257747	0.0468454	0.0356929	0.0615878	0.0591825	0.0660024	0.0920761
534.458	0.827889	0.733677	0.849623	0.440921	0.405221	0.512613	0.637248	0.25095	0.272035	0.188887	0.328708	0.0424531	0.064887	0.0434451							534.458	0.405253	0.517939	0.385558	0.0193388	0.0832066	0.074472		534.458	0.225219	0.189933	0.257816	0.0488532	0.0356551	0.0585784	0.0592297	0.0651759	0.0917214
538.446	0.824999	0.738696	0.838414	0.432841	0.408006	0.508637	0.624471	0.25092	0.27606	0.192473	0.326526	0.0413249	0.0626767	0.0439073							538.446	0.399628	0.524265	0.384513	0.0187443	0.0828162	0.0740014		538.446	0.223847	0.194084	0.261255	0.049628	0.0364336	0.0620859	0.0593433	0.0649287	0.0954356
542.435	0.818166	0.742422	0.852467	0.433877	0.410762	0.509823	0.622558	0.24998	0.282916	0.192405	0.329476	0.0403893	0.0638939	0.0466686							542.435	0.406954	0.523713	0.383505	0.0205382	0.0810183	0.0706681		542.435	0.228179	0.189935	0.258817	0.0504319	0.0362015	0.0593841	0.0567882	0.0636889	0.0912044
546.423	0.821425	0.727982	0.859842	0.440258	0.416304	0.512429	0.624649	0.249338	0.283688	0.191093	0.331254	0.043433	0.0677537	0.0455136							546.423	0.400843	0.523942	0.387028	0.0190283	0.0824879	0.0719072		546.423	0.226672	0.193613	0.260356	0.0493195	0.0355199	0.0603238	0.0565881	0.0623543	0.0889297
550.412	0.828168	0.741317	0.852989	0.433765	0.417176	0.517533	0.62697	0.252251	0.286913	0.193277	0.331095	0.0404582	0.0638098	0.0439868							550.412	0.408448	0.529845	0.379534	0.025592	0.0836599	0.0732267		550.412	0.228475	0.193482	0.265589	0.0484183	0.0363617	0.0622576	0.0581088	0.065513	0.0928575
554.4	0.841411	0.749603	0.852835	0.442506	0.411549	0.524379	0.627558	0.252906	0.285878	0.192923	0.33469	0.043414	0.0649564	0.0441937							554.4	0.406649	0.53029	0.378021	0.0240671	0.0800853	0.0745554		554.4	0.231752	0.194179	0.263299	0.044909	0.0350475	0.0637727	0.0568648	0.0637728	0.0900156
558.389	0.826341	0.751306	0.849435	0.442858	0.415973	0.519766	0.63505	0.251262	0.283544	0.194011	0.334854	0.0439098	0.0628687	0.0448879							558.389	0.406515	0.532141	0.375024	0.0243644	0.0823925	0.0719219		558.389	0.231086	0.195369	0.259822	0.046291	0.0357069	0.0642683	0.0571807	0.0638948	0.0916796
562.377	0.824507	0.742322	0.845846	0.440316	0.410991	0.523482	0.632042	0.253755	0.286116	0.197444	0.336184	0.0457917	0.0620214	0.0446653							562.377	0.415306	0.537393	0.378474	0.0203842	0.0827966	0.0700398		562.377	0.231074	0.197144	0.262084	0.0468049	0.0357617	0.0641518	0.0570582	0.0651032	0.0939169
566.366	0.845037	0.75449	0.854586	0.44776	0.411652	0.517738	0.622065	0.25596	0.28493	0.196764	0.335139	0.0428346	0.0671452	0.0442211							566.366	0.417737	0.532107	0.382156	0.0178985	0.082044	0.0716974		566.366	0.232269	0.194741	0.265128	0.0452679	0.0361564	0.0627425	0.0583671	0.0652387	0.0916782
570.354	0.842275	0.754857	0.855397	0.442766	0.412296	0.5219	0.624044	0.255102	0.287474	0.199532	0.334828	0.042816	0.0664267	0.0442387							570.354	0.404125	0.531254	0.381455	0.0200812	0.0829051	0.0693999		570.354	0.234333	0.196427	0.264618	0.0468325	0.0341819	0.0623609	0.0558293	0.0644502	0.0909648
574.343	0.838593	0.754439	0.873047	0.446938	0.412521	0.531276	0.624457	0.25349	0.289583	0.199348	0.338817	0.0431679	0.0647043	0.0449826							574.343	0.401897	0.531276	0.383557	0.019722	0.0832655	0.0737769		574.343	0.234527	0.196374	0.267763	0.0475001	0.0351357	0.0628702	0.0559198	0.0620995	0.0922788
578.331	0.842079	0.756969	0.868399	0.450073	0.419221	0.523666	0.631398	0.252318	0.28396	0.201255	0.340564	0.0437306	0.0672853	0.0433714							578.331	0.413068	0.533371	0.378832	0.0189203	0.0811381	0.0712534		578.331	0.235447	0.19975	0.265898	0.0467841	0.0338991	0.0661761	0.0550006	0.0650722	0.0889797
582.32	0.831653	0.753787	0.856421	0.449207	0.41972	0.520503	0.637262	0.256979	0.287758	0.202415	0.340849	0.0466191	0.0668202	0.0436488							582.32	0.422493	0.536361	0.382484	0.017595	0.0815595	0.0705081		582.32	0.235678	0.198928	0.266593	0.0448937	0.0358841	0.0654308	0.0548064	0.0630503	0.0930237
586.308	0.835877	0.736088	0.845388	0.454628	0.421283	0.52183	0.635039	0.257914	0.285243	0.194675	0.338737	0.0422255	0.0646779	0.0441417							586.308	0.408928	0.538637	0.38453	0.0174848	0.0794859	0.0731481		586.308	0.235982	0.197196	0.262799	0.0482984	0.0363245	0.0648493	0.0564338	0.0648228	0.0938806
590.297	0.830573	0.778686	0.839548	0.454115	0.416554	0.525346	0.634624	0.254693	0.287856	0.199573	0.343847	0.0463254	0.0684992	0.0439459							590.297	0.417684	0.540026	0.388691	0.0160432	0.0793248	0.070354		590.297	0.239255	0.1975	0.264981	0.0483639	0.0341074	0.0627828	0.0542643	0.0645653	0.0917225
594.285	0.830248	0.759136	0.853231	0.450252	0.417187	0.525982	0.641529	0.253328	0.285493	0.197835	0.345229	0.0465884	0.0692431	0.0430293							594.285	0.419521	0.539413	0.389638	0.018107	0.0786213	0.0700315		594.285	0.239248	0.201508	0.268176	0.0465731	0.0341392	0.0632363	0.0544056	0.0665247	0.0911545
598.274	0.834037	0.75852	0.856826	0.448106	0.420685	0.520278	0.637264	0.262674	0.291623	0.202644	0.346216	0.0452498	0.0672931	0.0435168							598.274	0.421305	0.541068	0.393802	0.0173752	0.0825009	0.0698573		598.274	0.240621	0.200886	0.265735	0.0497835	0.033633	0.0602053	0.0522785	0.0653345	0.0878954
602.262	0.847212	0.759055	0.85027	0.443098	0.417564	0.520934	0.62948	0.259603	0.290773	0.200245	0.344961	0.0483039	0.067494	0.0457279							602.262	0.423625	0.544193	0.391069	0.0164561	0.0833216	0.0693921		602.262	0.238103	0.201123	0.265715	0.0496973	0.0338138	0.0606598	0.0558733	0.0672377	0.0918316
606.251	0.839953	0.763315	0.852534	0.440208	0.422482	0.529865	0.638188	0.260543	0.293932	0.200516	0.345766	0.0468296	0.0667628	0.0435579							606.251	0.42569	0.553688	0.395364	0.0176439	0.07959	0.0728729		606.251	0.239901	0.200317	0.268446	0.049058	0.0361809	0.0620759	0.0585321	0.0665886	0.0914416
610.239	0.848559	0.761245	0.842573	0.441041	0.43081	0.528437	0.63413	0.258995	0.291822	0.19909	0.34848	0.0462043	0.0678376	0.0439861							610.239	0.429153	0.551875	0.394243	0.021176	0.0787907	0.0698269		610.239	0.240916	0.201419	0.270662	0.0460569	0.035066	0.0633718	0.0575964	0.0668318	0.093392
614.228	0.847411	0.75665	0.840558	0.439523	0.424722	0.538948	0.638751	0.263746	0.295209	0.199615	0.347506	0.0478499	0.0666666	0.0428355							614.228	0.426653	0.554827	0.39687	0.0205541	0.0813413	0.0680399		614.228	0.241655	0.199899	0.269671	0.0470007	0.0356905	0.0641218	0.0572812	0.0666412	0.0946312
618.216	0.852577	0.760735	0.856393	0.44079	0.430714	0.539198	0.630803	0.264956	0.299737	0.198453	0.352253	0.0452	0.0656108	0.0430879							618.216	0.431502	0.554325	0.397522	0.0192644	0.0800416	0.0690559		618.216	0.241745	0.200046	0.268877	0.0476408	0.0344497	0.0651547	0.0572173	0.0693169	0.0924132
622.205	0.841893	0.767091	0.857725	0.444253	0.433158	0.527569	0.637057	0.260964	0.296484	0.197858	0.354567	0.0455048	0.0685355	0.0445486							622.205	0.434391	0.558127	0.399361	0.0188153	0.077617	0.0700646		622.205	0.243354	0.20136	0.270371	0.0458624	0.0357152	0.0639187	0.0557003	0.0696353	0.0899114
626.193	0.856158	0.75318	0.869518	0.441261	0.418735	0.541006	0.637313	0.264089	0.29463	0.198332	0.353344	0.046935	0.0686326	0.0445664							626.193	0.437335	0.551008	0.403068	0.0164912	0.0834388	0.0700605		626.193	0.242154	0.204156	0.273579	0.0460271	0.0342066	0.0630416	0.0571086	0.0680876	0.0899518
630.182	0.848543	0.761689	0.854662	0.445957	0.42252	0.53389	0.637194	0.267172	0.296913	0.198768	0.355172	0.04377	0.069398	0.0445696							630.182	0.431319	0.559684	0.405658	0.0153961	0.0803641	0.0694061		630.182	0.244113	0.204543	0.271172	0.0474197	0.0354271	0.0625446	0.057419	0.0655411	0.0893451
634.17	0.837728	0.751157	0.858615	0.447999	0.420238	0.540861	0.639799	0.265375	0.298896	0.201032	0.356149	0.0445962	0.0694233	0.0437875							634.17	0.435388	0.558423	0.401228	0.0163502	0.0794041	0.0722228		634.17	0.244199	0.207517	0.269863	0.0473312	0.0330336	0.0618682	0.0574726	0.065451	0.090188
638.159	0.847212	0.78471	0.864051	0.449283	0.42571	0.542977	0.643935	0.268671	0.301711	0.202358	0.355919	0.0433617	0.0699438	0.0444534							638.159	0.436638	0.55727	0.400357	0.0171567	0.0811675	0.0712249		638.159	0.242789	0.206929	0.274652	0.0482704	0.0334358	0.0647445	0.0548785	0.0694096	0.0892928
642.147	0.839333	0.765002	0.856693	0.463924	0.430942	0.541535	0.645644	0.269294	0.299775	0.20623	0.354781	0.0462728	0.0663389	0.0441575							642.147	0.436189	0.565344	0.403875	0.0165618	0.0820343	0.0697012		642.147	0.244071	0.208078	0.273971	0.0485968	0.0338063	0.0649358	0.0561881	0.0680631	0.0900803
646.136	0.843855	0.760494	0.849422	0.456463	0.438079	0.549319	0.647946	0.274169	0.295009	0.204445	0.355753	0.0452957	0.0664134	0.0445917							646.136	0.442676	0.563013	0.407786	0.0154394	0.0784713	0.0694424		646.136	0.248147	0.210463	0.275364	0.0473338	0.0325202	0.0659149	0.060625	0.0633574	0.0847103
650.124	0.83621	0.771026	0.848795	0.464113	0.434817	0.545115	0.649661	0.269383	0.299425	0.201875	0.349578	0.0447344	0.0686619	0.0455219							650.124	0.434305	0.562742	0.403603	0.0164409	0.0775258	0.069362		650.124	0.246059	0.210196	0.279852	0.0480708	0.0337966	0.0660211	0.0603076	0.068065	0.0886151
654.113	0.827792	0.751706	0.850922	0.461106	0.429359	0.550996	0.647949	0.272906	0.307218	0.20725	0.35272	0.0459811	0.0698991	0.0444842							654.113	0.436949	0.566561	0.409494	0.0194111	0.0775732	0.0689899		654.113	0.24586	0.210045	0.275784	0.0467348	0.0340428	0.0660487	0.0608039	0.0699497	0.0836304
658.101	0.83417	0.766636	0.857671	0.474203	0.435454	0.554943	0.654753	0.272822	0.311709	0.207192	0.354832	0.0464327	0.0683635	0.0449507							658.101	0.432917	0.569604	0.412465	0.0180822	0.0775845	0.0685395		658.101	0.24706	0.207834	0.277126	0.0500641	0.0344769	0.0660387	0.0606015	0.0696371	0.0863319
662.089	0.839769	0.772746	0.861212	0.470593	0.435815	0.549128	0.65335	0.271522	0.312908	0.208389	0.3576	0.0486462	0.0667389	0.0438105							662.089	0.423278	0.570933	0.411717	0.0180628	0.0820374	0.0665509		662.089	0.246087	0.207571	0.275869	0.0476869	0.036477	0.0666234	0.0589517	0.0660401	0.0902376
666.078	0.835848	0.765376	0.865407	0.472351	0.441734	0.551507	0.661729	0.275648	0.312765	0.205363	0.357508	0.0447761	0.0707753	0.0445669							666.078	0.423983	0.575316	0.415323	0.0158084	0.0782637	0.0685342		666.078	0.250507	0.211424	0.274995	0.0460697	0.0346733	0.0631717	0.0594303	0.0659413	0.0901825
670.066	0.835915	0.773053	0.853441	0.47163	0.433531	0.546225	0.656542	0.27536	0.309103	0.2048	0.359877	0.045636	0.0684602	0.044227							670.066	0.430491	0.577106	0.410608	0.0171488	0.0793136	0.0716732		670.066	0.250819	0.209212	0.275765	0.0495321	0.035135	0.0625526	0.0586409	0.0651735	0.0875322
674.055	0.83108	0.773537	0.844931	0.469403	0.438054	0.547293	0.653863	0.278292	0.313853	0.20689	0.360635	0.0423528	0.0694317	0.0434542							674.055	0.431988	0.580843	0.415963	0.0147958	0.0808771	0.0708837		674.055	0.251372	0.208077	0.279735	0.0475848	0.0362961	0.0615262	0.0576647	0.0683485	0.0897481
678.043	0.848166	0.762099	0.847971	0.472474	0.437466	0.547294	0.651271	0.279718	0.305678	0.205159	0.359847	0.0406283	0.070231	0.0442393							678.043	0.432667	0.58165	0.415763	0.0171074	0.0788474	0.0685553		678.043	0.251618	0.212787	0.278587	0.0480196	0.0344191	0.0636895	0.0580969	0.0666816	0.0874235
682.032	0.857412	0.760772	0.845205	0.47872	0.441198	0.548705	0.654405	0.280565	0.306609	0.202943	0.364663	0.0435414	0.0708903	0.0457113							682.032	0.433558	0.579831	0.419689	0.0147602	0.0801052	0.06667		682.032	0.249567	0.214304	0.277101	0.0471223	0.0353245	0.064933	0.0585994	0.0634391	0.087614
686.02	0.851701	0.758664	0.840935	0.486122	0.443066	0.551994	0.665136	0.27826	0.311789	0.207346	0.368947	0.044486	0.0688968	0.0466081							686.02	0.435451	0.590418	0.417977	0.0154433	0.0782275	0.0683718		686.02	0.25014	0.212811	0.27618	0.0472878	0.0351023	0.0633178	0.0562884	0.0645099	0.0841695
690.009	0.854016	0.756067	0.845369	0.485955	0.436769	0.544712	0.659049	0.277509	0.314071	0.204291	0.367866	0.0454171	0.0692982	0.0456373							690.009	0.438274	0.587132	0.412762	0.015621	0.0789279	0.0692257		690.009	0.249892	0.213951	0.276302	0.0464118	0.0365481	0.0598648	0.0576168	0.0688607	0.0851439
693.997	0.861547	0.75541	0.837418	0.491649	0.432949	0.549462	0.672128	0.278932	0.315924	0.20637	0.367161	0.0454593	0.071344	0.0450988							693.997	0.432899	0.590556	0.422749	0.0166147	0.0773218	0.0675188		693.997	0.248837	0.214255	0.279146	0.0483434	0.0314673	0.0644471	0.0546113	0.0668943	0.0835913
697.986	0.863845	0.76083	0.871527	0.497079	0.436348	0.544018	0.663547	0.282746	0.311679	0.205845	0.368759	0.0434348	0.0705315	0.0439991							697.986	0.437735	0.597026	0.418378	0.0165076	0.0804395	0.0678424		697.986	0.249621	0.214416	0.28023	0.0478263	0.0349453	0.0666473	0.0542971	0.0680748	0.0847751
701.974	0.864244	0.771163	0.847623	0.496254	0.439668	0.547978	0.668465	0.280475	0.309549	0.209071	0.366197	0.0434701	0.0704451	0.0460502							701.974	0.43591	0.576527	0.423288	0.0144584	0.0823155	0.0677584		701.974	0.251087	0.215376	0.278152	0.0475119	0.0329383	0.0639695	0.0543805	0.0667909	0.0835127
705.963	0.857989	0.776303	0.844232	0.48987	0.441823	0.553857	0.662501	0.277452	0.317118	0.208141	0.370462	0.042738	0.0689762	0.0458974							705.963	0.442843	0.583941	0.418226	0.0147152	0.0809238	0.065827		705.963	0.252922	0.214657	0.274909	0.0461188	0.0325332	0.0676001	0.0568744	0.0675934	0.0828435
709.951	0.853343	0.766688	0.836397	0.486126	0.439671	0.554118	0.666947	0.279681	0.310154	0.205895	0.369766	0.0434847	0.0668878	0.0442007							709.951	0.44529	0.581512	0.421819	0.0141032	0.0815214	0.0654593		709.951	0.250951	0.216666	0.281294	0.0459966	0.0336019	0.0660258	0.0566525	0.0659335	0.0838987
713.94	0.852478	0.77383	0.84821	0.489911	0.437557	0.547825	0.66058	0.277297	0.31627	0.210122	0.373748	0.0435632	0.0679776	0.0446865							713.94	0.447098	0.583279	0.427983	0.0163089	0.0814235	0.0711253		713.94	0.249867	0.217035	0.278029	0.0449176	0.0343288	0.0662337	0.0551291	0.0653542	0.0840204
717.928	0.852032	0.756009	0.838839	0.493721	0.436892	0.541874	0.658856	0.283126	0.320641	0.207211	0.36855	0.0439911	0.0685873	0.0448512							717.928	0.441844	0.591535	0.42896	0.0156151	0.0829968	0.0672298		717.928	0.250333	0.217388	0.280022	0.0428776	0.0335105	0.0666545	0.0550692	0.0657525	0.0808884
721.917	0.848362	0.757436	0.852428	0.494305	0.435191	0.552759	0.66506	0.28213	0.314551	0.2121	0.373093	0.0434026	0.068082	0.0465371							721.917	0.450297	0.590841	0.428621	0.0143843	0.0786483	0.0664055		721.917	0.249238	0.217916	0.278098	0.0447776	0.0312128	0.0646896	0.056134	0.0657073	0.0796429
725.905	0.841671	0.760846	0.829263	0.491135	0.436373	0.552998	0.65928	0.279225	0.321346	0.214829	0.372681	0.0444523	0.0671914	0.0460502							725.905	0.451233	0.590112	0.430687	0.0150546	0.0814563	0.0653731		725.905	0.24889	0.219784	0.278229	0.0450431	0.0308513	0.0658487	0.0562675	0.0648331	0.0833575
729.894	0.8609	0.769079	0.846487	0.497291	0.440508	0.542538	0.662562	0.284623	0.31651	0.210198	0.368322	0.045915	0.0678811	0.0449084							729.894	0.452822	0.597501	0.429014	0.0151528	0.079223	0.0636255		729.894	0.255034	0.220988	0.278285	0.0456386	0.0327274	0.0621042	0.0552516	0.0664915	0.0837014
733.882	0.84317	0.765484	0.833075	0.494858	0.441552	0.547915	0.658886	0.283903	0.313638	0.21354	0.368472	0.0449325	0.0682744	0.0456074							733.882	0.453482	0.600765	0.426222	0.0154945	0.0779242	0.0621401		733.882	0.253588	0.217781	0.279761	0.0460258	0.0310831	0.0616966	0.0545272	0.067653	0.0859206
737.871	0.854669	0.760808	0.852553	0.49251	0.442474	0.544819	0.660893	0.282291	0.320637	0.209988	0.368026	0.0444534	0.0694583	0.0471647							737.871	0.447419	0.593027	0.436174	0.0166412	0.0810869	0.0631571		737.871	0.252412	0.220644	0.284806	0.0466221	0.0307935	0.0623665	0.0550151	0.0664928	0.085589
741.859	0.854285	0.77518	0.85269	0.502954	0.438188	0.553729	0.665899	0.281596	0.313783	0.208136	0.365934	0.0418543	0.0687144	0.0467313							741.859	0.446953	0.595151	0.43031	0.0141533	0.0788407	0.0644592		741.859	0.251505	0.221725	0.281573	0.0443324	0.0296291	0.0617663	0.051801	0.069524	0.0807182
745.848	0.860746	0.776033	0.850369	0.502308	0.453748	0.547769	0.662896	0.286868	0.316433	0.210736	0.371152	0.0439906	0.0689144	0.0455711							745.848	0.441895	0.60439	0.431103	0.0135898	0.0813159	0.0622509		745.848	0.25812	0.222029	0.286702	0.044253	0.0314658	0.06156	0.0506704	0.0675673	0.0826507
749.836	0.863241	0.769194	0.842689	0.503916	0.444661	0.558434	0.673372	0.28451	0.318316	0.210238	0.375909	0.0416713	0.0665589	0.0466002							749.836	0.444175	0.610121	0.431374	0.0165779	0.0789867	0.0634687		749.836	0.254283	0.223564	0.285781	0.0444516	0.031454	0.059936	0.0514564	0.0686788	0.0843082
753.825	0.866322	0.768018	0.838308	0.506371	0.448776	0.569447	0.675336	0.281992	0.319016	0.213125	0.373256	0.0420191	0.0692822	0.0463166							753.825	0.454672	0.601208	0.436619	0.015151	0.0778689	0.0643378		753.825	0.255983	0.220943	0.281548	0.0454949	0.0331394	0.0642749	0.0494105	0.0635306	0.0832748
757.813	0.86669	0.777966	0.836421	0.514658	0.45539	0.570112	0.674357	0.285033	0.326182	0.21376	0.372962	0.0436411	0.0700684	0.0462432							757.813	0.459967	0.601915	0.434196	0.0133687	0.0810159	0.0655092		757.813	0.254147	0.2226	0.287308	0.047688	0.0307724	0.061685	0.0530851	0.067174	0.0831269
761.802	0.86529	0.77778	0.833814	0.510411	0.45542	0.576517	0.668937	0.290436	0.327406	0.213805	0.370504	0.0443141	0.0689767	0.0464916							761.802	0.452835	0.599045	0.434861	0.0162596	0.0820717	0.0642991		761.802	0.257901	0.223648	0.286473	0.0443471	0.0307526	0.0620325	0.0527227	0.0648958	0.0805208
765.79	0.865854	0.775166	0.845866	0.507868	0.45506	0.574977	0.669506	0.289614	0.328358	0.215017	0.374073	0.0444934	0.0704788	0.0476774							765.79	0.457603	0.595636	0.432298	0.0158943	0.0767885	0.0651395		765.79	0.26014	0.222864	0.2862	0.0466804	0.0305698	0.0621845	0.0514841	0.0660283	0.0811702
769.779	0.857961	0.772309	0.844578	0.509855	0.455287	0.572448	0.663439	0.290575	0.319754	0.21705	0.372088	0.0440434	0.0691852	0.0450327							769.779	0.450171	0.602708	0.432699	0.0149477	0.0773822	0.0638913		769.779	0.256466	0.22365	0.289213	0.0450109	0.0302987	0.0608983	0.0521365	0.0658511	0.0849268
773.767	0.853596	0.759983	0.86258	0.513353	0.456775	0.558811	0.669083	0.294318	0.320139	0.215581	0.374246	0.0429881	0.0707103	0.0467811							773.767	0.446447	0.602021	0.431089	0.0156943	0.0768996	0.0621272		773.767	0.258834	0.223102	0.28843	0.0469289	0.0318063	0.0605622	0.0544434	0.0679866	0.0829863
777.756	0.850619	0.768995	0.854268	0.504232	0.453346	0.562992	0.66638	0.293289	0.337638	0.214537	0.372026	0.0429979	0.06922	0.0449746							777.756	0.453527	0.609106	0.441838	0.0132696	0.0793352	0.0620811		777.756	0.261093	0.224509	0.288376	0.0454784	0.0324045	0.0619741	0.0531245	0.063772	0.0801336
781.744	0.854446	0.762927	0.867121	0.507095	0.45734	0.563816	0.667616	0.299889	0.333423	0.218277	0.375338	0.0459477	0.0715734	0.0486758							781.744	0.444406	0.601288	0.438036	0.0137683	0.0789228	0.0632274		781.744	0.260968	0.224092	0.288949	0.0468408	0.0308133	0.0583141	0.0534739	0.0632192	0.0838904
785.733	0.85117	0.766548	0.834371	0.51944	0.460884	0.565802	0.668997	0.293941	0.325395	0.218585	0.371697	0.0452894	0.0714982	0.0471747							785.733	0.452283	0.60025	0.439596	0.0137242	0.0789937	0.059622		785.733	0.25979	0.225915	0.29224	0.0458189	0.0312767	0.0583572	0.0502706	0.0644557	0.0826945
789.721	0.8486	0.778615	0.852113	0.51815	0.46239	0.56836	0.663447	0.295975	0.329752	0.216779	0.376221	0.0448729	0.0705005	0.045973							789.721	0.448641	0.605549	0.441939	0.0129504	0.0789359	0.0613864		789.721	0.25912	0.224612	0.291842	0.0470749	0.0330481	0.0595947	0.0524901	0.0658166	0.0851158
793.71	0.84843	0.773385	0.863678	0.517265	0.459502	0.577502	0.664764	0.294898	0.33624	0.219983	0.378963	0.0454669	0.0713374	0.0465146							793.71	0.451304	0.602901	0.433645	0.0136894	0.0762606	0.0603806		793.71	0.262421	0.226955	0.290906	0.0467881	0.0302614	0.0601304	0.0524411	0.0633362	0.0872556
797.698	0.85734	0.782113	0.869268	0.520072	0.468156	0.573507	0.657557	0.293991	0.334077	0.218275	0.376413	0.0446184	0.0723289	0.0471158							797.698	0.456421	0.60503	0.44292	0.0144475	0.0813011	0.0618791		797.698	0.257878	0.228372	0.291386	0.0453729	0.0293789	0.0627526	0.0516778	0.0638407	0.0885127
801.687	0.854649	0.787331	0.854724	0.528268	0.463106	0.578044	0.654716	0.290293	0.337206	0.216327	0.377587	0.0468259	0.0719508	0.0458598							801.687	0.457831	0.608943	0.43693	0.0161212	0.0787992	0.0595481		801.687	0.260553	0.22751	0.293717	0.045336	0.0308874	0.0610842	0.0513616	0.0642126	0.0848948
805.675	0.859056	0.761356	0.858159	0.527743	0.457842	0.581088	0.654931	0.293674	0.341583	0.218613	0.375896	0.0470723	0.0742179	0.0472959							805.675	0.456451	0.609531	0.439371	0.015149	0.0792728	0.0630857		805.675	0.2609	0.230257	0.291229	0.0478191	0.0283368	0.059805	0.0518296	0.0650484	0.0826082
809.664	0.852083	0.785628	0.872884	0.530443	0.460217	0.594639	0.652005	0.293529	0.339448	0.219257	0.379814	0.0462135	0.0731023	0.0467101							809.664	0.452144	0.617384	0.44978	0.0122793	0.0797988	0.060912		809.664	0.259855	0.228924	0.29274	0.046503	0.0296528	0.0608722	0.0523908	0.0668833	0.0807653
813.652	0.852727	0.763457	0.878962	0.534507	0.463066	0.583132	0.655764	0.291108	0.348169	0.2176	0.374961	0.0476746	0.0724898	0.0461626							813.652	0.465626	0.620244	0.446792	0.013873	0.0779133	0.0610229		813.652	0.262511	0.230077	0.289571	0.0460461	0.0286542	0.0624013	0.0496176	0.0645224	0.0878219
817.641	0.849782	0.773685	0.86387	0.525889	0.471008	0.591876	0.666228	0.295206	0.342113	0.221424	0.379233	0.0483836	0.0716407	0.046077							817.641	0.460966	0.613182	0.448565	0.0155678	0.0789301	0.0642067		817.641	0.264265	0.228914	0.292969	0.0481712	0.029081	0.0619187	0.0543958	0.0641913	0.0865662
821.629	0.848799	0.778879	0.861332	0.533164	0.475593	0.584675	0.665492	0.297447	0.350652	0.22093	0.373815	0.0454485	0.0726914	0.0468215							821.629	0.456094	0.622585	0.441055	0.0142208	0.0769421	0.0613281		821.629	0.264116	0.228507	0.289919	0.0458184	0.0286149	0.0602837	0.0542643	0.0640183	0.0899826
825.618	0.851241	0.778512	0.85548	0.529957	0.472346	0.591893	0.673707	0.298308	0.337814	0.225131	0.379223	0.0460683	0.0739641	0.0478132							825.618	0.470598	0.620522	0.44064	0.0134106	0.0790607	0.059294		825.618	0.265305	0.229005	0.291846	0.0465076	0.0292723	0.061835	0.0525884	0.0615497	0.0894409
829.606	0.853301	0.785426	0.863991	0.531119	0.479949	0.609464	0.681005	0.29382	0.35201	0.224323	0.37384	0.0489588	0.0735558	0.0457849							829.606	0.467434	0.615308	0.441066	0.0150964	0.0755088	0.0602796		829.606	0.263144	0.226675	0.288786	0.0464355	0.0291276	0.0576271	0.050708	0.0608231	0.0882815
833.595	0.8491	0.795496	0.853597	0.533061	0.474472	0.606054	0.677929	0.296844	0.349113	0.220687	0.372867	0.0463726	0.0720035	0.0478687							833.595	0.466806	0.619219	0.442573	0.0137177	0.0747506	0.0595155		833.595	0.264493	0.231598	0.290137	0.0447955	0.0300754	0.0576197	0.0526355	0.0599197	0.0877964
837.583	0.842296	0.77551	0.856205	0.541208	0.48492	0.603815	0.673845	0.296366	0.348118	0.21972	0.376276	0.0460999	0.0713921	0.0447572							837.583	0.456801	0.621555	0.444044	0.0123731	0.0729583	0.0588197		837.583	0.264427	0.231027	0.293354	0.0472854	0.0318155	0.0562481	0.0524493	0.0611593	0.0875952
841.572	0.851531	0.784879	0.869933	0.54351	0.476086	0.599577	0.669576	0.296989	0.340066	0.21973	0.379671	0.0481712	0.0728205	0.0462601							841.572	0.46485	0.616265	0.443771	0.0155673	0.0732518	0.0599326		841.572	0.266818	0.232396	0.290117	0.0470187	0.0299293	0.0572464	0.0519121	0.0601254	0.0846712
845.56	0.851351	0.77458	0.876998	0.549719	0.481436	0.601841	0.677386	0.300737	0.340873	0.222441	0.380907	0.0473618	0.0721324	0.0476266							845.56	0.465583	0.609122	0.438717	0.0141147	0.0760542	0.0589829		845.56	0.266587	0.233287	0.291377	0.0452434	0.0297073	0.0588676	0.0512902	0.0586985	0.0880271
849.549	0.862429	0.794981	0.861867	0.552917	0.476216	0.60291	0.672076	0.299091	0.350761	0.223455	0.37982	0.0450223	0.0727697	0.0456903							849.549	0.466949	0.621132	0.444455	0.0128194	0.0731093	0.0618438		849.549	0.260953	0.233892	0.29425	0.0424131	0.0284449	0.0567851	0.050037	0.0576331	0.0859806
853.537	0.858711	0.788595	0.868035	0.549316	0.481078	0.59657	0.675006	0.302421	0.349796	0.225391	0.374135	0.0476382	0.0717396	0.0465774							853.537	0.456658	0.621421	0.440839	0.0123189	0.0737896	0.0589638		853.537	0.264324	0.233294	0.296759	0.045912	0.0285286	0.0586694	0.0486707	0.0586793	0.0869269
857.526	0.856639	0.777538	0.870806	0.556416	0.493212	0.588403	0.668517	0.301038	0.348043	0.221852	0.373556	0.0469463	0.0745061	0.0460684							857.526	0.460162	0.627079	0.43495	0.0152628	0.0773898	0.0577634		857.526	0.262922	0.235374	0.294443	0.0488575	0.0303895	0.0578679	0.0496617	0.057183	0.0874307
861.514	0.863695	0.786269	0.871216	0.548008	0.489676	0.584509	0.671696	0.30044	0.350168	0.223726	0.379218	0.0467729	0.0725436	0.0468607							861.514	0.466672	0.637797	0.443038	0.0111575	0.0775757	0.0592694		861.514	0.263225	0.232586	0.297911	0.0443978	0.0289618	0.0561118	0.0489706	0.0610693	0.0862673
865.503	0.875266	0.790086	0.871628	0.547969	0.48408	0.591169	0.676514	0.29823	0.34406	0.22474	0.376024	0.0466863	0.0719899	0.0469158							865.503	0.474731	0.640305	0.450015	0.0121214	0.0737734	0.0592007		865.503	0.263713	0.233687	0.294813	0.0447355	0.0289197	0.0590588	0.0497859	0.0578414	0.0875622
869.491	0.856529	0.790418	0.873268	0.545767	0.480482	0.587358	0.676187	0.298388	0.345072	0.225614	0.375916	0.046647	0.0721938	0.0459998							869.491	0.473086	0.636326	0.447769	0.0130643	0.0744628	0.0579825		869.491	0.263803	0.237935	0.297504	0.0440274	0.0279314	0.0582605	0.0488989	0.0579828	0.0851656
873.48	0.870605	0.806655	0.851418	0.547686	0.48393	0.589502	0.673428	0.300487	0.347554	0.228984	0.373464	0.0457616	0.0742938	0.0463988							873.48	0.470181	0.634528	0.448816	0.0103996	0.0766539	0.0560531		873.48	0.262863	0.236076	0.294562	0.0450205	0.0277708	0.0579928	0.0480944	0.0605586	0.0895855
877.468	0.866378	0.790836	0.865043	0.555457	0.481783	0.592979	0.675576	0.300206	0.353614	0.223925	0.372791	0.0467749	0.070426	0.0465316							877.468	0.474081	0.643884	0.454519	0.0123653	0.0754141	0.0579263		877.468	0.263661	0.235974	0.29861	0.0461797	0.0281273	0.0586671	0.0529535	0.0624578	0.0845738
881.457	0.877117	0.80093	0.86998	0.558871	0.481867	0.584293	0.682324	0.30528	0.347652	0.224236	0.367748	0.0444966	0.0686269	0.0474708							881.457	0.4757	0.642238	0.458208	0.014332	0.0759513	0.0580079		881.457	0.262522	0.23679	0.298151	0.0443723	0.0258071	0.0553388	0.0505533	0.0610954	0.0840932
885.445	0.891183	0.798611	0.884471	0.561822	0.482991	0.590348	0.675907	0.30505	0.354877	0.223643	0.37345	0.0454082	0.0685744	0.047003							885.445	0.471296	0.639124	0.454079	0.0134226	0.077701	0.0594069		885.445	0.266514	0.237069	0.298979	0.0463105	0.0251941	0.0582674	0.0498766	0.0572892	0.0851775
889.433	0.873943	0.783071	0.878002	0.562763	0.474828	0.596002	0.675583	0.302159	0.349288	0.228284	0.37721	0.0469623	0.0706621	0.0470503							889.433	0.473731	0.651259	0.452783	0.0119681	0.0743869	0.0592524		889.433	0.26804	0.240551	0.30109	0.0450652	0.0272701	0.0572126	0.0505273	0.0592972	0.0815652
893.422	0.866932	0.777723	0.88093	0.558992	0.477661	0.592242	0.677596	0.300136	0.348746	0.223431	0.379948	0.0490831	0.0681682	0.0472665							893.422	0.476776	0.64878	0.451963	0.0125831	0.0768834	0.0592304		893.422	0.268051	0.23951	0.300422	0.0421196	0.0256808	0.05855	0.0501149	0.0593382	0.0856801
