# Supplementary material for: Dynamic early clusters of nodal proteins contribute to node of Ranvier assembly during myelination of peripheral neurons
Source: eLife. 2021 Jul 9;10:e68089. doi: 10.7554/eLife.68089 (PMC8289411; doi:10.7554/eLife.68089)
Supplement: Figure 4—figure supplement 1—source data 1. [file elife-68089-fig4-figsupp1-data1.xlsx]

## Sheet: Sheet1
	Figure 4S1C-source data
	Recovery (%)
	Heminodes			Nodes
	WT	Caspr-/-	Nfasc-/-	WT	Caspr-/-	Nfasc-/-
	0.520992	0.478693	0.593813	-0.00186745	0.0948641	0.102213
	0.529819	0.523374	0.474388	-0.0405399	0.0430211	0.100006
	0.382762	0.476856	0.474003	2.4788e-05	0.0967776	0.135252
	0.51256	0.432962	0.473882	-0.0144934	0.0488166	0.138967
	0.420972	0.533621	0.526649	-0.0416389	0.152825	0.118519
					0.102192	0.164036
