# Supplementary material for: Dynamic early clusters of nodal proteins contribute to node of Ranvier assembly during myelination of peripheral neurons
Source: eLife. 2021 Jul 9;10:e68089. doi: 10.7554/eLife.68089 (PMC8289411; doi:10.7554/eLife.68089)
Supplement: Figure 4—figure supplement 2—source data 1. [file elife-68089-fig4-figsupp2-data1.xlsx]

## Sheet: Sheet1
		Figure 4S2B-source data							Figure 4S2C-source data				Figure 4S2E-source data							Figure 4S2F-source data
		Normalised intensity							Recovery (%)				Normalised intensity							Fluorescence Loss (%)
	Time (s)	FRAP			FRAP/FLIP				FRAP	FRAP/FLIP		Time (s)	WT			Caspr -/-				WT	Caspr-/-
	0	0	0	0	0	0	0		0.146451	0.0173956		0	0.993634	0.988621	0.977277	0.985291	0.989852	0.977785		5.47	34.24
	3.988	0.0105356	0.0108963	0.0149378	0.00823936	0.00656945	0.0113615		0.203189	0.0283812		3.988	0.987978	0.993033	0.98608	0.9836	0.999112	0.983981		2.29	35.9139
	7.977	0.0156715	0.0198459	0.0229595	0.0119587	0.0104328	0.0177517		0.156068	0.0360981		7.977	0.991855	0.991526	0.99086	0.977805	0.989456	0.981899		8.68	35.3169
	11.965	0.0208512	0.0256096	0.0277325	0.0135794	0.0142829	0.0185672					11.965	0.99041	0.984796	0.983404	0.979989	0.993803	0.981783
	15.954	0.0252251	0.0317501	0.0334125	0.0156436	0.0160788	0.0231066					15.954	0.985029	0.972384	0.976455	0.973994	0.993173	0.988699
	19.942	0.0276505	0.0386896	0.0371567	0.0165163	0.0155785	0.0220933					19.942	0.98555	0.982501	0.979232	0.96701	0.99244	0.980972
	23.931	0.0304876	0.0402032	0.0395628	0.019716	0.0160222	0.0244348					23.931	0.985368	0.970797	0.981826	0.969369	0.991686	0.983429
	27.919	0.0334695	0.0456374	0.0430317	0.0188718	0.0180149	0.0259004					27.919	0.986635	0.981426	0.977352	0.961312	0.99054	0.9771
	31.908	0.0350992	0.0475449	0.0442171	0.0215926	0.0188326	0.0273791					31.908	0.98693	0.969137	0.973913	0.958212	0.984342	0.985126
	35.896	0.0380711	0.0508473	0.0467066	0.0223988	0.0201288	0.0278946					35.896	0.983177	0.961921	0.979139	0.96451	0.980786	0.971636
	39.885	0.0410382	0.0549786	0.050984	0.0215028	0.01989	0.030012					39.885	0.979782	0.95608	0.972761	0.952474	0.978441	0.967579
	43.873	0.042745	0.0570381	0.0519895	0.0234062	0.0214625	0.0316248					43.873	0.982204	0.957125	0.973336	0.956435	0.978766	0.967931
	47.862	0.0440288	0.057481	0.0538814	0.0247711	0.0217529	0.0307086					47.862	0.984423	0.961746	0.975282	0.957723	0.971106	0.962517
	51.85	0.0457515	0.0599714	0.0544411	0.0248594	0.0240059	0.0319444					51.85	0.9701	0.949059	0.97629	0.95836	0.974707	0.961179
	55.839	0.0457246	0.0606957	0.0581131	0.0256319	0.0223706	0.0332782					55.839	0.978615	0.95642	0.979005	0.944017	0.975492	0.95415
	59.827	0.0484038	0.0647808	0.0590248	0.0259001	0.0247886	0.0343841					59.827	0.968892	0.965268	0.97398	0.946897	0.974317	0.942574
	63.816	0.048907	0.067621	0.0612875	0.0262931	0.0245439	0.0332522					63.816	0.9681	0.969152	0.963407	0.942103	0.975628	0.937538
	67.804	0.0508627	0.0675361	0.0617904	0.0275755	0.0251214	0.035582					67.804	0.969591	0.977441	0.966637	0.933134	0.966453	0.934802
	71.793	0.0529619	0.071883	0.0634487	0.0283811	0.0264268	0.0365371					71.793	0.975085	0.974388	0.969808	0.935947	0.97091	0.947808
	75.781	0.0545731	0.0739452	0.0648297	0.0276519	0.0263145	0.0357747					75.781	0.970473	0.962909	0.970573	0.933129	0.959007	0.934194
	79.77	0.0559955	0.0767597	0.0665959	0.0293545	0.0262143	0.0391226					79.77	0.968963	0.967013	0.965364	0.930941	0.964774	0.933085
	83.758	0.0570043	0.080105	0.0647407	0.0282237	0.0276702	0.0383895					83.758	0.9697	0.960473	0.962853	0.927212	0.957439	0.921521
	87.747	0.0598683	0.0802093	0.0680468	0.0279262	0.0280279	0.0402513					87.747	0.96876	0.95848	0.961325	0.92385	0.962252	0.916833
	91.735	0.0611721	0.083202	0.0674995	0.0300809	0.0295825	0.0384079					91.735	0.974444	0.968418	0.963144	0.920502	0.951836	0.912155
	95.724	0.0613797	0.08458	0.0716022	0.0281757	0.0276767	0.0392862					95.724	0.966291	0.966403	0.958493	0.911908	0.951283	0.919843
	99.712	0.0625322	0.0855041	0.070196	0.0284263	0.0284422	0.042763					99.712	0.967799	0.974877	0.959374	0.91833	0.955975	0.921163
	103.701	0.0638952	0.0892712	0.072885	0.0287829	0.0274896	0.0411511					103.701	0.966488	0.980936	0.949632	0.91451	0.942322	0.915296
	107.689	0.0655592	0.0897172	0.0723627	0.0284565	0.0271784	0.0409008					107.689	0.960006	0.973817	0.952166	0.913754	0.945685	0.911643
	111.678	0.0680475	0.0923409	0.0762957	0.0286156	0.0285528	0.0420764					111.678	0.959726	0.971399	0.959632	0.902901	0.936148	0.91117
	115.666	0.068076	0.0923739	0.0745703	0.0291419	0.0273893	0.0396671					115.666	0.959695	0.980676	0.95777	0.903145	0.934607	0.912119
	119.655	0.0678414	0.0908009	0.073928	0.0301903	0.0303644	0.0420667					119.655	0.968337	0.961954	0.955053	0.90794	0.927268	0.910525
	123.643	0.0694802	0.0942694	0.0755732	0.0304964	0.0294962	0.0399438					123.643	0.9627	0.957072	0.95563	0.900813	0.919097	0.907316
	127.632	0.0692085	0.100844	0.0776239	0.0296263	0.0304118	0.0401518					127.632	0.964672	0.947119	0.947954	0.903438	0.925837	0.903422
	131.62	0.0706301	0.0960974	0.0767137	0.0312918	0.0280736	0.0414702					131.62	0.965014	0.955754	0.952814	0.902157	0.922968	0.896127
	135.609	0.072137	0.0966611	0.0778727	0.0324495	0.0298054	0.0420331					135.609	0.95986	0.950148	0.952398	0.900683	0.916542	0.902943
	139.597	0.0735381	0.100081	0.0790919	0.0297991	0.0300977	0.0418207					139.597	0.961695	0.958488	0.951597	0.894188	0.907073	0.894112
	143.586	0.0743248	0.101172	0.0795197	0.0294233	0.0308195	0.041196					143.586	0.961219	0.978199	0.950279	0.890973	0.906971	0.888526
	147.574	0.0735538	0.100838	0.0819998	0.0305198	0.0318648	0.0419881					147.574	0.958734	0.980893	0.956617	0.880689	0.903145	0.884016
	151.563	0.0775214	0.103583	0.0840427	0.031374	0.0332679	0.0410758					151.563	0.953545	0.980805	0.952715	0.881233	0.90244	0.884386
	155.551	0.0753584	0.104085	0.0832183	0.0308414	0.0319842	0.0399791					155.551	0.962536	0.985852	0.954903	0.875404	0.902747	0.8815
	159.54	0.0765348	0.106246	0.0839372	0.0312026	0.0326078	0.0440803					159.54	0.957544	0.997032	0.959882	0.875287	0.906356	0.878804
	163.528	0.0782425	0.105236	0.0843173	0.0302863	0.0315937	0.0405372					163.528	0.960421	0.989955	0.948772	0.874128	0.899559	0.875287
	167.516	0.078791	0.108887	0.0873014	0.0301363	0.0328022	0.0446256					167.516	0.95383	0.980156	0.955093	0.869781	0.889228	0.88134
	171.505	0.0805455	0.107756	0.0893728	0.0296932	0.0335673	0.0439265					171.505	0.958537	0.991052	0.953257	0.872977	0.894421	0.876964
	175.493	0.0801812	0.107617	0.0875361	0.0305605	0.0323733	0.0425876					175.493	0.960391	0.987061	0.959931	0.871406	0.894626	0.879217
	179.482	0.0820101	0.108829	0.0900373	0.0306616	0.0336581	0.0428871					179.482	0.956239	0.987025	0.954639	0.868846	0.893573	0.877857
	183.47	0.0824894	0.111942	0.0915106	0.0313883	0.0326994	0.0416263					183.47	0.954993	0.990331	0.945949	0.866963	0.888497	0.872071
	187.459	0.0840421	0.112135	0.0908052	0.0290506	0.0328408	0.0405554					187.459	0.962971	0.994785	0.94934	0.849049	0.88499	0.86628
	191.447	0.0829234	0.114305	0.0903369	0.028543	0.0341172	0.0407408					191.447	0.952199	1.00052	0.950516	0.849945	0.882707	0.866906
	195.436	0.0845981	0.114014	0.0918112	0.0296455	0.0330582	0.0392918					195.436	0.955169	0.991132	0.945367	0.853424	0.878061	0.863112
	199.424	0.0859338	0.115641	0.0913385	0.0298283	0.0342647	0.0419331					199.424	0.95169	0.998612	0.943599	0.846656	0.886753	0.863315
	203.413	0.086087	0.115338	0.0960479	0.0291414	0.0339836	0.0440307					203.413	0.951685	0.994101	0.943167	0.843836	0.877195	0.865491
	207.401	0.0870898	0.116318	0.0966063	0.0294116	0.0336003	0.0408034					207.401	0.951728	0.98854	0.944829	0.85228	0.885378	0.865392
	211.39	0.088416	0.116067	0.0937625	0.0299905	0.0325359	0.0424246					211.39	0.949634	0.973719	0.947743	0.848646	0.881991	0.856379
	215.378	0.0886704	0.119449	0.0961225	0.0292399	0.0335129	0.0405505					215.378	0.952413	0.973051	0.948808	0.849428	0.870054	0.846863
	219.367	0.0907583	0.119837	0.0982303	0.0285885	0.0325417	0.0405312					219.367	0.966429	0.992027	0.954841	0.84326	0.870432	0.854638
	223.355	0.0898887	0.117544	0.0973798	0.0291743	0.0334253	0.0414999					223.355	0.95989	0.993184	0.949213	0.836632	0.874613	0.85749
	227.344	0.0907548	0.117385	0.0984921	0.0300056	0.0328355	0.0413055					227.344	0.956639	0.988065	0.951032	0.838943	0.868878	0.853915
	231.332	0.0923718	0.122336	0.101007	0.0297522	0.0337616	0.042187					231.332	0.959684	0.985513	0.9549	0.828338	0.872314	0.853295
	235.321	0.0943729	0.122009	0.100744	0.0301531	0.0329806	0.0416117					235.321	0.964294	1.00277	0.949239	0.820855	0.866445	0.841144
	239.309	0.0940963	0.119109	0.101409	0.0302455	0.034658	0.0444868					239.309	0.966739	0.989805	0.953758	0.824578	0.857796	0.842332
	243.298	0.0952041	0.122813	0.101114	0.0295951	0.0332699	0.0411895					243.298	0.967396	0.995797	0.953893	0.821735	0.851017	0.83869
	247.286	0.0963363	0.123299	0.102216	0.0281987	0.032405	0.0415403					247.286	0.966342	0.995769	0.948166	0.812564	0.848097	0.839438
	251.275	0.097132	0.126605	0.10183	0.0300752	0.0343682	0.0397501					251.275	0.96205	0.987121	0.939842	0.815103	0.848589	0.831356
	255.263	0.0963585	0.127397	0.104218	0.0292247	0.0342168	0.0410834					255.263	0.961602	0.983336	0.942584	0.810413	0.855448	0.828367
	259.252	0.0980916	0.127654	0.102332	0.0295277	0.0341702	0.0420837					259.252	0.95529	0.976637	0.946451	0.814818	0.846137	0.831904
	263.24	0.0998868	0.127247	0.104388	0.0288748	0.0329498	0.0417348					263.24	0.957369	0.970647	0.938298	0.81493	0.83813	0.82587
	267.229	0.103402	0.126334	0.104938	0.0292373	0.0328442	0.0416217					267.229	0.95209	0.985591	0.942694	0.818666	0.841242	0.827969
	271.217	0.101434	0.128874	0.103303	0.0288468	0.0349697	0.0407847					271.217	0.953685	0.987595	0.938223	0.818437	0.840687	0.816882
	275.206	0.101461	0.130936	0.107122	0.0289288	0.0347423	0.0416224					275.206	0.952753	0.96775	0.937191	0.815751	0.840016	0.822812
	279.194	0.102055	0.129819	0.107541	0.0283098	0.034208	0.0408115					279.194	0.956373	0.968527	0.939079	0.818297	0.833618	0.804332
	283.183	0.100083	0.128905	0.104372	0.0293129	0.0338544	0.0408125					283.183	0.959102	0.958752	0.939427	0.809773	0.839807	0.805818
	287.171	0.100446	0.130978	0.106873	0.0282015	0.0348774	0.0397949					287.171	0.954755	0.963929	0.944074	0.810929	0.839335	0.800276
	291.16	0.102725	0.131351	0.107616	0.028466	0.0363663	0.041186					291.16	0.952425	0.959304	0.944154	0.810129	0.83127	0.794742
	295.148	0.106006	0.132268	0.109603	0.0278632	0.0352411	0.040937					295.148	0.951539	0.959216	0.948637	0.813759	0.840702	0.794494
	299.137	0.104664	0.135435	0.108271	0.0280634	0.0352947	0.0419979					299.137	0.957789	0.9718	0.948548	0.820226	0.838916	0.792833
	303.125	0.103844	0.139053	0.110052	0.0276955	0.0330393	0.0401418					303.125	0.961615	0.962981	0.944665	0.814679	0.838273	0.787424
	307.114	0.105395	0.136425	0.110505	0.0276712	0.0359326	0.0407623					307.114	0.964565	0.953252	0.945583	0.817594	0.828967	0.786158
	311.102	0.107338	0.134568	0.110468	0.0280237	0.0334843	0.0398036					311.102	0.962488	0.951793	0.941108	0.809208	0.827444	0.785898
	315.091	0.106003	0.13699	0.112946	0.0280422	0.0344761	0.040559					315.091	0.961127	0.951385	0.948081	0.802869	0.823349	0.784478
	319.079	0.105384	0.135702	0.114806	0.0265054	0.0334623	0.0422466					319.079	0.964591	0.962849	0.953831	0.809416	0.822789	0.789422
	323.068	0.107955	0.136436	0.112579	0.0278575	0.0350888	0.0408477					323.068	0.958479	0.967563	0.941335	0.805459	0.819982	0.777168
	327.056	0.109048	0.138756	0.114902	0.0276769	0.0362881	0.0384524					327.056	0.955861	0.977016	0.938609	0.802877	0.824469	0.77725
	331.045	0.109658	0.137907	0.115445	0.027502	0.0356658	0.041842					331.045	0.952507	0.963788	0.942776	0.803304	0.82101	0.77249
	335.033	0.10831	0.142963	0.114893	0.0270817	0.0363839	0.0413223					335.033	0.955893	0.961491	0.947274	0.807651	0.825101	0.765944
	339.022	0.106906	0.141775	0.115629	0.0270902	0.0349966	0.0412711					339.022	0.954274	0.944809	0.947909	0.802878	0.818004	0.768915
	343.01	0.108469	0.141188	0.115121	0.0268433	0.0342995	0.0399363					343.01	0.951205	0.955515	0.944726	0.801726	0.816167	0.768515
	346.999	0.109325	0.140979	0.116787	0.0274517	0.0347528	0.0399702					346.999	0.951676	0.971486	0.940912	0.798365	0.814059	0.763595
	350.987	0.108646	0.144049	0.114238	0.0266695	0.0340734	0.0381702					350.987	0.954161	0.951959	0.943172	0.803794	0.805325	0.761958
	354.976	0.108034	0.143451	0.116565	0.026908	0.0342522	0.041004					354.976	0.958896	0.952174	0.94099	0.795472	0.806042	0.75853
	358.964	0.111578	0.143938	0.114993	0.0260786	0.0339179	0.0408234					358.964	0.94718	0.957838	0.938814	0.79381	0.805887	0.758566
	362.953	0.111313	0.144769	0.115474	0.0262179	0.0340179	0.0396678					362.953	0.951507	0.954972	0.941399	0.796621	0.806199	0.755861
	366.941	0.111006	0.1473	0.116027	0.0278537	0.0341243	0.0396975					366.941	0.945124	0.964551	0.934412	0.80208	0.801124	0.763329
	370.93	0.115401	0.14699	0.114119	0.0280917	0.0335197	0.0382498					370.93	0.948983	0.95397	0.934202	0.79695	0.801498	0.760472
	374.918	0.115342	0.143969	0.117138	0.0263117	0.0343502	0.0400112					374.918	0.951595	0.959879	0.934205	0.795619	0.804154	0.747463
	378.907	0.114266	0.145986	0.114952	0.0271714	0.0329161	0.0371957					378.907	0.954558	0.963124	0.934143	0.791932	0.79291	0.749023
	382.895	0.11253	0.148772	0.11516	0.0265337	0.0323814	0.038778					382.895	0.947094	0.975304	0.933573	0.786382	0.792421	0.749153
	386.884	0.116108	0.14885	0.114489	0.0259442	0.0330091	0.0395667					386.884	0.950496	0.974392	0.931645	0.793657	0.787638	0.748118
	390.872	0.114718	0.145003	0.11627	0.0276694	0.0322117	0.0397188					390.872	0.957259	0.963541	0.930011	0.792832	0.792942	0.74951
	394.861	0.112577	0.147787	0.114592	0.027715	0.0337097	0.037137					394.861	0.946969	0.97079	0.937911	0.789634	0.789729	0.752378
	398.849	0.114083	0.150926	0.116401	0.0263052	0.0315151	0.0381094					398.849	0.949929	0.978401	0.933547	0.789191	0.787461	0.751009
	402.838	0.115052	0.1475	0.116319	0.0268697	0.0332698	0.0403664					402.838	0.959651	0.978437	0.932761	0.781738	0.786031	0.754718
	406.826	0.117745	0.150197	0.115238	0.0263058	0.0317772	0.0385619					406.826	0.949358	0.967782	0.935163	0.778188	0.78807	0.750722
	410.815	0.116025	0.149374	0.117886	0.0281901	0.0312071	0.0378534					410.815	0.948646	0.978921	0.939675	0.778036	0.7822	0.748627
	414.803	0.114822	0.151599	0.11834	0.0265777	0.031301	0.0395542					414.803	0.956989	0.982162	0.941324	0.778719	0.778746	0.75129
	418.791	0.115398	0.150884	0.118197	0.0261802	0.0318403	0.0391787					418.791	0.949539	0.979412	0.939364	0.7796	0.778962	0.747244
	422.78	0.116015	0.152723	0.119499	0.0268329	0.0316832	0.0391119					422.78	0.953726	0.988844	0.931118	0.776203	0.776905	0.748453
	426.768	0.115199	0.153442	0.12054	0.0267349	0.0328747	0.0398947					426.768	0.954396	0.968621	0.94347	0.772877	0.776061	0.741971
	430.757	0.118164	0.152938	0.120673	0.0257481	0.0329366	0.040492					430.757	0.955916	0.985158	0.937997	0.778356	0.777442	0.755833
	434.745	0.118933	0.15024	0.120866	0.0259807	0.0316351	0.0406574					434.745	0.959622	0.984502	0.936047	0.775221	0.781593	0.754113
	438.734	0.118555	0.15219	0.119587	0.0254417	0.0313886	0.0400582					438.734	0.957349	0.982747	0.942626	0.769023	0.769374	0.773153
	442.722	0.117658	0.154855	0.119934	0.0257817	0.031618	0.037643					442.722	0.955839	0.975511	0.942275	0.768906	0.760491	0.764408
	446.711	0.116863	0.15328	0.121303	0.0255164	0.0307317	0.0400544					446.711	0.962726	0.978565	0.94545	0.768123	0.760641	0.763823
	450.699	0.120668	0.156438	0.121563	0.0252818	0.0317986	0.0387026					450.699	0.960521	0.97656	0.933482	0.766242	0.760515	0.762021
	454.688	0.118092	0.15421	0.122471	0.0256758	0.0337077	0.0395958					454.688	0.960216	0.988125	0.945975	0.764296	0.754509	0.767869
	458.676	0.122203	0.157356	0.123911	0.0262497	0.0315278	0.0404051					458.676	0.956933	0.975813	0.94453	0.763932	0.762639	0.766815
	462.665	0.120865	0.156872	0.123642	0.0253336	0.0310402	0.0411096					462.665	0.962174	0.97977	0.940324	0.760164	0.759381	0.771063
	466.653	0.121823	0.156953	0.122419	0.0266715	0.0316632	0.0420462					466.653	0.956447	0.97583	0.945762	0.760049	0.753507	0.764269
	470.642	0.122978	0.158643	0.121758	0.0264593	0.032716	0.0382079					470.642	0.959385	0.965825	0.9381	0.767397	0.751308	0.765366
	474.63	0.12299	0.162851	0.125376	0.0246446	0.0329591	0.0364853					474.63	0.962488	0.966876	0.937932	0.761854	0.752991	0.759173
	478.619	0.121416	0.164444	0.124279	0.0257435	0.0317982	0.0408842					478.619	0.948064	0.962185	0.943969	0.759863	0.752398	0.757858
	482.607	0.122282	0.162125	0.123195	0.025821	0.0318205	0.0381736					482.607	0.95349	0.976379	0.936995	0.758617	0.744008	0.755001
	486.596	0.122982	0.162757	0.123839	0.0249415	0.0302225	0.0379324					486.596	0.958843	0.971216	0.936937	0.751195	0.751753	0.757437
	490.584	0.122081	0.162214	0.124831	0.0246511	0.0306736	0.0375226					490.584	0.956283	0.97392	0.935859	0.755187	0.75043	0.759158
	494.573	0.121771	0.162522	0.127162	0.0244986	0.0306221	0.0381378					494.573	0.963698	0.969239	0.936742	0.75017	0.744132	0.744174
	498.561	0.123461	0.161501	0.125817	0.0262023	0.0321061	0.0373114					498.561	0.945358	0.971218	0.940482	0.749552	0.746316	0.752685
	502.55	0.122843	0.16675	0.125953	0.0234832	0.0306173	0.0377927					502.55	0.951056	0.973629	0.93275	0.750685	0.742427	0.751473
	506.538	0.125664	0.163431	0.128531	0.0239741	0.0312479	0.0384514					506.538	0.949413	0.96591	0.939374	0.750051	0.745891	0.762144
	510.527	0.126671	0.162117	0.127079	0.0251787	0.0306954	0.0375529					510.527	0.944555	0.965261	0.940561	0.749336	0.746686	0.755974
	514.515	0.12524	0.164733	0.1284	0.0244613	0.0313276	0.0364268					514.515	0.949951	0.967425	0.92936	0.753247	0.746934	0.749876
	518.504	0.12338	0.166246	0.128886	0.0262752	0.0312303	0.0379005					518.504	0.95373	0.971334	0.937847	0.744916	0.739585	0.743716
	522.492	0.12376	0.169143	0.129787	0.0254725	0.0329444	0.0380658					522.492	0.954224	0.969154	0.929647	0.748623	0.736177	0.744067
	526.481	0.123513	0.168503	0.127907	0.0245149	0.0324877	0.0381262					526.481	0.956778	0.984176	0.936038	0.745794	0.7284	0.740769
	530.469	0.123689	0.169884	0.130337	0.0255523	0.031482	0.0401369					530.469	0.957641	0.966715	0.934846	0.74674	0.734761	0.734706
	534.458	0.124998	0.169878	0.133072	0.0250393	0.0319243	0.0366693					534.458	0.960586	0.98971	0.936812	0.74442	0.733004	0.736329
	538.446	0.124382	0.17646	0.132443	0.0253144	0.0318741	0.0396514					538.446	0.959034	0.97109	0.933332	0.75098	0.746308	0.736546
	542.435	0.123126	0.170389	0.131404	0.0232455	0.0312405	0.0382875					542.435	0.956179	0.970887	0.918544	0.752209	0.731187	0.732144
	546.423	0.126166	0.169111	0.129125	0.0227733	0.0307963	0.0379857					546.423	0.961753	0.980301	0.925431	0.745827	0.733145	0.727186
	550.412	0.127308	0.17348	0.133122	0.0243921	0.030358	0.0388603					550.412	0.954156	0.979129	0.925941	0.744251	0.731355	0.732774
	554.4	0.127823	0.177408	0.132188	0.0247824	0.0306151	0.0371939					554.4	0.950799	0.979349	0.928685	0.742171	0.729463	0.732429
	558.389	0.125738	0.17557	0.132945	0.0250348	0.0302186	0.0379046					558.389	0.958558	0.980397	0.930404	0.747084	0.730064	0.720413
	562.377	0.128232	0.175254	0.132397	0.0244153	0.0300791	0.0377298					562.377	0.952713	0.985932	0.9277	0.746014	0.731024	0.722933
	566.366	0.129656	0.178767	0.134694	0.0232782	0.0313604	0.0396274					566.366	0.95763	1.00052	0.934633	0.743097	0.738451	0.723806
	570.354	0.13173	0.178383	0.132247	0.0234388	0.0320521	0.0392877					570.354	0.9533	0.996356	0.932895	0.750769	0.725132	0.730309
	574.343	0.129637	0.178688	0.135323	0.0240156	0.0318091	0.0398865					574.343	0.956684	0.983088	0.933898	0.737282	0.72684	0.719105
	578.331	0.13171	0.1809	0.135245	0.0222869	0.0321106	0.0383807					578.331	0.953967	0.983047	0.928859	0.744002	0.722253	0.730491
	582.32	0.131249	0.181236	0.136605	0.0238022	0.0302647	0.0380897					582.32	0.956477	0.994702	0.927038	0.734543	0.718384	0.728664
	586.308	0.130631	0.182708	0.137903	0.0242236	0.0296429	0.0373929					586.308	0.956978	0.983394	0.932714	0.740327	0.718485	0.731913
	590.297	0.131014	0.187897	0.140411	0.0231111	0.0315165	0.0364686					590.297	0.956562	0.990216	0.928846	0.742662	0.720289	0.727702
	594.285	0.128797	0.186971	0.137284	0.021179	0.0315985	0.0373073					594.285	0.958309	0.987857	0.934118	0.731127	0.714291	0.718484
	598.274	0.130719	0.188236	0.134566	0.0222675	0.0313395	0.0356897					598.274	0.955423	0.974621	0.93125	0.738698	0.710764	0.718606
	602.262	0.130797	0.183263	0.137994	0.0213244	0.0303555	0.0381858					602.262	0.955199	0.98017	0.932872	0.733169	0.710713	0.719628
	606.251	0.131236	0.182459	0.140459	0.0213769	0.0303772	0.0371098					606.251	0.956076	0.994786	0.929853	0.733007	0.710549	0.718785
	610.239	0.133154	0.184495	0.141231	0.02115	0.0314279	0.0379767					610.239	0.955459	0.96726	0.92962	0.735837	0.710626	0.721842
	614.228	0.130483	0.184668	0.14097	0.0202133	0.0302494	0.0374586					614.228	0.951702	0.979889	0.928273	0.733727	0.708658	0.721929
	618.216	0.130497	0.185674	0.140225	0.0218565	0.0297659	0.036258					618.216	0.9511	0.973955	0.931956	0.732691	0.710769	0.718046
	622.205	0.128448	0.187439	0.138505	0.0216407	0.0303215	0.036462					622.205	0.95159	0.988621	0.928039	0.729406	0.699719	0.720285
	626.193	0.13096	0.183251	0.142245	0.0212812	0.0309797	0.0364846					626.193	0.94867	0.969208	0.935412	0.72124	0.697026	0.71906
	630.182	0.13138	0.183452	0.143025	0.0206272	0.0312354	0.0370034					630.182	0.955775	0.980608	0.930112	0.722588	0.704155	0.712195
	634.17	0.131081	0.183546	0.141634	0.0219345	0.0316541	0.0381434					634.17	0.955384	0.982766	0.927168	0.721755	0.699928	0.712168
	638.159	0.13223	0.187919	0.142257	0.0215879	0.0311371	0.0359923					638.159	0.955479	0.978085	0.93246	0.717806	0.697686	0.717864
	642.147	0.132239	0.188239	0.144248	0.0215644	0.0323967	0.0368893					642.147	0.952034	0.999244	0.927704	0.716012	0.700599	0.718685
	646.136	0.132262	0.186986	0.145117	0.0212687	0.031411	0.0347701					646.136	0.962312	0.984143	0.931348	0.71957	0.6956	0.711112
	650.124	0.133181	0.185926	0.146057	0.0215131	0.0320959	0.035196					650.124	0.9592	0.981218	0.930165	0.714467	0.692823	0.715311
	654.113	0.134171	0.189524	0.144487	0.021175	0.031959	0.0359766					654.113	0.962316	0.973448	0.921428	0.715721	0.689735	0.706044
	658.101	0.131353	0.186877	0.146861	0.0198433	0.0301134	0.0360441					658.101	0.959155	0.991675	0.928724	0.715305	0.687021	0.712699
	662.089	0.134428	0.186343	0.149339	0.0194313	0.0304814	0.0353564					662.089	0.956821	0.972962	0.931929	0.713561	0.687402	0.700863
	666.078	0.133412	0.194298	0.146551	0.0190499	0.0307466	0.0348273					666.078	0.957982	0.969473	0.916706	0.705318	0.684239	0.70607
	670.066	0.135779	0.187753	0.14777	0.0184681	0.0311918	0.0352182					670.066	0.96092	0.956256	0.920735	0.706819	0.689404	0.707379
	674.055	0.136883	0.187774	0.146671	0.0200548	0.0293556	0.0349766					674.055	0.961929	0.964059	0.917642	0.7049	0.690718	0.712679
	678.043	0.136392	0.189511	0.149398	0.0199933	0.0311599	0.0348478					678.043	0.957721	0.977262	0.924851	0.704329	0.691545	0.702786
	682.032	0.137706	0.191677	0.147187	0.0205167	0.0319904	0.0338717					682.032	0.958313	0.962135	0.914462	0.707395	0.691116	0.70636
	686.02	0.134996	0.189174	0.148067	0.022018	0.0306692	0.0335076					686.02	0.958546	0.967932	0.916544	0.705426	0.690214	0.703533
	690.009	0.135704	0.191085	0.148962	0.0195415	0.0304783	0.0323321					690.009	0.955593	0.977947	0.913969	0.70547	0.690264	0.705258
	693.997	0.136324	0.193283	0.149118	0.0191648	0.0315914	0.0349602					693.997	0.962473	0.971889	0.920538	0.711349	0.687382	0.708008
	697.986	0.135651	0.18761	0.148005	0.0191707	0.0295816	0.0346764					697.986	0.964523	0.970015	0.916758	0.706148	0.687516	0.693817
	701.974	0.136113	0.191638	0.14826	0.0193207	0.0307253	0.0346724					701.974	0.962049	0.961541	0.920452	0.703739	0.680825	0.692931
	705.963	0.137444	0.196338	0.150813	0.0201886	0.0307701	0.0349843					705.963	0.966954	0.958312	0.919527	0.71363	0.679513	0.698537
	709.951	0.136239	0.189662	0.147986	0.0192955	0.0312945	0.0355879					709.951	0.967202	0.958402	0.920569	0.704251	0.679903	0.692239
	713.94	0.137123	0.192038	0.147434	0.018145	0.0290934	0.0342812					713.94	0.964778	0.958145	0.925609	0.703674	0.677409	0.699304
	717.928	0.135774	0.196682	0.148287	0.0179576	0.0311898	0.0360696					717.928	0.963634	0.97091	0.924408	0.707279	0.675742	0.696204
	721.917	0.134269	0.197918	0.148414	0.0182599	0.0284822	0.0360096					721.917	0.962558	0.95605	0.926391	0.701177	0.674233	0.694046
	725.905	0.135632	0.191287	0.147889	0.0181513	0.0296206	0.0361531					725.905	0.969437	0.966479	0.925217	0.70127	0.668018	0.692554
	729.894	0.135704	0.192389	0.148729	0.0168269	0.0282356	0.0361916					729.894	0.974614	0.962734	0.918371	0.70007	0.669083	0.691355
	733.882	0.135474	0.19505	0.148423	0.0188469	0.0284637	0.0361413					733.882	0.9683	0.962119	0.919168	0.699812	0.667595	0.68301
	737.871	0.138394	0.196777	0.149746	0.0190388	0.0280088	0.034462					737.871	0.970244	0.973062	0.917109	0.701634	0.670285	0.687701
	741.859	0.138069	0.195454	0.148603	0.0188064	0.0278171	0.0343759					741.859	0.961105	0.970205	0.917791	0.694635	0.664787	0.681424
	745.848	0.138979	0.196008	0.148333	0.0172962	0.028286	0.0353863					745.848	0.966127	0.959279	0.922863	0.6996	0.664806	0.67408
	749.836	0.139189	0.191852	0.149383	0.0183747	0.0295497	0.034561					749.836	0.963383	0.964295	0.920435	0.69587	0.665637	0.683853
	753.825	0.139411	0.195597	0.149206	0.0190105	0.0289201	0.0345355					753.825	0.961684	0.95913	0.920442	0.691873	0.663691	0.683271
	757.813	0.1411	0.196131	0.152726	0.0185689	0.027775	0.0359161					757.813	0.964994	0.955556	0.913804	0.687097	0.668794	0.684287
	761.802	0.141354	0.196136	0.147993	0.0188477	0.0297243	0.0333439					761.802	0.959439	0.956488	0.915981	0.692174	0.665974	0.677682
	765.79	0.139883	0.196388	0.146915	0.0204739	0.0288348	0.0355395					765.79	0.95753	0.972253	0.925035	0.691822	0.670106	0.683627
	769.779	0.146391	0.197204	0.146601	0.0182102	0.0288781	0.032808					769.779	0.951635	0.978853	0.913482	0.690549	0.664291	0.676621
	773.767	0.144513	0.198807	0.146548	0.0181618	0.029953	0.0352745					773.767	0.95912	0.977675	0.910934	0.690372	0.662466	0.674828
	777.756	0.143873	0.195321	0.149493	0.0182598	0.030027	0.0378919					777.756	0.956005	0.967831	0.914195	0.686995	0.660076	0.675213
	781.744	0.144549	0.198933	0.149551	0.0165162	0.0284723	0.0370041					781.744	0.957273	0.982172	0.921041	0.684186	0.663698	0.667342
	785.733	0.143467	0.196893	0.15178	0.0169636	0.0284171	0.035754					785.733	0.955872	0.976901	0.918931	0.680432	0.661038	0.663051
	789.721	0.142449	0.19814	0.149959	0.0169954	0.0268853	0.0357527					789.721	0.951056	0.973654	0.916467	0.676261	0.659847	0.669701
	793.71	0.142667	0.195591	0.149649	0.018368	0.0302428	0.0367109					793.71	0.95728	0.962447	0.909838	0.68428	0.657704	0.669725
	797.698	0.142853	0.196396	0.154227	0.017596	0.0287176	0.0356477					797.698	0.947798	0.981498	0.903185	0.680774	0.662753	0.668113
	801.687	0.144264	0.195753	0.152387	0.0179143	0.0308265	0.0350909					801.687	0.945887	0.969826	0.908129	0.679096	0.655859	0.665454
	805.675	0.145338	0.197606	0.15289	0.0183926	0.0297284	0.0347333					805.675	0.951282	0.983542	0.914787	0.672901	0.656211	0.664631
	809.664	0.145487	0.198181	0.152201	0.018234	0.0289891	0.0343924					809.664	0.9521	0.963437	0.910257	0.674617	0.658077	0.66507
	813.652	0.145858	0.19718	0.150861	0.0187949	0.0309287	0.0343667					813.652	0.946671	0.974943	0.908117	0.672138	0.656741	0.659397
	817.641	0.144935	0.19902	0.15217	0.0180385	0.029417	0.0330327					817.641	0.945442	0.967801	0.913022	0.672741	0.652147	0.665334
	821.629	0.145323	0.196034	0.15146	0.0192414	0.0284205	0.034487					821.629	0.946529	0.97078	0.909447	0.67053	0.651604	0.657954
	825.618	0.144263	0.1958	0.150357	0.0193562	0.0299324	0.0336635					825.618	0.948123	0.966978	0.904284	0.665252	0.652411	0.660065
	829.606	0.146094	0.198298	0.150748	0.0189819	0.0290266	0.0340706					829.606	0.945974	0.965222	0.906629	0.667327	0.650912	0.655225
	833.595	0.145324	0.198429	0.15099	0.0185182	0.0288196	0.0344216					833.595	0.945789	0.976127	0.910346	0.662495	0.64631	0.657341
	837.583	0.146826	0.202614	0.151359	0.0184362	0.0299627	0.0346806					837.583	0.951047	0.987282	0.908573	0.665103	0.643585	0.651612
	841.572	0.147917	0.20124	0.152264	0.0183198	0.0279583	0.0362621					841.572	0.947504	0.988851	0.905324	0.671766	0.639298	0.651213
	845.56	0.147368	0.200202	0.14967	0.0199762	0.0290218	0.0359267					845.56	0.949487	0.985529	0.904518	0.667672	0.643314	0.651868
	849.549	0.145448	0.198447	0.154085	0.0184286	0.029164	0.0370981					849.549	0.944322	0.972176	0.910793	0.665251	0.639668	0.649432
	853.537	0.146424	0.202001	0.150728	0.0184655	0.0268276	0.0352205					853.537	0.949255	0.979164	0.908324	0.661939	0.641725	0.654302
	857.526	0.142054	0.200406	0.152046	0.0175584	0.028952	0.0366986					857.526	0.946231	0.9682	0.915959	0.657582	0.640826	0.65351
	861.514	0.145032	0.199965	0.15326	0.0175999	0.0300047	0.0370448					861.514	0.949733	0.968506	0.913627	0.6534	0.64259	0.647188
	865.503	0.14541	0.202996	0.15488	0.0172571	0.0282206	0.0357024					865.503	0.945522	0.970884	0.915072	0.659433	0.6377	0.648819
	869.491	0.145228	0.204911	0.155815	0.0181567	0.0281316	0.0354425					869.491	0.950333	0.969791	0.911497	0.660725	0.640614	0.649683
	873.48	0.148329	0.201344	0.157583	0.0172033	0.0284991	0.0340357					873.48	0.947426	0.97145	0.906227	0.660353	0.640685	0.646543
	877.468	0.148008	0.203465	0.15498	0.0176858	0.0284592	0.0389779					877.468	0.943627	0.985853	0.910051	0.657161	0.642103	0.643626
	881.457	0.146556	0.201603	0.156361	0.018111	0.0282699	0.0342933					881.457	0.946677	0.980599	0.913717	0.658054	0.641398	0.64679
	885.445	0.148107	0.202006	0.158464	0.0178365	0.029544	0.0360984					885.445	0.941757	0.98524	0.917489	0.660644	0.638654	0.639955
	889.433	0.147756	0.206676	0.160209	0.0174153	0.0274949	0.0361192					889.433	0.943004	0.982784	0.916567	0.655436	0.643309	0.650202
	893.422	0.148027	0.208519	0.157083	0.0151319	0.0262363	0.036568					893.422	0.939175	0.987308	0.911685	0.653332	0.640734	0.64199
