# Supplementary material for: Dynamic early clusters of nodal proteins contribute to node of Ranvier assembly during myelination of peripheral neurons
Source: eLife. 2021 Jul 9;10:e68089. doi: 10.7554/eLife.68089 (PMC8289411; doi:10.7554/eLife.68089)
Supplement: Figure 4—source data 1. [file elife-68089-fig4-data1.xlsx]

## Sheet: Sheet1
	Figure 4C-source data
	Recovery (%)
	Early clusters		Heminodes		Nodes
	WT	Caspr-/-	WT	Caspr-/-	WT	Caspr-/-
	0.508843	0.642396	0.399789	0.508947	0.0224315	0.24921
	0.605402	0.593799	0.330405	0.299049	0.0199579	0.155387
	0.474678	0.552658	0.341241	0.447471	0.0919751	0.156511
	0.584223	0.701379	0.33796	0.452815
