# Supplementary material for: Dynamic early clusters of nodal proteins contribute to node of Ranvier assembly during myelination of peripheral neurons
Source: eLife. 2021 Jul 9;10:e68089. doi: 10.7554/eLife.68089 (PMC8289411; doi:10.7554/eLife.68089)
Supplement: Figure 5—figure supplement 2—source data 1. [file elife-68089-fig5-figsupp2-data1.xlsx]

## Sheet: Sheet1
	Figure 5S2C-source data			Figure 5S2D-source data
	Mobile early clusters (%)			Speed of mobile early clusters (µm/h)
	DMSO	LatA		DMSO	LatA
	71.0526	31.5789		0.993125	0.655625
	96.6667	48.6486		1.0125	0.570688
	97.3684	41.1765		0.865	0.6825
