# Supplementary material for: Dynamic early clusters of nodal proteins contribute to node of Ranvier assembly during myelination of peripheral neurons
Source: eLife. 2021 Jul 9;10:e68089. doi: 10.7554/eLife.68089 (PMC8289411; doi:10.7554/eLife.68089)
Supplement: Figure 6—source data 1. [file elife-68089-fig6-data1.xlsx]

## Sheet: Sheet1
		Figure 6A-source data											Figure 6B-source data
		Normalised SEP-Nfasc186+ early clusters / 100 neurons											Normalised SEP-Nfasc186+ early clusters / 100 neurons
	Days myelinating	Early clusters			Heminodes			Nodes				Days myelinating	Early clusters			Heminodes			Nodes
	5	62.982	35.5367	17.3789	0	0	0	0	0	0		5	0	2.99257	5.55556	0	0	0	0	0	0
	10	100	74.3429	66.8091	17.2236	0	0	1.02828	0	0		10	0.257069	11.7647	4.8433	0	0	0	0	0	0
	15	65.8678	100	100	47.1797	1.62703	7.40741	20.5262	0.250313	0.14245		15	0	13.5169	24.9288	0.612724	0	0	0	0	0
	20	16.5435	60.9183	60.6303	67.706	17.8642	26.8173	42.8907	2.69891	5.82984		20	1.53181	13.4946	43.2865	0.919086	0.257039	0	0	0	0
	40	0.33659	2.31335	18.6555	76.7424	44.4678	52.177	117.47	76.4691	85.8443		40	8.75133	16.0649	40.0801	6.05861	2.69891	10.7852	1.00977	2.69891	5.24685
