# Supplementary material for: Dynamic early clusters of nodal proteins contribute to node of Ranvier assembly during myelination of peripheral neurons
Source: eLife. 2021 Jul 9;10:e68089. doi: 10.7554/eLife.68089 (PMC8289411; doi:10.7554/eLife.68089)
Supplement: Source data 1. [file elife-68089-data1.xlsx]

## Sheet: Sheet1
Genotype	Mouse	Image	Total clusters	Single clusters	% single clusters	Average per mouse
b1Nav-EGFP	1	24	59	43	72.8814	85.0274
b1Nav-EGFP	1	25	36	34	94.4444
b1Nav-EGFP	1	26	26	23	88.4615
b1Nav-EGFP	1	27	37	31	83.7838
b1Nav-EGFP	1	28	13	10	76.9231
b1Nav-EGFP	1	29	28	25	89.2857
b1Nav-EGFP	1	30	85	76	89.4118
			284
b1Nav-EGFP	2	11	57	44	77.193	83.9185
b1Nav-EGFP	2	12	62	51	82.2581
b1Nav-EGFP	2	13	63	57	90.4762
b1Nav-EGFP	2	14	34	27	79.4118
b1Nav-EGFP	2	15	102	95	93.1373
b1Nav-EGFP	2	16	58	47	81.0345
			376
b1Nav-EGFP	3	17	121	110	90.9091	87.5106
b1Nav-EGFP	3	18	108	99	91.6667
b1Nav-EGFP	3	19	70	57	81.4286
b1Nav-EGFP	3	20	102	92	90.1961
b1Nav-EGFP	3	21	79	72	91.1392
b1Nav-EGFP	3	22	22	18	81.8182
b1Nav-EGFP	3	23	48	41	85.4167
			550
			1870
WT	1	8	78	66	84.6154	85.9746
WT	1	9	89	77	86.5169
WT	1	10	82	72	87.8049
WT	1	11	42	35	83.3333
WT	1	12	30	25	83.3333
WT	1	13	41	37	90.2439
			362
WT	2	1	49	43	87.7551	88.4871
WT	2	2	81	72	88.8889
WT	2	3	46	37	80.4348
WT	2	4	5	5	100
WT	2	5	39	34	87.1795
WT	2	6	33	27	81.8182
WT	2	7	75	70	93.3333
			328
WT	3	4	38	31	81.5789	85.5756
WT	3	5	17	11	64.7059
WT	3	6	18	17	94.4444
WT	3	7	26	24	92.3077
WT	3	8	16	15	93.75
WT	3	9	30	26	86.6667
			145
			1525
SEP-Nfasc186	1	1	33	24	72.7273	78.1694
SEP-Nfasc186	1	3	23	19	82.6087
SEP-Nfasc186	1	10	43	37	86.0465
SEP-Nfasc186	1	11	33	27	81.8182
SEP-Nfasc186	1	12	13	7	53.8462
SEP-Nfasc186	1	13	16	13	81.25
SEP-Nfasc186	1	14	45	40	88.8889
			206
SEP-Nfasc186	2	1	36	31	86.1111	78.9585
SEP-Nfasc186	2	2	21	13	61.9048
SEP-Nfasc186	2	3	34	30	88.2353
SEP-Nfasc186	2	4	48	42	87.5
SEP-Nfasc186	2	5	24	17	70.8333
SEP-Nfasc186	2	6	24	19	79.1667
			187
SEP-Nfasc186	3	7	29	27	93.1034	87.97
SEP-Nfasc186	3	8	40	37	92.5
SEP-Nfasc186	3	9	38	33	86.8421
SEP-Nfasc186	3	10	41	33	80.4878
SEP-Nfasc186	3	11	17	16	94.1176
SEP-Nfasc186	3	12	26	21	80.7692
			191
			977

## Sheet: P1,3,5 WTs
Age	Genotype	Mouse	Image	Node	Heminode	Single cluster	Total	% nodes	% heminodes	% single clusters
P1	WT	1	21	0	5	17	22	0	22.7273	77.2727
	WT		22	0	4	13	17	0	23.5294	76.4706
	WT		23	0	8	26	34	0	23.5294	76.4706
	WT		24	1	7	32	40	2.5	17.5	80
	WT		26	0	2	17	19	0	10.5263	89.4737
							132	0.5	19.5625	79.9375	Avr/mouse
	WT	2	27	0	5	22	27	0	18.5185	81.4815
	WT		28	1	8	31	40	2.5	20	77.5
	WT		29	0	7	25	32	0	21.875	78.125
	WT		30	0	6	28	34	0	17.6471	82.3529
	WT		31	0	8	35	43	0	18.6047	81.3953
	WT		32	0	4	18	22	0	18.1818	81.8182
							198	0.416667	19.1378	80.4455	Avr/mouse
	WT	3	33	0	3	24	27	0	11.1111	88.8889
	WT		34	0	5	33	38	0	13.1579	86.8421
	WT		35	0	3	18	21	0	14.2857	85.7143
	WT		36	0	2	19	21	0	9.52381	90.4762
	WT		37	0	3	20	23	0	13.0435	86.9565
	WT		38	0	2	20	22	0	9.09091	90.9091
							152	0	11.7022	88.2978	Avr/mouse
							482
P3	WT	1	7	5	34	17	56	8.92857	60.7143	30.3571
	WT		8	4	21	8	33	12.1212	63.6364	24.2424
	WT		9	2	15	12	29	6.89655	51.7241	41.3793
	WT		10	8	28	13	49	16.3265	57.1429	26.5306
	WT		11	7	27	10	44	15.9091	61.3636	22.7273
	WT		12	4	28	10	42	9.52381	66.6667	23.8095
	WT		13	5	26	6	37	13.5135	70.2703	16.2162
							290	11.8885	61.6455	26.4661	Avr/mouse
	WT	2	14	8	34	19	61	13.1148	55.7377	31.1475
	WT		15	12	36	12	60	20	60	20
	WT		16	13	49	23	85	15.2941	57.6471	27.0588
	WT		17	11	42	17	70	15.7143	60	24.2857
	WT		18	7	37	22	66	10.6061	56.0606	33.3333
	WT		19	4	17	11	32	12.5	53.125	34.375
	WT		20	6	36	15	57	10.5263	63.1579	26.3158
							431	13.9651	57.9612	28.0737	Avr/mouse
							721
P5	WT	1	1	39	31	8	78	50	39.7436	10.2564
	WT		2	18	32	10	60	30	53.3333	16.6667
	WT		3	37	52	13	102	36.2745	50.9804	12.7451
	WT		4	36	44	9	89	40.4494	49.4382	10.1124
	WT		5	23	20	6	49	46.9388	40.8163	12.2449
	WT		6	10	34	3	47	21.2766	72.3404	6.38298
	WT		7	42	34	7	83	50.6024	40.9639	8.43373
							508	39.3631	49.6594	10.9774	Avr/mouse
	WT	2	8	25	54	7	86	29.0698	62.7907	8.13953
	WT		9	25	49	5	79	31.6456	62.0253	6.32911
	WT		10	30	38	5	73	41.0959	52.0548	6.84932
	WT		11	25	47	6	78	32.0513	60.2564	7.69231
	WT		12	39	44	5	88	44.3182	50	5.68182
	WT		13	20	38	3	61	32.7869	62.2951	4.91803
							465	35.1613	58.2371	6.60169	Avr/mouse
	WT	3	1	26	64	7	97	26.8041	65.9794	7.21649
	WT		2	26	53	5	84	30.9524	63.0952	5.95238
	WT		3	32	52	6	90	35.5556	57.7778	6.66667
	WT		4	40	44	4	88	45.4545	50	4.54545
	WT		5	29	55	6	90	32.2222	61.1111	6.66667
	WT		6	27	40	6	73	36.9863	54.7945	8.21918
							522	34.6625	58.793	6.54447
							1495
