# Supplementary material for: Dynamic early clusters of nodal proteins contribute to node of Ranvier assembly during myelination of peripheral neurons
Source: eLife. 2021 Jul 9;10:e68089. doi: 10.7554/eLife.68089 (PMC8289411; doi:10.7554/eLife.68089)
Supplement: Source data 2. [file elife-68089-data2.xlsx]

## Sheet: Sheet1
	b1-Nav+ early clusters / 100 neurons
	Nfasc+/+	Nfasc-/-
	14.9942	0.294334
	34.0694	0.209205
	27.2727	0.135135
