# Supplementary material for: Dynamic early clusters of nodal proteins contribute to node of Ranvier assembly during myelination of peripheral neurons
Source: eLife. 2021 Jul 9;10:e68089. doi: 10.7554/eLife.68089 (PMC8289411; doi:10.7554/eLife.68089)
Supplement: Source data 3. [file elife-68089-data3.xlsx]

## Sheet: Sheet1
	SEP-Nfasc186+ early custers / 100 neurons
	Caspr+/+	Caspr-/-
	74.2857	68.3528
	51.0417	119.194
	145.266	85.1182
