# Supplementary material for: Dynamic early clusters of nodal proteins contribute to node of Ranvier assembly during myelination of peripheral neurons
Source: eLife. 2021 Jul 9;10:e68089. doi: 10.7554/eLife.68089 (PMC8289411; doi:10.7554/eLife.68089)
Supplement: Source data 4. [file elife-68089-data4.xlsx]

## Sheet: Sheet1
	Speed of mobile early clusters (µm/s)
	DMSO	Blebbistatin
	0.9625	0.68125
	0.9875	0.683125
	0.786875	0.785
	1.23252	0.662311
