# Supplementary material for: Dynamic early clusters of nodal proteins contribute to node of Ranvier assembly during myelination of peripheral neurons
Source: eLife. 2021 Jul 9;10:e68089. doi: 10.7554/eLife.68089 (PMC8289411; doi:10.7554/eLife.68089)
Supplement: Source data 5. [file elife-68089-data5.xlsx]

## Sheet: Sheet1
	Mobile early clusters at 13 d myelinating (%)		Average speed of mobile early clusters at 13 d myelinating (µm/h)
	80		0.8488
	87.5		0.9348
	85		0.8437
